# Supplementary material for: B-DNA characteristics are preserved in double stranded d(A)3·d(T)3 and d(G)3·d(C)3 mini-helixes: conclusions from DFT/M06-2X study
Source: Royal Society of Chemistry journal article supplement (doi:10.1039/c3cp51584b), 2013-01-01
Supplement: c3cp51584b.pdf [file c3cp51584b.pdf]

# B-DNA Characteristics are Preserved in Double Stranded d(A)<sub>3</sub>·d(T)<sub>3</sub> and d(G)<sub>3</sub>·d(C)<sub>3</sub> Mini-Helices: Conclusions from DFT/M06-2X Study

Tetiana A. Zubatiuk, Oleg V. Shishkin, Leonid Gorb, Dmytro M. Hovorun, and Jerzy Leszczynski

Electronic Supplementary Information

**Table 1S. M06-2X/6-31G(d,p) optimized reference geometry for d(ApApA) duplex in Model 1.**

|   |            |           |           |   |           |           |           |   |           |           |           |
|---|------------|-----------|-----------|---|-----------|-----------|-----------|---|-----------|-----------|-----------|
| O | -7.656433  | -5.000782 | 4.348359  | C | -4.207724 | 4.966607  | -2.228731 | N | 4.215622  | -0.061883 | 0.665370  |
| C | -6.333819  | -5.182992 | 4.808549  | H | -3.500632 | 5.632591  | -1.704115 | C | 4.763792  | -1.302629 | 0.854667  |
| H | -6.296165  | -5.147733 | 5.909358  | O | -3.818314 | 3.623595  | -2.008226 | C | 4.028789  | -2.424205 | 1.022907  |
| H | -6.014940  | -6.174599 | 4.476963  | C | -2.786929 | 3.333510  | -2.924579 | C | 4.610371  | -3.773352 | 1.312187  |
| H | -5.649310  | -4.426128 | 4.416151  | H | -1.813590 | 3.677014  | -2.547817 | H | 4.196866  | -4.162842 | 2.247892  |
| C | -8.201190  | -3.738567 | 4.677499  | N | -2.684888 | 1.903922  | -3.064900 | H | 5.698322  | -3.719385 | 1.400109  |
| H | -7.861168  | -3.427951 | 5.678862  | C | -1.598306 | 1.098554  | -2.833444 | H | 4.345985  | -4.489285 | 0.525278  |
| H | -9.289902  | -3.868861 | 4.707987  | N | -0.356205 | 1.450927  | -2.473293 | C | 2.580949  | -2.315622 | 0.914355  |
| C | -7.878264  | -2.637797 | 3.678427  | C | 0.434606  | 0.395858  | -2.342787 | O | 1.828021  | -3.292396 | 0.994144  |
| H | -8.471254  | -1.749773 | 3.938474  | H | 1.463668  | 0.578020  | -2.040624 | N | 2.092202  | -1.047173 | 0.687551  |
| O | -6.489172  | -2.324463 | 3.743329  | N | 0.114343  | -0.901847 | -2.529858 | H | 1.063818  | -0.914541 | 0.614934  |
| C | -5.934277  | -2.384130 | 2.423263  | C | -1.139563 | -1.233899 | -2.881348 | H | 5.851723  | -1.316986 | 0.861111  |
| N | -4.541344  | -2.757730 | 2.536970  | N | -1.475136 | -2.534512 | -3.060227 | C | 2.836265  | 0.113744  | 0.546118  |
| C | -3.530812  | -1.946261 | 3.000183  | H | -0.844355 | -3.217837 | -2.642885 | O | 2.309545  | 1.194352  | 0.366055  |
| N | -3.617715  | -0.669883 | 3.399172  | H | -2.464391 | -2.724623 | -2.947323 | H | 4.448788  | 1.962458  | 0.414148  |
| C | -2.424962  | -0.185271 | 3.710756  | C | -2.063827 | -0.192619 | -3.073455 | H | 8.206424  | 2.082258  | 1.103631  |
| H | -2.389547  | 0.862138  | 4.003275  | N | -3.397382 | -0.194753 | -3.429679 | O | 6.717512  | 3.448501  | 0.625966  |
| N | -1.232604  | -0.805883 | 3.692521  | C | -3.726792 | 1.072713  | -3.416618 | P | 6.852627  | 4.460174  | 1.931354  |
| C | -1.170512  | -2.088309 | 3.285576  | H | -4.691076 | 1.518226  | -3.654698 | O | 5.917313  | 4.023077  | 3.029437  |
| N | 0.014301   | -2.713978 | 3.240686  | C | -3.194503 | 4.051303  | -4.222815 | O | 8.282667  | 4.760253  | 2.209600  |
| H | 0.860371   | -2.172341 | 3.422982  | H | -2.322053 | 4.363951  | -4.803403 | O | 6.197629  | 5.770820  | 1.169151  |
| H | 0.100599   | -3.523293 | 2.644146  | H | -3.828092 | 3.385113  | -4.810451 | C | 5.006013  | 5.667379  | 0.420844  |
| C | -2.379594  | -2.723671 | 2.931090  | C | -4.032495 | 5.239387  | -3.733163 | C | 3.720509  | 5.498469  | 1.228484  |
| N | -2.651169  | -3.979116 | 2.422707  | O | -3.385521 | 6.501516  | -3.870096 | C | 3.730513  | 6.130637  | 2.630483  |
| C | -3.936664  | -3.948048 | 2.196746  | C | -3.451157 | 6.985552  | -5.179703 | C | 2.947671  | 5.121436  | 3.484145  |
| H | -4.501386  | -4.750269 | 1.745286  | H | -2.956144 | 7.961071  | -5.198676 | H | 3.620185  | 4.639207  | 4.196212  |
| H | -5.990567  | -1.394940 | 1.951055  | H | -4.492980 | 7.103750  | -5.515447 | H | 2.115319  | 5.590217  | 4.016843  |
| C | -6.796892  | -3.407546 | 1.702011  | H | -2.940897 | 6.321805  | -5.894909 | C | 2.448089  | 4.090007  | 2.455922  |
| H | -6.574407  | -4.413437 | 2.072894  | H | -5.007506 | 5.257624  | -4.231437 | N | 2.371424  | 2.735066  | 2.964656  |
| H | -6.739322  | -3.358116 | 0.615512  | O | -8.545296 | 3.652169  | -3.570704 | C | 3.532511  | 2.136212  | 3.395238  |
| C | -8.177252  | -3.002742 | 2.212602  | O | -6.045818 | 2.992132  | -3.960667 | C | 3.583787  | 0.845085  | 3.788267  |
| H | -8.922085  | -3.803331 | 2.117355  | H | -8.646001 | 1.492427  | -1.904058 | C | 4.820101  | 0.165978  | 4.292458  |
| O | -8.627369  | -1.827757 | 1.582363  | O | -8.039226 | -2.390135 | -0.871441 | H | 4.612769  | -0.334025 | 5.243820  |
| P | -9.178921  | -1.972493 | 0.011770  | O | 6.941517  | -5.750937 | -3.727758 | H | 5.629257  | 0.885909  | 4.431444  |
| O | -10.455880 | -2.742838 | 0.035756  | C | 7.816722  | -4.753176 | -4.221945 | H | 5.153115  | -0.610235 | 3.594229  |
| O | -9.508841  | -0.380581 | -0.221691 | C | 7.626767  | -3.405073 | -3.538418 | C | 2.373348  | 0.046969  | 3.685794  |
| C | -9.043278  | 0.684543  | 0.580826  | C | 8.065471  | -3.346450 | -2.059278 | O | 2.336790  | -1.157752 | 3.944254  |
| H | -8.931281  | 0.372616  | 1.623285  | C | 6.741635  | -3.274361 | -1.304817 | N | 1.239016  | 0.729095  | 3.891119  |
| H | -9.811737  | 1.467263  | 0.526683  | H | 6.843665  | -2.683760 | -0.398527 | H | 0.337336  | 0.218824  | 3.334450  |
| C | -7.741736  | 1.305304  | 0.105722  | H | 6.431871  | -4.283405 | -1.021541 | H | 4.409529  | 2.789560  | 3.374196  |
| H | -7.630580  | 2.280462  | 0.602843  | C | 5.770609  | -2.662463 | -2.307843 | C | 1.156058  | 2.056920  | 2.921177  |
| O | -6.629012  | 0.476519  | 0.443095  | N | 4.402497  | -3.148632 | -2.185207 | O | 0.101712  | 2.590806  | 2.630428  |
| C | -5.744483  | 0.487116  | -0.676785 | C | 3.344585  | -2.231110 | -2.164475 | H | 1.447716  | 4.335573  | 2.085319  |
| N | -4.799948  | -0.596255 | -0.552995 | N | 2.090882  | -2.799832 | -2.147968 | H | 4.759518  | 6.230871  | 2.989815  |
| C | -3.489990  | -0.462936 | -0.147124 | C | 1.786041  | -4.143263 | -2.147731 | O | 3.114295  | 7.409294  | 2.536273  |
| N | -2.844685  | 0.652924  | 0.219804  | C | 2.936031  | -5.046315 | -2.141539 | C | 3.350036  | 8.190265  | 3.671616  |
| C | -1.568563  | 0.419245  | 0.499944  | C | 2.667015  | -6.517971 | -2.112901 | H | 2.928340  | 7.736722  | 4.582386  |
| H | -0.967632  | 1.272215  | 0.809741  | H | 2.082742  | -6.778688 | -1.225390 | H | 4.426833  | 8.344481  | 3.839205  |
| N | -0.909161  | -0.757275 | 0.453348  | H | 3.601342  | -7.086702 | -2.098011 | H | 2.869965  | 9.160308  | 3.513198  |
| C | -1.577784  | -1.860074 | 0.071347  | H | 2.073575  | -6.823182 | -2.980898 | O | 3.397306  | 4.132240  | 1.411253  |
| N | -0.914581  | -3.025301 | -0.028832 | O | 0.626086  | -4.547009 | -2.182840 | H | 2.900369  | 5.983495  | 0.670817  |
| H | 0.051741   | -3.099694 | 0.283077  | H | 1.295917  | -2.096392 | -2.222487 | H | 4.923045  | 6.612935  | -0.127309 |
| H | -1.453510  | -3.866641 | -0.155002 | O | 3.518041  | -1.027612 | -2.162127 | H | 5.067131  | 4.845976  | -0.302093 |
| C | -2.946711  | -1.739598 | -0.253781 | C | 4.166888  | -4.501869 | -2.186937 | O | 5.789008  | 0.887016  | -0.772196 |
| N | -3.883931  | -2.643521 | -0.724835 | H | 5.063566  | -5.112790 | -2.232375 | H | 7.122351  | 2.327258  | -1.426475 |
| C | -4.968031  | -1.919446 | -0.890044 | H | 5.716895  | -1.573130 | -2.221517 | H | 9.127145  | 0.983356  | -1.063113 |
| H | -5.938456  | -2.275632 | -1.223047 | H | 8.631816  | -4.236528 | -1.758909 | H | 7.944393  | 0.111457  | -2.066582 |
| H | -5.145337  | 1.407660  | -0.685550 | O | 8.870474  | -2.198408 | -1.928047 | O | 10.650891 | -1.025067 | -0.571026 |
| C | -6.703680  | 0.446558  | -1.861204 | P | 9.345702  | -1.715371 | -0.392335 | O | 6.250932  | -3.052293 | -3.598158 |
| H | -7.225170  | -0.516877 | -1.869863 | O | 9.073561  | -2.838167 | 0.550442  | H | 8.229147  | -2.660051 | -4.076138 |
| H | -6.251190  | 0.665717  | -2.825275 | O | 8.150008  | -0.585032 | -0.135480 | H | 8.846640  | -5.092194 | -4.054372 |
| C | -7.666289  | 1.544840  | -1.418367 | C | 8.144546  | 0.494001  | -1.056048 | H | 7.671629  | -4.639805 | -5.306821 |
| O | -7.094005  | 2.834700  | -1.600386 | C | 7.074663  | 1.505649  | -0.699291 | C | 5.821999  | -5.940998 | -4.565953 |
| P | -7.140496  | 3.547857  | -3.089775 | C | 7.183983  | 2.109648  | 0.710016  | H | 5.165648  | -6.667470 | -4.079152 |
| O | -6.680256  | 5.049880  | -2.564152 | C | 6.200613  | 1.257086  | 1.496227  | H | 5.272213  | -5.005959 | -4.717554 |
| C | -5.606899  | 5.223865  | -1.667746 | H | 5.875742  | 1.780996  | 2.389189  | H | 6.131256  | -6.343760 | -5.543651 |
| H | -5.732807  | 4.594670  | -0.778742 | H | 6.670960  | 0.303075  | 1.747490  |   |           |           |           |
| H | -5.647547  | 6.276484  | -1.362444 | C | 5.096342  | 1.081541  | 0.455228  |   |           |           |           |

**Table 2S. M06-2X/6-31G(d,p) optimized reference geometry for d(ApApA) duplex in Model 2.**

|   |           |           |           |    |           |           |           |    |           |            |           |
|---|-----------|-----------|-----------|----|-----------|-----------|-----------|----|-----------|------------|-----------|
| O | 0.524725  | 8.323298  | 0.934860  | N  | 2.273777  | -1.209110 | -5.456030 | H  | -1.626816 | -6.492733  | -1.804886 |
| C | 1.644743  | 7.986395  | 1.719030  | C  | 0.967647  | -1.141786 | -5.668013 | H  | -3.224049 | -6.376491  | -2.640106 |
| H | 1.330702  | 7.510307  | 2.660031  | H  | 0.385449  | -2.042782 | -5.492159 | C  | -1.665232 | -5.243766  | -3.623563 |
| H | 2.225225  | 8.891094  | 1.965569  | N  | 0.255424  | -0.067198 | -6.060892 | N  | -2.067316 | -3.912364  | -3.243105 |
| C | 2.516190  | 7.012516  | 0.949713  | C  | 0.870815  | 1.104952  | -6.286684 | C  | -3.403020 | -3.604583  | -3.128190 |
| H | 3.492386  | 6.934514  | 1.445208  | N  | 0.145939  | 2.188042  | -6.631335 | C  | -3.852690 | -2.341253  | -2.982788 |
| O | 1.881261  | 5.742246  | 0.918486  | H  | 0.591829  | 3.082157  | -6.477614 | C  | -5.292943 | -1.958997  | -2.840742 |
| C | 1.821726  | 5.281448  | -0.429362 | H  | -0.862769 | 2.140117  | -6.489409 | H  | -5.426470 | -1.314084  | -1.967820 |
| N | 0.709178  | 4.381854  | -0.571259 | C  | 2.273220  | 1.139322  | -6.150143 | H  | -5.923330 | -2.845117  | -2.729091 |
| C | 0.720728  | 3.060083  | -0.188910 | N  | 3.204316  | 2.147222  | -6.315068 | H  | -5.628424 | -1.388611  | -3.715328 |
| N | 1.748130  | 2.361266  | 0.313016  | C  | 4.337241  | 1.579762  | -5.987121 | C  | -2.879299 | -1.257205  | -3.004752 |
| C | 1.414906  | 1.093933  | 0.501350  | H  | 5.326751  | 2.020115  | -6.009297 | O  | -3.211135 | -0.069234  | -2.995233 |
| H | 2.198064  | 0.433409  | 0.866175  | C  | 6.328702  | -0.934521 | -6.131915 | N  | -1.556412 | -1.637109  | -3.035326 |
| N | 0.229935  | 0.496616  | 0.278080  | H  | 6.060948  | -1.821026 | -6.711057 | H  | -0.822463 | -0.889882  | -3.014565 |
| C | -0.788992 | 1.222632  | -0.224243 | H  | 6.466813  | -0.081116 | -6.800001 | H  | -4.074711 | -4.460153  | -3.176668 |
| N | -1.966414 | 0.638028  | -0.460061 | C  | 7.583830  | -1.146193 | -5.271142 | C  | -1.080442 | -2.919217  | -3.199598 |
| H | -2.080506 | -0.359268 | -0.283128 | O  | 7.949170  | -2.498382 | -5.095221 | O  | 0.108983  | -3.167872  | -3.265376 |
| H | -2.638883 | 1.111228  | -1.043800 | C  | 8.635798  | -3.027340 | -6.200501 | H  | -0.571380 | -5.228595  | -3.679176 |
| C | -0.554163 | 2.590663  | -0.475584 | H  | 8.886591  | -4.062467 | -5.963049 | H  | -2.318598 | -8.487015  | -3.522914 |
| N | -1.341802 | 3.578819  | -1.031516 | H  | 9.562355  | -2.468900 | -6.399581 | O  | -0.353321 | -7.831999  | -3.580705 |
| C | -0.555916 | 4.619008  | -1.066633 | H  | 8.022056  | -3.013502 | -7.112233 | P  | 0.200531  | -8.764308  | -2.385841 |
| H | -0.833886 | 5.585677  | -1.459856 | H  | 8.434324  | -0.574406 | -5.666185 | O  | 0.120298  | -8.089613  | -1.017826 |
| H | 2.731256  | 4.718163  | -0.675067 | O  | 9.328876  | 3.503181  | -4.897836 | O  | -0.481877 | -10.114934 | -2.366569 |
| C | 1.712551  | 6.561701  | -1.247004 | Na | 8.674788  | 3.593695  | -6.985158 | Na | -0.863882 | -9.895865  | -0.227945 |
| H | 0.727767  | 7.011099  | -1.100904 | O  | 7.402371  | 2.208427  | -5.842850 | O  | 1.719382  | -8.935038  | -2.739305 |
| H | 1.937245  | 6.432010  | -2.303544 | H  | 7.429968  | 4.981560  | -3.601398 | C  | 2.468123  | -7.895093  | -3.502421 |
| C | 2.731731  | 7.424601  | -0.518074 | O  | 4.856665  | 9.046942  | -2.271957 | C  | 2.875144  | -6.770667  | -2.574134 |
| H | 2.608589  | 8.501399  | -0.674375 | Na | 3.741859  | 9.166603  | -4.147777 | C  | 3.389271  | -7.209438  | -1.188990 |
| O | 4.060893  | 7.029965  | -0.870386 | O  | 3.895022  | 7.076627  | -3.475102 | C  | 2.849781  | -6.110720  | -0.255609 |
| P | 4.694648  | 7.541342  | -2.262974 | C  | -0.389807 | 9.130495  | 1.632200  | H  | 2.065888  | -6.505051  | -0.395975 |
| O | 6.121626  | 6.807617  | -2.205146 | H  | -0.775707 | 8.616939  | 2.523770  | H  | 3.637273  | -5.661990  | 0.354458  |
| C | 6.490079  | 5.783305  | -1.280361 | H  | 0.070691  | 10.078117 | 1.948791  | C  | 2.240038  | -5.094013  | -1.232230 |
| H | 5.962051  | 5.914633  | -0.333909 | H  | -1.220419 | 9.345409  | 0.958070  | N  | 1.124919  | -4.339050  | -0.709164 |
| H | 7.565361  | 5.899648  | -1.117002 | O  | -7.744155 | -2.817773 | -7.764099 | C  | -0.050712 | -4.992966  | -0.430643 |
| C | 6.221476  | 4.401538  | -1.837874 | C  | -8.763693 | -2.087625 | -8.403134 | C  | -1.182546 | -4.342653  | -0.090737 |
| H | 6.728775  | 3.663843  | -1.200713 | H  | -9.108777 | -1.324749 | -7.703280 | C  | -2.485880 | -5.007243  | 0.227203  |
| O | 4.822485  | 4.147493  | -1.861624 | H  | -9.609423 | -2.735318 | -8.674287 | H  | -2.884224 | -4.627395  | 1.172152  |
| C | 4.549875  | 3.435477  | -3.072597 | H  | -8.391278 | -1.599675 | -9.314315 | H  | -2.363614 | -6.091449  | 0.299672  |
| H | 4.864924  | 2.386607  | -2.982956 | C  | -7.217062 | -3.834619 | -8.587215 | H  | -3.231923 | -4.785654  | -0.545389 |
| N | 3.139200  | 3.402172  | -3.314418 | C  | -6.027605 | -4.480899 | -7.901206 | C  | -1.159254 | -2.885079  | -0.077676 |
| C | 2.343588  | 2.295492  | -3.109307 | C  | -6.297703 | -4.905069 | -6.450040 | O  | -2.167695 | -2.204760  | 0.107288  |
| N | 2.728773  | 1.084425  | -2.692561 | C  | -5.810820 | -3.699585 | -5.666037 | N  | 0.077839  | -2.057140  | -0.271517 |
| C | 1.711084  | 0.233139  | -2.663073 | H  | -5.566990 | -3.955605 | -4.639701 | H  | 0.161892  | -1.274393  | -0.107058 |
| H | 1.930356  | -0.784056 | -2.346420 | H  | -6.566716 | -2.912268 | -5.698952 | H  | 0.007382  | -6.076820  | -0.527627 |
| N | 0.425324  | 0.474742  | -2.982822 | C  | -4.578784 | -3.318088 | -6.481800 | C  | 1.248054  | -2.954503  | -0.595665 |
| C | 0.064418  | 1.698932  | -3.411618 | H  | -3.713683 | -3.928175 | -6.205474 | O  | 2.308231  | -2.374961  | -0.737379 |
| N | -1.206291 | 1.914034  | -3.777476 | N  | -4.162466 | -1.939569 | -6.354241 | H  | 2.981027  | -4.359789  | -1.562550 |
| H | -1.920026 | 1.220422  | -3.556559 | C  | -2.815013 | -1.678439 | -6.096351 | H  | 2.974804  | -8.190777  | -0.921113 |
| H | -1.498912 | 2.862897  | -3.948734 | O  | -2.000090 | -2.563687 | -5.896590 | O  | 4.795244  | -7.280968  | -1.265907 |
| C | 1.069246  | 2.689665  | -3.498692 | N  | -2.482849 | -0.349002 | -6.075893 | C  | 5.369265  | -7.937126  | -0.164261 |
| N | 1.069227  | 3.995600  | -3.959389 | H  | -1.441278 | -0.171298 | -5.991061 | H  | 5.161425  | -7.413320  | 0.779635  |
| C | 2.316840  | 4.374786  | -3.838394 | C  | -3.312812 | 0.720487  | -6.339989 | H  | 4.997378  | -8.968608  | -0.076520 |
| H | 2.717335  | 5.349485  | -4.087793 | O  | -2.883140 | 1.870829  | -6.355381 | H  | 6.448525  | -7.958398  | -0.323394 |
| C | 5.417736  | 4.182042  | -4.080787 | C  | -4.705317 | 0.379122  | -6.639188 | O  | 1.799973  | -5.883649  | -2.328383 |
| H | 5.033140  | 5.199146  | -4.204470 | C  | -5.642497 | 1.499616  | -6.965026 | H  | 3.700388  | -6.223356  | -3.059249 |
| H | 5.524642  | 3.682550  | -5.040204 | H  | -5.727221 | 2.186664  | -6.118245 | H  | 3.376934  | -8.380149  | -3.866561 |
| C | 6.718967  | 4.210265  | -3.289463 | H  | -6.636735 | 1.119130  | -7.212146 | H  | 1.906755  | -7.489615  | -4.349060 |
| O | 7.353827  | 2.926510  | -3.329972 | H  | -5.264698 | 2.083472  | -7.809134 | O  | -2.242154 | -5.572910  | -4.892620 |
| P | 8.244470  | 2.490104  | -4.602536 | C  | -5.044044 | -0.923482 | -6.664127 | H  | -1.082805 | -7.096891  | -5.682599 |
| O | 8.898722  | 1.148226  | -4.010758 | H  | -6.033137 | -1.263718 | -6.960879 | H  | -2.845972 | -8.586600  | -6.182110 |
| C | 8.197121  | 0.231270  | -3.170248 | O  | -5.442885 | -6.025841 | -6.199593 | H  | -3.434960 | -6.980579  | -6.687757 |
| H | 7.724899  | 0.768409  | -2.342783 | P  | -5.558804 | -6.868428 | -4.825778 | H  | -7.343448 | -5.181577  | -6.274497 |
| H | 8.965675  | -0.438781 | -2.777551 | O  | -5.449928 | -5.979035 | -3.589871 | O  | -4.953672 | -3.554410  | -7.841288 |
| C | 7.158413  | -0.605279 | -3.889367 | O  | -6.827249 | -7.691607 | -4.781664 | H  | -5.723872 | -5.360577  | -8.481624 |
| H | 6.940232  | -1.483158 | -3.259949 | Na | -7.339385 | -6.821442 | -2.841576 | H  | -7.987663 | -4.595068  | -8.794775 |
| O | 5.969513  | 0.135374  | -4.095911 | O  | -4.278652 | -7.819530 | -4.979450 | H  | -6.879823 | -3.414525  | -9.546483 |
| C | 5.256202  | -0.571322 | -5.096643 | C  | -3.152449 | -7.597027 | -5.831860 |    |           |            |           |
| H | 4.770747  | -1.462104 | -4.675953 | C  | -1.997911 | -6.958775 | -5.089408 |    |           |            |           |
| N | 4.204594  | 0.267416  | -5.599963 | C  | -1.755883 | -7.562946 | -3.685176 |    |           |            |           |
| C | 2.870579  | -0.037964 | -5.706262 | C  | -2.135848 | -6.413583 | -2.761329 |    |           |            |           |

**Table 3S. M06-2X/6-31G(d,p) optimized reference geometry for d(ApApA) duplex in Model 3.**

|   |           |           |           |   |           |           |           |   |           |            |           |
|---|-----------|-----------|-----------|---|-----------|-----------|-----------|---|-----------|------------|-----------|
| O | 0.232910  | 8.052580  | 1.021370  | O | 5.906070  | -0.557290 | -3.887920 | N | -1.531810 | -4.052990  | -3.453640 |
| C | -0.455750 | 8.935300  | 1.886070  | C | 5.424150  | -1.064670 | -5.123690 | C | -0.571200 | -3.073630  | -3.272030 |
| H | -0.551470 | 8.505310  | 2.891140  | H | 4.922260  | -2.024280 | -4.970950 | N | -1.059930 | -1.803230  | -3.085590 |
| H | 0.065760  | 9.897690  | 1.964460  | N | 4.412870  | -0.151460 | -5.617300 | H | -0.339540 | -1.063390  | -2.977490 |
| H | -1.449230 | 9.096360  | 1.466160  | C | 3.066640  | -0.378970 | -5.728570 | C | -2.384530 | -1.438630  | -2.997170 |
| C | 1.543210  | 7.787020  | 1.475520  | N | 2.406420  | -1.533070 | -5.543340 | O | -2.705000 | -0.253150  | -2.850160 |
| H | 1.517380  | 7.340050  | 2.480030  | C | 1.104080  | -1.382960 | -5.738190 | C | -3.348150 | -2.522710  | -3.090060 |
| H | 2.130230  | 8.715510  | 1.529190  | H | 0.482850  | -2.268720 | -5.635610 | C | -4.790150 | -2.185930  | -2.871040 |
| C | 2.212540  | 6.828470  | 0.514350  | N | 0.440710  | -0.258370 | -6.048370 | H | -4.905070 | -1.675180  | -1.909600 |
| H | 3.262850  | 6.709300  | 0.801520  | C | 1.113930  | 0.895900  | -6.213720 | H | -5.406810 | -3.085270  | -2.861240 |
| O | 1.546940  | 5.557810  | 0.581500  | N | 0.425950  | 2.014620  | -6.509330 | H | -5.159730 | -1.508920  | -3.649420 |
| C | 1.215370  | 5.140190  | -0.738230 | H | -0.579350 | 1.995370  | -6.347460 | O | 0.636530  | -3.295460  | -3.279580 |
| N | 0.087910  | 4.242410  | -0.664480 | H | 0.895120  | 2.900300  | -6.376880 | C | -2.875920 | -3.757840  | -3.358870 |
| C | 0.186900  | 2.919870  | -0.308500 | C | 2.517600  | 0.851300  | -6.084540 | H | -3.540150 | -4.603260  | -3.510830 |
| N | 1.307280  | 2.220360  | -0.062520 | N | 3.499170  | 1.819830  | -6.183500 | H | -0.023510 | -5.405830  | -3.778530 |
| C | 1.033370  | 0.949050  | 0.194530  | C | 4.604330  | 1.178050  | -5.893230 | H | -2.506620 | -8.406540  | -3.930010 |
| H | 1.880140  | 0.290550  | 0.373220  | H | 5.600910  | 1.599230  | -5.860980 | O | -0.448930 | -8.356020  | -4.134620 |
| N | -0.170310 | 0.356280  | 0.252940  | C | 6.640900  | -1.186810 | -6.038420 | P | 0.066760  | -9.193400  | -2.821040 |
| C | -1.284430 | 1.080780  | 0.028110  | H | 6.828960  | -0.235370 | -6.540580 | O | -1.053380 | -9.380660  | -1.844040 |
| N | -2.484510 | 0.490750  | 0.144210  | H | 6.510800  | -1.966710 | -6.789350 | O | 1.089390  | -8.107510  | -2.136270 |
| H | -2.520110 | -0.528280 | 0.150620  | C | 7.764850  | -1.475710 | -5.047980 | C | 2.237590  | -7.748860  | -2.908570 |
| H | -3.287790 | 0.983450  | -0.218640 | O | 7.818690  | -2.846370 | -4.687720 | C | 3.037590  | -6.710090  | -2.158890 |
| C | -1.118660 | 2.448100  | -0.277910 | C | 8.454720  | -3.652110 | -5.663470 | C | 3.501060  | -7.129290  | -0.751100 |
| N | -2.011770 | 3.449350  | -0.606010 | H | 8.492740  | -4.667150 | -5.266490 | C | 2.572600  | -6.345200  | 0.175580  |
| C | -1.254320 | 4.495970  | -0.820690 | H | 9.475640  | -3.298030 | -5.854120 | H | 3.027630  | -6.130200  | 1.136610  |
| H | -1.616670 | 5.472600  | -1.106490 | H | 7.903740  | -3.661470 | -6.610900 | H | 1.664550  | -6.924260  | 0.352580  |
| H | 2.046170  | 4.561830  | -1.161610 | H | 8.744940  | -1.144070 | -5.414690 | C | 2.286560  | -5.096300  | -0.652360 |
| C | 0.990720  | 6.431080  | -1.510210 | O | 8.158310  | 3.469880  | -6.245020 | N | 1.035690  | -4.415250  | -0.353830 |
| H | 0.041960  | 6.888300  | -1.223830 | H | 7.389550  | 5.531940  | -4.405430 | C | 1.034120  | -3.034900  | -0.255670 |
| H | 1.046360  | 6.303550  | -2.590600 | H | 7.043040  | 7.170500  | -2.456250 | N | -0.202220 | -2.468270  | -0.088690 |
| C | 2.137570  | 7.266520  | -0.958880 | O | 2.927720  | 7.776800  | -3.980300 | H | -0.203320 | -1.430910  | 0.034220  |
| H | 1.983540  | 8.345350  | -1.054680 | O | -7.884040 | -2.196450 | -7.117300 | C | -1.414930 | -3.117710  | -0.065910 |
| O | 3.355830  | 6.870800  | -1.599580 | C | -8.864520 | -1.216930 | -7.405080 | O | -2.467810 | -2.477800  | 0.048800  |
| P | 3.891620  | 7.815230  | -2.829090 | H | -8.944020 | -0.593660 | -6.530970 | C | -1.359020 | -4.565670  | -0.178390 |
| O | 4.342200  | 9.133330  | -2.267280 | H | -9.838050 | -1.682310 | -7.603170 | C | -2.645550 | -5.328230  | -0.102150 |
| O | 5.157270  | 6.890910  | -3.261990 | H | -8.574750 | -0.617680 | -8.277220 | H | -3.144570 | -5.135350  | 0.852570  |
| C | 6.152120  | 6.556630  | -2.291470 | C | -7.682590 | -3.083270 | -8.198780 | H | -2.471930 | -6.401420  | -0.195560 |
| H | 5.779820  | 6.736410  | -1.279020 | C | -6.534410 | -4.021910 | -7.885470 | H | -3.330060 | -5.010590  | -0.596220 |
| C | 6.509300  | 5.090830  | -2.438770 | C | -6.608780 | -4.663550 | -6.494740 | O | 2.054750  | -2.352360  | -0.294750 |
| H | 7.302020  | 4.854610  | -1.721570 | C | -5.731820 | -3.740630 | -5.660670 | C | -0.143960 | -5.129930  | -0.336730 |
| O | 5.359110  | 4.280330  | -2.149370 | H | -5.312710 | -4.226770 | -4.783910 | H | -0.028190 | -6.201900  | -0.451960 |
| C | 5.021730  | 3.479320  | -3.276930 | H | -6.327150 | -2.883250 | -5.340840 | H | 3.075140  | -4.353200  | -0.530960 |
| H | 5.392470  | 2.454900  | -3.147730 | C | -4.659280 | -3.309490 | -6.651670 | H | 3.420590  | -8.213250  | -0.600290 |
| N | 3.580730  | 3.369380  | -3.369410 | N | -4.119690 | -1.974060 | -6.403370 | O | 4.854130  | -6.724890  | -0.621360 |
| C | 2.832530  | 2.241710  | -3.119340 | C | -2.758030 | -1.805840 | -6.247000 | C | 5.493650  | -7.284400  | 0.511850  |
| N | 3.256560  | 1.026590  | -2.734250 | N | -2.351420 | -0.508860 | -6.075890 | H | 5.034800  | -6.948850  | 1.449110  |
| C | 2.252890  | 0.158960  | -2.656310 | H | -1.313250 | -0.373780 | -6.018830 | H | 6.533050  | -6.955340  | 0.489430  |
| H | 2.508710  | -0.857570 | -2.364640 | C | -3.141450 | 0.618090  | -6.096760 | H | 5.457940  | -8.380470  | 0.476330  |
| N | 0.946130  | 0.369770  | -2.888680 | O | -2.630930 | 1.739940  | -5.993300 | O | 2.226170  | -5.543840  | -1.998810 |
| C | 0.537160  | 1.602990  | -3.254040 | C | -4.566210 | 0.384490  | -6.267820 | H | 3.925260  | -6.463770  | -2.752680 |
| N | -0.759530 | 1.821710  | -3.500000 | C | -5.486520 | 1.565540  | -6.303920 | H | 2.860440  | -8.629860  | -3.093500 |
| H | -1.451850 | 1.109510  | -3.268900 | H | -5.442330 | 2.120530  | -5.362140 | H | 1.916100  | -7.333430  | -3.870740 |
| H | -1.071880 | 2.761750  | -3.692170 | H | -6.516710 | 1.246530  | -6.472520 | O | 0.858890  | -10.351550 | -3.350310 |
| C | 1.521530  | 2.605850  | -3.398910 | H | -5.198480 | 2.256450  | -7.101860 | O | -1.517540 | -5.578910  | -5.212990 |
| N | 1.449800  | 3.920510  | -3.814400 | O | -1.951830 | -2.735100 | -6.259760 | H | -1.189720 | -7.379080  | -6.178510 |
| C | 2.694070  | 4.334370  | -3.783420 | C | -4.974830 | -0.890920 | -6.432790 | H | -3.496560 | -8.050190  | -6.291770 |
| H | 3.014990  | 5.338330  | -4.034070 | H | -6.014670 | -1.145390 | -6.622880 | H | -3.359630 | -6.375560  | -6.884970 |
| C | 5.678340  | 4.163850  | -4.468700 | H | -3.803260 | -3.987400 | -6.642580 | O | -5.953040 | -8.323780  | -5.713940 |
| H | 5.076960  | 5.012360  | -4.798930 | H | -7.632930 | -4.723440 | -6.117810 | O | -5.286580 | -3.310080  | -7.926460 |
| H | 5.852170  | 3.502040  | -5.311680 | O | -6.066610 | -5.984410 | -6.616130 | H | -6.509630 | -4.803250  | -8.651450 |
| C | 6.963340  | 4.692480  | -3.849870 | P | -5.795160 | -6.897000 | -5.281200 | H | -8.592400 | -3.672570  | -8.383270 |
| O | 7.956500  | 3.674560  | -3.676670 | O | -6.540090 | -6.345160 | -4.103840 | H | -7.445090 | -2.522860  | -9.114150 |
| P | 8.582360  | 2.851540  | -4.948030 | O | -4.207410 | -6.583510 | -5.003170 |   |           |            |           |
| O | 10.028270 | 2.618520  | -4.625480 | C | -3.279170 | -7.017690 | -6.000380 |   |           |            |           |
| O | 7.764120  | 1.433440  | -4.829630 | C | -1.875970 | -6.948310 | -5.442090 |   |           |            |           |
| C | 7.975500  | 0.660380  | -3.645890 | C | -1.709610 | -7.678540 | -4.100040 |   |           |            |           |
| H | 7.535960  | 1.179420  | -2.786230 | C | -1.738430 | -6.542400 | -3.087190 |   |           |            |           |
| H | 9.048050  | 0.528210  | -3.469620 | H | -1.187330 | -6.777640 | -2.180650 |   |           |            |           |
| C | 7.329440  | -0.699160 | -3.799270 | H | -2.777640 | -6.332470 | -2.828070 |   |           |            |           |
| H | 7.569660  | -1.289940 | -2.908970 | C | -1.112270 | -5.390230 | -3.862770 |   |           |            |           |

**Table 4S. M06-2X/6-31G(d,p) optimized reference geometry for d(ApApA) duplex in Model 4.**

|    |           |           |           |   |            |           |           |    |           |            |           |
|----|-----------|-----------|-----------|---|------------|-----------|-----------|----|-----------|------------|-----------|
| O  | -0.386750 | 8.234430  | 0.224020  | H | 4.461790   | -2.469010 | -4.879520 | H  | -2.762480 | -6.340370  | -2.619250 |
| C  | 0.628940  | 8.566310  | 1.146440  | C | 6.453950   | -1.719980 | -5.368510 | C  | -1.368520 | -5.332960  | -3.955870 |
| H  | 0.345800  | 8.240470  | 2.157840  | H | 6.853700   | -0.764800 | -5.715370 | N  | -1.837340 | -4.010320  | -3.563750 |
| H  | 0.788620  | 9.654290  | 1.170590  | H | 6.481650   | -2.435510 | -6.190970 | C  | -3.171940 | -3.791740  | -3.287450 |
| C  | 1.924830  | 7.880490  | 0.761700  | N | 4.246280   | -0.533940 | -5.488040 | C  | -3.697050 | -2.566400  | -3.067610 |
| H  | 2.704610  | 8.219940  | 1.450030  | C | 4.518040   | 0.811160  | -5.568890 | C  | -5.113040 | -2.301400  | -2.658980 |
| O  | 1.800750  | 6.455720  | 0.893000  | H | 5.493300   | 1.192040  | -5.291580 | H  | -5.130260 | -1.792310  | -1.690030 |
| C  | 1.813230  | 5.827080  | -0.381330 | N | 3.505560   | 1.527560  | -5.991070 | H  | -5.684460 | -3.227360  | -2.575130 |
| N  | 0.729860  | 4.866820  | -0.469870 | C | 2.494160   | 0.601920  | -6.184130 | H  | -5.607670 | -1.643120  | -3.380650 |
| C  | 0.865670  | 3.508040  | -0.325360 | C | 1.123010   | 0.721320  | -6.496610 | C  | -2.818580 | -1.418630  | -3.234610 |
| N  | 1.988960  | 2.816570  | -0.072900 | N | 0.397940   | -0.413420 | -6.562870 | O  | -3.197530 | -0.241760  | -3.168860 |
| C  | 1.760050  | 1.510300  | -0.047290 | C | 0.975590   | -1.591630 | -6.288210 | N  | -1.499240 | -1.709860  | -3.477150 |
| H  | 2.618040  | 0.866090  | 0.132330  | N | 2.230350   | -1.817820 | -5.924120 | H  | -0.824160 | -0.900030  | -3.516370 |
| N  | 0.594670  | 0.869840  | -0.224190 | H | 0.315850   | -2.452660 | -6.353420 | H  | -3.783190 | -4.688370  | -3.242410 |
| C  | -0.526130 | 1.579940  | -0.473650 | N | 0.500330   | 1.890980  | -6.741070 | C  | -0.945820 | -2.951580  | -3.623130 |
| N  | -1.673810 | 0.926360  | -0.677850 | H | 0.965810   | 2.741770  | -6.457120 | O  | 0.262300  | -3.099550  | -3.793590 |
| H  | -1.716460 | -0.082850 | -0.550050 | H | -0.516740  | 1.883930  | -6.697590 | H  | -0.282290 | -5.254430  | -4.039290 |
| H  | -2.523580 | 1.441780  | -0.847030 | C | 2.940670   | -0.681950 | -5.877250 | H  | -2.450530 | -8.464720  | -3.643640 |
| C  | -0.407320 | 2.987140  | -0.524810 | C | 7.213830   | -2.188690 | -4.129320 | O  | -0.471080 | -8.227940  | -4.199500 |
| N  | -1.317250 | 3.995990  | -0.775640 | O | 6.986820   | -3.566140 | -3.868870 | P  | 0.444860  | -8.800190  | -2.984790 |
| C  | -0.600980 | 5.092890  | -0.728720 | C | 7.744390   | -4.432960 | -6.494160 | O  | -0.347630 | -8.982640  | -1.716680 |
| H  | -0.986190 | 6.095590  | -0.851810 | H | 7.476820   | -5.452010 | -4.410390 | O  | 1.492620  | -7.580410  | -2.734220 |
| H  | 2.732360  | 5.240520  | -0.492340 | H | 8.819400   | -4.278910 | -4.537800 | C  | 2.347340  | -7.233550  | -3.835270 |
| C  | 1.729620  | 6.945960  | -1.413940 | H | 7.519140   | -4.290310 | -5.756910 | C  | 3.287060  | -6.127000  | -3.416540 |
| H  | 0.691950  | 7.205350  | -1.621430 | H | 8.290180   | -1.980410 | -4.180090 | C  | 4.200280  | -6.442980  | -2.202030 |
| H  | 2.221010  | 6.698110  | -2.350840 | O | 8.331310   | 2.740810  | -4.900950 | C  | 3.493600  | -5.744890  | -1.059970 |
| C  | 2.373010  | 8.113610  | -0.682840 | H | 7.367850   | 4.859260  | -2.901900 | H  | 4.157410  | -5.476110  | -0.237850 |
| C  | 3.812040  | 8.048770  | -0.662970 | O | 3.963100   | 8.176540  | -3.254880 | H  | 2.697030  | -6.389160  | -0.680560 |
| P  | 4.706030  | 7.811640  | -1.996580 | H | 2.065780   | 9.086260  | -1.073730 | C  | 2.921910  | -4.520320  | -1.762540 |
| O  | 6.027660  | 8.501580  | -1.768360 | C | -1.637820  | 8.784130  | 0.592080  | N  | 1.766370  | -3.898800  | -1.131510 |
| Na | 5.781020  | 9.649410  | -3.827470 | H | -1.952010  | 8.418300  | 1.577670  | C  | 0.624320  | -4.638220  | -0.896160 |
| O  | 4.909710  | 6.196020  | -2.013190 | H | -1.592790  | 9.880020  | 0.621190  | C  | -0.541050 | -4.091080  | -0.490720 |
| C  | 5.675850  | 5.618210  | -0.947180 | H | -2.365030  | 8.470820  | -0.158100 | C  | -1.767780 | -4.867400  | -0.122950 |
| H  | 5.082600  | 5.637150  | -0.026060 | O | -8.067580  | -2.237010 | -6.958670 | H  | -2.098990 | -4.584600  | -0.880700 |
| H  | 6.594360  | 6.193030  | -0.793100 | C | -9.029830  | -1.244360 | -7.262910 | H  | -1.571510 | -5.940420  | -0.133260 |
| C  | 6.041080  | 4.186680  | -1.277760 | H | -9.058240  | -0.550390 | -6.421960 | H  | -2.592950 | -4.650480  | -0.809550 |
| H  | 6.662500  | 3.814110  | -0.457400 | H | -10.022720 | -1.689690 | -7.401020 | C  | -0.608620 | -2.640330  | -0.404370 |
| O  | 4.866670  | 3.369600  | -1.364970 | H | -8.755790  | -0.699940 | -8.175210 | O  | -1.648430 | -2.016570  | -0.159630 |
| C  | 4.692460  | 2.874150  | -2.687490 | C | -7.950540  | -3.200920 | -7.985270 | N  | 0.577620  | -1.971030  | -0.605510 |
| H  | 4.917640  | 1.802580  | -2.721420 | C | -6.810390  | -4.145650 | -7.660440 | H  | 0.585530  | -0.935750  | -0.463390 |
| N  | 3.298940  | 2.990930  | -3.054390 | C | -6.845650  | -4.676150 | -6.223290 | H  | 0.730910  | -5.707940  | -1.049910 |
| C  | 2.407530  | 1.954660  | -3.130950 | C | -5.901560  | -3.734260 | -5.495120 | C  | 1.788450  | -2.530920  | -0.923860 |
| N  | 2.664680  | 0.649370  | -2.975770 | H | -5.448790  | -4.187070 | -4.617520 | O  | 2.806690  | -1.851320  | -1.021090 |
| C  | 1.579750  | -0.083260 | -3.172520 | H | -6.458520  | -2.846360 | -5.192220 | H  | 3.672860  | -3.735210  | -1.861960 |
| H  | 1.696340  | -1.162710 | -3.129580 | C | -4.866770  | -3.396610 | -6.561330 | H  | 4.320070  | -7.522150  | -2.061660 |
| N  | 0.335240  | 0.346110  | -3.427460 | N | -4.274370  | -2.065640 | -6.434120 | O  | 5.455290  | -5.848480  | -2.513780 |
| C  | 0.082460  | 1.664610  | -3.535660 | C | -2.898010  | -1.935070 | -6.432220 | C  | 6.478910  | -6.192830  | -1.598270 |
| N  | -1.180880 | 2.059900  | -3.751980 | N | -2.438490  | -0.643960 | -6.416940 | H  | 6.256880  | -5.844670  | -0.583480 |
| H  | -1.921030 | 1.372290  | -3.627240 | C | -3.195200  | 0.506650  | -6.446470 | H  | 6.632060  | -7.278910  | -1.573660 |
| H  | -1.411260 | 3.037700  | -3.653390 | C | -4.636660  | 0.311380  | -6.438950 | H  | 7.390380  | -5.703900  | -1.946430 |
| C  | 1.183300  | 2.541740  | -3.433270 | C | -5.520760  | 1.519760  | -6.461340 | O  | 2.516780  | -4.979720  | -3.047140 |
| N  | 1.310670  | 3.916260  | -3.533210 | H | -5.352070  | 2.137020  | -5.573650 | H  | 3.919230  | -5.879880  | -4.276940 |
| C  | 2.583100  | 4.134420  | -3.302950 | H | -6.572070  | 1.227980  | -6.488990 | H  | 2.924070  | -8.108310  | -4.150450 |
| H  | 3.072660  | 5.099280  | -3.305030 | H | -5.305060  | 2.141450  | -7.335220 | H  | 1.730370  | -6.888160  | -4.672050 |
| C  | 5.639010  | 3.681100  | -3.566390 | O | -2.643070  | 1.611200  | -6.495090 | O  | 1.172230  | -10.014510 | -3.506990 |
| H  | 5.177020  | 4.625830  | -3.858320 | H | -1.402760  | -0.527670 | -6.468260 | Na | 0.346730  | -11.278150 | -1.677050 |
| H  | 5.950410  | 3.148460  | -4.462390 | O | -2.127620  | -2.893190 | -6.442920 | O  | -1.944910 | -5.649120  | -5.218610 |
| C  | 6.778580  | 3.987980  | -2.607460 | C | -5.096750  | -0.956690 | -6.457650 | H  | -1.598800 | -7.482650  | -6.115410 |
| O  | 7.659460  | 2.870650  | -2.391610 | H | -6.157720  | -1.184670 | -6.521140 | H  | -3.863520 | -8.325800  | -5.801640 |
| P  | 8.344150  | 2.008230  | -3.584780 | H | -4.030820  | -4.099220 | -6.542960 | H  | -3.864280 | -6.747880  | -6.635620 |
| O  | 9.692230  | 1.556970  | -3.079450 | H | -7.854060  | -4.673400 | -5.803820 | O  | -6.465840 | -8.292180  | -5.141410 |
| Na | 10.728660 | 2.573430  | -4.955760 | O | -6.355460  | -6.028650 | -6.258060 | Na | -7.947070 | -8.226210  | -3.269100 |
| O  | 7.339650  | 0.736180  | -3.728310 | P | -6.103480  | -6.852040 | -4.877820 | O  | -5.553580 | -3.465240  | -7.803520 |
| C  | 7.194520  | -0.124410 | -2.588150 | O | -6.772530  | -6.190670 | -3.700990 | H  | -6.836170 | -4.980820  | -8.367280 |
| H  | 6.583900  | 0.382850  | -1.832710 | O | -4.497020  | -6.702280 | -4.663150 | H  | -8.883800 | -3.774590  | -8.079480 |
| H  | 8.177540  | -0.348080 | -2.161740 | C | -3.659600  | -7.256540 | -5.687360 | H  | -7.747470 | -2.713020  | -8.949100 |
| C  | 6.523520  | -1.417930 | -2.997840 | C | -2.209860  | -7.051620 | -5.315310 |    |           |            |           |
| H  | 6.471820  | -2.056470 | -2.109560 | C | -1.778210  | -7.670370 | -3.975920 |    |           |            |           |
| O  | 5.191310  | -1.160930 | -3.455490 | C | -1.760240  | -6.477140 | -3.031500 |    |           |            |           |
| C  | 5.042350  | -1.543740 | -4.817780 | H | -1.058820  | -6.598900 | -2.209110 |    |           |            |           |

**Table S5. M06-2X/6-31G(d,p) optimized reference geometry for d(CpCpC) duplex in Model 1.**

|   |           |           |           |   |           |           |            |   |            |           |            |
|---|-----------|-----------|-----------|---|-----------|-----------|------------|---|------------|-----------|------------|
| O | 4.615020  | 6.162820  | -2.678750 | H | 4.773020  | -5.978130 | -8.524380  | N | 0.646500   | -1.653350 | -6.697080  |
| C | 3.567390  | 5.688510  | -1.860520 | H | 5.901560  | -4.607170 | -8.661630  | H | 0.642050   | -2.646340 | -6.501200  |
| H | 3.922970  | 5.516220  | -0.832120 | N | 3.766070  | -3.116260 | -8.554470  | H | 1.553640   | -1.185350 | -6.678040  |
| H | 2.801890  | 6.469310  | -1.840410 | C | 2.415220  | -2.875740 | -8.894480  | H | 0.478150   | 0.765920  | -6.824600  |
| H | 3.137510  | 4.754900  | -2.234330 | O | 1.564570  | -3.710170 | -8.589840  | O | -1.352380  | 2.447220  | -6.779200  |
| C | 5.726330  | 5.286750  | -2.748060 | N | 2.122410  | -1.715950 | -9.545350  | C | -2.662380  | -0.830290 | -6.022700  |
| H | 5.899170  | 4.818530  | -1.765980 | C | 3.083970  | -0.868730 | -9.887510  | H | -7.114140  | -4.323810 | -4.912540  |
| H | 6.596630  | 5.900920  | -3.005840 | C | 4.471610  | -1.172500 | -9.691330  | O | -5.264570  | -5.256360 | -5.155400  |
| C | 5.587110  | 4.211760  | -3.809790 | H | 5.248200  | -0.491430 | -10.012660 | P | -5.578620  | -6.792330 | -5.694210  |
| O | 4.528800  | 3.322110  | -3.451710 | N | 2.735570  | 0.304450  | -10.442500 | O | -5.628380  | -7.726260 | -4.538780  |
| C | 3.740190  | 3.099800  | -4.619720 | H | 1.755810  | 0.617210  | -10.333930 | O | -4.071700  | -7.016860 | -6.383330  |
| N | 2.442770  | 2.583210  | -4.227380 | H | 3.437940  | 1.029640  | -10.455360 | C | -3.826450  | -6.315780 | -7.584390  |
| C | 2.398740  | 1.248720  | -3.744410 | C | 4.754500  | -2.266210 | -8.952110  | H | -4.178120  | -5.276440 | -7.526080  |
| N | 1.196510  | 0.766340  | -3.319350 | H | 5.761540  | -2.512080 | -8.620190  | C | -2.328720  | -6.272180 | -7.839760  |
| C | 0.073540  | 1.432600  | -3.559460 | C | 5.879580  | -5.459510 | -6.691750  | O | -1.734400  | -5.237910 | -7.052110  |
| N | -1.088640 | 0.900820  | -3.150700 | O | 5.249760  | -6.537040 | -6.014310  | C | -0.840930  | -5.762020 | -6.085780  |
| H | -1.107940 | 0.000440  | -2.679980 | C | 5.560140  | -7.787110 | -6.560580  | N | -1.066980  | -5.087470 | -4.829780  |
| H | -1.951320 | 1.282130  | -3.518540 | H | 5.077150  | -8.543540 | -5.937470  | C | -2.289580  | -4.997970 | -4.175500  |
| C | 0.075870  | 2.707870  | -4.223130 | H | 6.647180  | -7.965300 | -6.564740  | N | -2.293810  | -4.101500 | -3.231160  |
| H | -0.840810 | 3.187460  | -4.535610 | H | 5.194100  | -7.901770 | -7.591190  | C | -1.023940  | -3.556130 | -3.264640  |
| O | 3.431910  | 0.590420  | -3.717650 | H | 6.948930  | -5.674780 | -6.832530  | C | -0.506860  | -2.389150 | -2.629490  |
| C | 1.279980  | 3.230480  | -4.530880 | O | 8.868890  | -2.123660 | -8.895990  | O | -1.055180  | -1.629930 | -1.824790  |
| H | 1.373800  | 4.172390  | -5.054580 | H | 9.183380  | 0.571250  | -7.727050  | N | 0.794150   | -2.098460 | -3.068980  |
| H | 4.234820  | 2.347270  | -5.243220 | H | 9.494160  | 2.586490  | -6.197960  | H | 1.122810   | -1.153130 | -2.831340  |
| C | 3.743230  | 4.470820  | -5.288610 | O | 6.538740  | 4.947370  | -8.900200  | C | 1.496200   | -2.786710 | -4.025760  |
| H | 3.195670  | 5.187950  | -4.666710 | O | -6.696310 | 2.320150  | -11.334640 | N | 2.734680   | -2.329330 | -4.297880  |
| H | 3.372380  | 4.477960  | -6.313140 | C | -7.673860 | 1.305770  | -11.449430 | H | 2.978550   | -1.369370 | -4.050410  |
| H | 6.531840  | 3.657440  | -3.885080 | C | -7.561120 | 0.202090  | -10.379130 | H | 3.178570   | -2.678970 | -5.141490  |
| C | 5.235720  | 4.769500  | -5.208780 | C | -7.965680 | 0.641670  | -8.956140  | N | 1.011650   | -3.851790 | -4.645550  |
| H | 5.487590  | 5.830680  | -5.298620 | C | -6.625400 | 1.054840  | -8.362370  | H | -3.141760  | -5.591680 | -4.488480  |
| O | 5.866000  | 3.997400  | -6.199220 | H | -6.620010 | 1.015690  | -7.277020  | C | -0.252350  | -4.143040 | -4.260650  |
| P | 7.083010  | 4.622010  | -7.140000 | H | -6.432500 | 2.082190  | -8.677800  | C | -1.130070  | -7.265060 | -6.032810  |
| O | 7.864350  | 5.563020  | -6.280870 | C | -5.636670 | 0.105330  | -9.029980  | H | -1.948630  | -7.460080 | -5.336770  |
| O | 7.877960  | 3.177580  | -7.326480 | H | -5.467710 | -0.813830 | -9.454960  | H | -0.247810  | -7.861380 | -5.734150  |
| C | 8.395180  | 2.579660  | -6.155870 | N | -4.331840 | 0.700790  | -9.257440  | H | 0.192420   | -5.540570 | -6.374800  |
| H | 8.098200  | 3.149960  | -5.269380 | C | -3.142220 | 0.020670  | -9.340330  | C | -1.610270  | -7.568450 | -7.449530  |
| C | 7.928730  | 1.139590  | -6.007460 | N | -2.962790 | -1.292320 | -9.104930  | H | -2.293150  | -8.428760 | -7.481180  |
| H | 8.361950  | 0.736940  | -5.082690 | C | -1.700100 | -1.657740 | -9.189470  | O | -0.533820  | -7.761380 | -8.358580  |
| O | 6.507240  | 1.076330  | -5.907980 | N | -1.343760 | -2.945630 | -8.964330  | C | 0.063860   | -9.019100 | -8.241540  |
| C | 5.950590  | 0.315120  | -6.966390 | H | -1.963640 | -3.432480 | -8.325810  | H | 0.535800   | -9.176150 | -7.260670  |
| H | 5.615950  | -0.662750 | -6.607850 | H | -0.356000 | -3.144750 | -8.804970  | H | -0.667530  | -9.829020 | -8.397230  |
| N | 4.725730  | 0.995330  | -7.422020 | N | -0.683740 | -0.793190 | -9.530840  | H | 0.837420   | -9.086680 | -9.010690  |
| C | 3.463540  | 0.461800  | -7.061580 | H | 0.286830  | -1.148100 | -9.507260  | H | -2.132710  | -6.045290 | -8.894620  |
| O | 3.388650  | -0.693970 | -6.650400 | C | -0.828370 | 0.574880  | -9.766850  | H | -4.339740  | -6.810030 | -8.420650  |
| N | 2.363200  | 1.260420  | -7.196910 | O | 0.162840  | 1.278810  | -10.012600 | O | -6.607120  | -6.732780 | -6.778090  |
| C | 2.445670  | 2.430290  | -7.819570 | C | -2.192170 | 0.982080  | -9.677510  | O | -4.985110  | -2.958240 | -7.029130  |
| N | 1.348080  | 3.215980  | -7.850380 | N | -2.769020 | 2.231240  | -9.798560  | H | -6.190260  | -4.590090 | -7.437370  |
| H | 0.433470  | 2.837420  | -7.579260 | C | -4.026020 | 2.021430  | -9.535320  | H | -8.316990  | -3.447100 | -7.011010  |
| H | 1.318500  | 3.929090  | -8.561780 | H | -4.794380 | 2.779770  | -9.546680  | H | -7.335270  | -2.645500 | -8.262340  |
| C | 3.683700  | 2.908230  | -8.360580 | O | -8.569880 | -0.492080 | -8.381090  | O | -10.007000 | -1.488450 | -6.564360  |
| H | 3.792940  | 3.882940  | -8.819660 | P | -8.763180 | -0.688190 | -6.731250  | H | -8.672290  | 1.483660  | -8.958050  |
| C | 4.797690  | 2.192430  | -8.059660 | O | -8.481690 | 0.605720  | -6.042260  | O | -6.219950  | -0.241090 | -10.296000 |
| H | 5.785470  | 2.572030  | -8.297780 | O | -7.438870 | -1.650320 | -6.463350  | H | -8.209800  | -0.615700 | -10.671870 |
| C | 7.058490  | 0.189960  | -8.011270 | C | -7.400430 | -2.869940 | -7.188680  | H | -8.661770  | 1.779870  | -11.374140 |
| H | 7.008770  | -0.706790 | -8.625180 | C | -6.191550 | -3.699960 | -6.802470  | H | -7.603460  | 0.839220  | -12.444300 |
| H | 7.087280  | 1.074710  | -8.653590 | C | -6.119900 | -4.136590 | -5.332890  | C | -5.589610  | 2.095490  | -12.185370 |
| C | 8.323630  | 0.200220  | -7.157740 | C | -5.385380 | -2.962800 | -4.695720  | H | -5.124380  | 1.124500  | -11.987110 |
| O | 8.642090  | -1.045780 | -6.558310 | H | -4.883870 | -3.239180 | -3.766060  | H | -4.858140  | 2.882540  | -11.994530 |
| P | 8.799860  | -2.439530 | -7.441080 | H | -6.075140 | -2.129730 | -4.544660  | H | -5.902570  | 2.140950  | -13.241870 |
| O | 9.752300  | -3.313140 | -6.701360 | C | -4.372180 | -2.627000 | -5.790090  |   |            |           |            |
| O | 7.254890  | -3.035320 | -7.190820 | H | -3.451910 | -3.210100 | -5.682150  |   |            |           |            |
| C | 6.895910  | -3.291460 | -5.847060 | N | -3.946800 | -1.238040 | -5.801270  |   |            |           |            |
| H | 7.729520  | -3.780080 | -5.325710 | C | -4.724830 | -0.093020 | -5.810450  |   |            |           |            |
| H | 6.658330  | -2.353060 | -5.328550 | H | -5.799030 | -0.146270 | -5.665770  |   |            |           |            |
| C | 5.681350  | -4.196550 | -5.843410 | N | -4.033290 | 0.996960  | -6.019170  |   |            |           |            |
| H | 5.428430  | -4.486850 | -4.816750 | C | -2.727440 | 0.557090  | -6.156300  |   |            |           |            |
| O | 4.570620  | -3.499860 | -6.406260 | C | -1.528110 | 1.251710  | -6.523270  |   |            |           |            |
| C | 4.080860  | -4.142690 | -7.571060 | N | -0.437660 | 0.372860  | -6.574520  |   |            |           |            |
| H | 3.139730  | -4.651150 | -7.353940 | C | -0.490540 | -0.990690 | -6.419740  |   |            |           |            |
| C | 5.185940  | -5.109150 | -8.007000 | N | -1.590730 | -1.645840 | -6.114340  |   |            |           |            |



**Table 6S. M06-2X/6-31G(d,p) optimized reference geometry for d(CpCpC) duplex in Model 2.**

|    |           |           |           |    |           |           |            |    |           |            |            |
|----|-----------|-----------|-----------|----|-----------|-----------|------------|----|-----------|------------|------------|
| O  | 1.953300  | 4.485810  | -5.451270 | O  | 2.362550  | -3.403750 | -8.571130  | C  | -4.485980 | -0.293740  | -4.983220  |
| C  | 2.937100  | 5.449440  | -5.201530 | N  | 2.994240  | -1.614720 | -9.846890  | H  | -5.520790 | -0.321660  | -4.680170  |
| C  | 4.057690  | 4.797410  | -4.411910 | C  | 3.994040  | -0.942640 | -10.408720 | N  | -3.699300 | 0.745010   | -4.940400  |
| O  | 3.586390  | 4.402540  | -3.122930 | C  | 5.358740  | -1.350700 | -10.245600 | C  | -2.505770 | 0.297700   | -5.482790  |
| C  | 3.330390  | 3.019920  | -3.074920 | H  | 6.182710  | -0.872380 | -10.758640 | C  | -1.278000 | 0.973540   | -5.773190  |
| H  | 3.856340  | 2.588470  | -2.220020 | N  | 3.679820  | 0.132780  | -11.146760 | O  | -1.003510 | 2.176960   | -5.698340  |
| N  | 1.887590  | 2.779560  | -2.846910 | H  | 2.745740  | 0.545230  | -11.009700 | N  | -0.309640 | 0.074440   | -6.225400  |
| C  | 1.517170  | 1.434660  | -2.722860 | H  | 4.425280  | 0.731870  | -11.459230 | H  | 0.632190  | 0.454080   | -6.431320  |
| N  | 0.201580  | 1.129190  | -2.639240 | C  | 5.596560  | -2.310800 | -9.318040  | C  | -0.497790 | -1.256330  | -6.477830  |
| C  | -0.727380 | 2.080920  | -2.732650 | H  | 6.596940  | -2.622230 | -9.043390  | N  | -1.655810 | -1.865920  | -6.337310  |
| N  | -2.009230 | 1.711700  | -2.667820 | C  | 6.381760  | -5.517810 | -8.055170  | N  | 0.580250  | -1.928350  | -6.943600  |
| H  | -2.229580 | 0.710900  | -2.616930 | O  | 6.819090  | -6.830590 | -7.824860  | H  | 1.507510  | -1.536980  | -6.792200  |
| H  | -2.706590 | 2.291310  | -3.110990 | C  | 6.471170  | -7.714840 | -8.864850  | H  | 0.519410  | -2.932570  | -6.844070  |
| C  | -0.368720 | 3.465900  | -2.844550 | H  | 6.906960  | -8.685280 | -8.623340  | C  | -2.599440 | -1.041300  | -5.843450  |
| H  | -1.123710 | 4.238410  | -2.889960 | H  | 5.382530  | -7.825410 | -8.956040  | H  | -3.636570 | -3.339460  | -6.122550  |
| O  | 2.416510  | 0.585490  | -2.717980 | H  | 6.870200  | -7.370800 | -9.829440  | H  | -7.086790 | -4.606380  | -6.315630  |
| C  | 0.950570  | 3.759770  | -2.901130 | H  | 6.770480  | -5.145360 | -9.017690  | O  | -5.132290 | -5.339160  | -6.366460  |
| H  | 1.339360  | 4.766530  | -2.981440 | H  | 8.966470  | -5.083480 | -7.033400  | P  | -5.587920 | -6.807120  | -5.889200  |
| C  | 3.787540  | 2.415190  | -4.411890 | O  | 8.776010  | -1.382930 | -9.624050  | O  | -5.825520 | -6.900790  | -4.397030  |
| H  | 4.367610  | 1.502330  | -4.290510 | O  | 6.604210  | 3.802230  | -7.178890  | Na | -7.812110 | -7.735620  | -4.804030  |
| H  | 2.909670  | 2.201870  | -5.025830 | H  | 4.506330  | 3.532070  | -6.150680  | O  | -4.220450 | -7.601670  | -6.208630  |
| H  | 4.868230  | 5.519570  | -4.259550 | H  | 2.526440  | 6.283550  | -4.608020  | C  | -3.550490 | -7.453330  | -7.460300  |
| C  | 4.601100  | 3.520990  | -5.061700 | H  | 3.333210  | 5.870750  | -6.143490  | C  | -2.071480 | -7.236090  | -7.195890  |
| O  | 5.984280  | 3.372690  | -4.702440 | C  | 0.704630  | 5.032970  | -5.817490  | C  | -1.453810 | -8.286340  | -6.256450  |
| P  | 7.133370  | 3.786610  | -5.746780 | H  | 0.386060  | 5.787040  | -5.080380  | C  | -1.445260 | -7.565840  | -4.912250  |
| O  | 7.778020  | 5.109010  | -5.387300 | H  | -0.014790 | 4.213640  | -5.831920  | H  | -0.672010 | -7.922770  | -4.229420  |
| Na | 7.361730  | 5.867880  | -7.381250 | H  | 0.757170  | 5.510160  | -6.806310  | H  | -2.422970 | -7.670410  | -4.435600  |
| O  | 8.211670  | 2.598370  | -5.556640 | O  | -5.851210 | 3.644180  | -9.167820  | C  | -1.217410 | -6.112880  | -5.328320  |
| C  | 8.017830  | 1.436180  | -4.754740 | C  | -5.787790 | 5.036070  | -9.361700  | N  | -1.741950 | -5.151600  | -4.399180  |
| H  | 7.384390  | 1.663510  | -3.893940 | H  | -5.160090 | 5.448210  | -8.570020  | C  | -3.036890 | -5.102950  | -3.904970  |
| H  | 9.010380  | 1.135390  | -4.406920 | H  | -6.786500 | 5.492670  | -9.305060  | N  | -3.293990 | -3.998820  | -3.265400  |
| C  | 7.395620  | 0.312090  | -5.557420 | H  | -5.346240 | 5.281960  | -10.337730 | C  | -2.121820 | -3.273820  | -3.335750  |
| H  | 7.440360  | -0.619950 | -4.977920 | C  | -6.636620 | 3.000380  | -10.145080 | C  | -1.830720 | -1.935670  | -2.918910  |
| O  | 6.046090  | 0.654000  | -5.839220 | C  | -6.570830 | 1.496720  | -9.945720  | O  | -2.590510 | -1.107870  | -2.417540  |
| C  | 5.770800  | 0.234790  | -7.172020 | C  | -6.759150 | 1.058940  | -8.488890  | N  | -0.495890 | -1.606510  | -3.185870  |
| H  | 5.621290  | -0.849280 | -7.181760 | H  | -7.369810 | 1.766870  | -7.917910  | H  | 0.211670  | -0.644040  | -2.917070  |
| N  | 4.524290  | 0.841010  | -7.587110 | C  | -5.331460 | 0.942080  | -7.978610  | C  | 0.411150  | -2.401900  | -3.837980  |
| C  | 3.338870  | 0.256510  | -7.074420 | H  | -5.254090 | 0.209960  | -7.178660  | N  | 1.636180  | -1.874930  | -4.004930  |
| O  | 3.389380  | -0.859410 | -6.558110 | H  | -4.972670 | 1.911620  | -7.626880  | H  | 1.923100  | -1.000080  | -3.562750  |
| N  | 2.192210  | 0.975480  | -7.172690 | C  | -4.569990 | 0.502170  | -9.225610  | H  | 2.297670  | -2.383430  | -4.566620  |
| C  | 2.125450  | 2.093390  | -7.889280 | H  | -4.481960 | -0.587940 | -9.277600  | N  | 0.125800  | -3.604730  | -4.312000  |
| N  | 0.976130  | 2.774600  | -7.900320 | N  | -3.217210 | 1.010030  | -9.310340  | H  | -3.740300 | -5.913190  | -4.048880  |
| H  | 0.197170  | 2.453050  | -7.325510 | C  | -2.826440 | 2.328660  | -9.439400  | C  | -1.145470 | -3.966250  | -4.038190  |
| H  | 0.733450  | 3.320840  | -8.715390 | H  | -3.556630 | 3.121130  | -9.343120  | H  | -0.153110 | -5.881500  | -5.445650  |
| C  | 3.280960  | 2.600130  | -8.579160 | N  | -1.553100 | 2.469250  | -9.688610  | H  | -2.043910 | -9.214610  | -6.235030  |
| H  | 3.221590  | 3.488940  | -9.191630 | C  | -1.072030 | 1.173060  | -9.728090  | O  | -0.147740 | -8.548620  | -6.734070  |
| C  | 4.457060  | 1.979060  | -8.340700 | C  | 0.220710  | 0.659020  | -10.039820 | C  | 0.459120  | -9.657810  | -6.120070  |
| H  | 5.400240  | 2.364290  | -8.703960 | N  | 0.265950  | -0.726600 | -9.903660  | H  | 0.607510  | -9.511950  | -5.041750  |
| C  | 7.044720  | 0.624400  | -7.912310 | C  | -0.799930 | -1.536240 | -9.611470  | H  | -0.138760 | -10.569600 | -6.265610  |
| H  | 7.146390  | 1.713700  | -7.934250 | N  | -2.023740 | -1.087710 | -9.434510  | H  | 1.434360  | -9.793170  | -6.590270  |
| H  | 7.153820  | 0.182730  | -8.901440 | N  | -0.546750 | -2.873280 | -9.552030  | O  | -1.886800 | -5.970670  | -6.577630  |
| C  | 8.068220  | 0.065920  | -6.928900 | H  | -1.260080 | -3.361390 | -9.023860  | H  | -1.531230 | -7.265490  | -8.150860  |
| H  | 9.055510  | 0.535260  | -6.997350 | H  | 0.406080  | -3.120290 | -9.283520  | H  | -3.946230 | -6.595100  | -8.010680  |
| O  | 8.181670  | -1.353030 | -7.087010 | H  | 1.215520  | -1.137770 | -9.955560  | H  | -3.701870 | -8.364470  | -8.049850  |
| P  | 9.096200  | -1.974500 | -8.263430 | O  | 1.227250  | 1.289170  | -10.398430 | O  | -6.774930 | -7.288870  | -6.700860  |
| O  | 10.567120 | -1.887280 | -7.919850 | C  | -2.090230 | 0.255110  | -9.491100  | O  | -4.998430 | -2.355830  | -7.351830  |
| Na | 10.937230 | -1.010170 | -9.901030 | O  | -7.395110 | -0.224040 | -8.536900  | H  | -5.250130 | -4.134460  | -8.386260  |
| O  | 8.531420  | -3.485900 | -8.250740 | P  | -8.091990 | -0.824960 | -7.207420  | H  | -7.572990 | -3.883700  | -8.823010  |
| C  | 8.331830  | -4.192240 | -7.025280 | O  | -7.325190 | -0.410300 | -5.961440  | H  | -6.801280 | -2.323730  | -9.213410  |
| H  | 8.595880  | -3.565880 | -6.169000 | Na | -9.173250 | 0.396270  | -5.105840  | O  | -5.302030 | 0.998500   | -10.342950 |
| C  | 6.887170  | -4.631950 | -6.918990 | O  | -9.551910 | -0.438790 | -7.100370  | H  | -7.342420 | 1.030130   | -10.568850 |
| H  | 6.774930  | -5.197830 | -5.980700 | C  | -7.990020 | -2.401870 | -7.510260  | H  | -7.683820 | 3.338810   | -10.072920 |
| O  | 6.024360  | -3.501970 | -6.923450 | O  | -7.059430 | -3.012280 | -8.405330  | H  | -6.266270 | 3.236950   | -11.154100 |
| C  | 4.789260  | -3.824730 | -7.524450 | C  | -5.801030 | -3.473210 | -7.702000  |    |           |            |            |
| H  | 3.963960  | -3.622000 | -6.839760 | C  | -6.056620 | -4.243840 | -6.387300  |    |           |            |            |
| C  | 4.870020  | -5.294830 | -7.948530 | C  | -5.648200 | -3.238500 | -5.316460  |    |           |            |            |
| H  | 4.484020  | -5.936580 | -7.149490 | H  | -5.379250 | -3.703860 | -4.368140  |    |           |            |            |
| H  | 4.294100  | -5.475940 | -8.856490 | H  | -6.432450 | -2.483950 | -5.197180  |    |           |            |            |
| N  | 4.574470  | -2.914730 | -8.663500 | C  | -4.461930 | -2.619030 | -6.043290  |    |           |            |            |
| C  | 3.237520  | -2.664630 | -9.022070 | N  | -3.886660 | -1.409610 | -5.538270  |    |           |            |            |

**Table 7S. M06-2X/6-31G(d,p) optimized reference geometry for d(CpCpC) duplex in Model 3.**

|   |           |           |           |   |           |           |            |   |           |            |            |
|---|-----------|-----------|-----------|---|-----------|-----------|------------|---|-----------|------------|------------|
| O | 4.636290  | 5.979850  | -2.161310 | N | 4.133920  | -2.901110 | -9.429550  | C | -2.490970 | 0.394790   | -6.434000  |
| C | 4.697970  | 6.893040  | -1.082900 | C | 5.094190  | -1.945180 | -9.597670  | C | -1.255060 | 1.044820   | -6.731430  |
| H | 4.478130  | 6.393280  | -0.130820 | H | 6.107800  | -2.248470 | -9.348270  | O | -1.047750 | 2.262360   | -6.841560  |
| H | 5.690350  | 7.356470  | -1.014130 | C | 4.777190  | -0.705530 | -10.028090 | N | -0.223920 | 0.130640   | -6.923880  |
| H | 3.950480  | 7.666130  | -1.264270 | H | 5.525800  | 0.061400  | -10.167860 | C | -0.375100 | -1.231470  | -6.973750  |
| C | 5.568480  | 4.928420  | -2.016860 | C | 3.383620  | -0.418220 | -10.198230 | N | -1.529080 | -1.848440  | -6.777440  |
| H | 5.369560  | 4.362580  | -1.095170 | N | 2.448060  | -1.360230 | -10.050610 | N | 0.723320  | -1.941920  | -7.302210  |
| H | 6.594280  | 5.322640  | -1.964670 | N | 2.988270  | 0.817390  | -10.514820 | H | 0.663970  | -2.934930  | -7.123270  |
| C | 5.465520  | 4.009540  | -3.213730 | H | 2.000010  | 1.057590  | -10.415580 | H | 1.640690  | -1.509930  | -7.176030  |
| H | 6.259160  | 3.257790  | -3.147820 | H | 3.662890  | 1.568820  | -10.501510 | H | 0.712400  | 0.536460   | -7.115720  |
| O | 4.185790  | 3.359830  | -3.207940 | C | 2.791570  | -2.626800 | -9.707730  | C | -2.532220 | -0.989750  | -6.503080  |
| C | 3.609320  | 3.477210  | -4.505750 | O | 1.954760  | -3.541620 | -9.634390  | O | -5.185110 | -5.328840  | -5.511530  |
| N | 2.170140  | 3.305300  | -4.384100 | C | 5.534690  | -4.948150 | -9.808510  | P | -5.802780 | -6.850340  | -5.515160  |
| C | 1.709930  | 1.996620  | -4.175320 | H | 6.260470  | -4.245140 | -10.225350 | O | -6.576070 | -7.087770  | -4.251720  |
| N | 0.389100  | 1.786560  | -3.983920 | H | 5.054310  | -5.488820 | -10.624880 | O | -4.405550 | -7.666610  | -5.348210  |
| C | -0.474240 | 2.810180  | -3.997970 | C | 6.221110  | -5.860760 | -8.796170  | C | -3.494020 | -7.727290  | -6.448240  |
| N | -1.756760 | 2.543050  | -3.769370 | O | 5.478850  | -7.047360 | -8.563830  | C | -2.097050 | -7.419360  | -5.955360  |
| H | -2.057470 | 1.585740  | -3.575310 | C | 5.652110  | -8.017070 | -9.581500  | C | -1.689240 | -8.205570  | -4.695060  |
| H | -2.442930 | 3.281510  | -3.793840 | H | 5.078010  | -8.896580 | -9.288420  | C | -1.834840 | -7.168520  | -3.581350  |
| C | -0.037350 | 4.152940  | -4.245870 | H | 6.710150  | -8.290360 | -9.682130  | H | -1.197220 | -7.363610  | -2.718670  |
| H | -0.735790 | 4.977000  | -4.282850 | H | 5.287640  | -7.662050 | -10.552040 | H | -2.877910 | -7.123220  | -3.260630  |
| O | 2.541210  | 1.072740  | -4.160000 | H | 7.249870  | -6.113060 | -9.083590  | C | -1.448910 | -5.894470  | -4.317680  |
| C | 1.288070  | 4.346490  | -4.420400 | O | 9.279250  | -1.637760 | -9.131260  | N | -1.934140 | -4.664720  | -3.742160  |
| H | 1.701030  | 5.327970  | -4.604790 | H | 9.248000  | 0.283650  | -7.073190  | C | -3.208880 | -4.399940  | -3.284500  |
| C | 4.111560  | 4.819450  | -5.013040 | O | 8.147740  | 5.011390  | -6.908670  | N | -3.410820 | -3.134460  | -3.036270  |
| H | 3.644710  | 5.643060  | -4.470770 | O | -7.123610 | 2.596090  | -9.824180  | C | -2.213460 | -2.524170  | -3.361930  |
| H | 3.996670  | 4.954220  | -6.087960 | C | -7.219980 | 4.005280  | -9.915880  | C | -1.848650 | -1.146240  | -3.383420  |
| H | 3.967720  | 2.663160  | -5.144310 | H | -6.806960 | 4.421540  | -8.996360  | O | -2.577010 | -0.173210  | -3.130000  |
| C | 5.564280  | 4.741670  | -4.567840 | H | -8.265370 | 4.321500  | -10.021410 | N | -0.521600 | -0.968810  | -3.755870  |
| H | 6.026650  | 5.726380  | -4.466310 | H | -6.649390 | 4.380730  | -10.774580 | H | -0.182590 | 0.012950   | -3.805940  |
| O | 6.279880  | 3.937710  | -5.510640 | C | -7.634620 | 1.956230  | -10.975120 | C | 0.351120  | -1.979550  | -4.082560  |
| P | 7.893130  | 4.191710  | -5.678390 | C | -7.408840 | 0.460090  | -10.883100 | N | -0.000690 | -3.255920  | -4.156320  |
| O | 8.452660  | 4.605500  | -4.346620 | C | -7.811710 | -0.156380 | -9.542670  | N | 1.621350  | -1.620770  | -4.314820  |
| O | 8.343750  | 2.671320  | -6.056730 | C | -6.505010 | -0.146050 | -8.756570  | H | 1.908280  | -0.639960  | -4.343200  |
| C | 8.382930  | 1.687750  | -5.021020 | H | -6.458000 | -0.928120 | -7.998420  | H | 2.231950  | -2.319720  | -4.709790  |
| H | 7.870880  | 2.045260  | -4.122750 | H | -6.363840 | 0.830160  | -8.288720  | H | -3.940490 | -5.186840  | -3.168380  |
| H | 9.426550  | 1.481800  | -4.764480 | C | -5.459870 | -0.365940 | -9.846790  | C | -1.283010 | -3.457210  | -3.795160  |
| C | 7.717820  | 0.416960  | -5.501270 | N | -4.198870 | 0.314400  | -9.614860  | H | -0.361860 | -5.791700  | -4.394790  |
| H | 7.853090  | -0.356600 | -4.737680 | C | -4.027170 | 1.680770  | -9.498470  | H | -2.328560 | -9.083310  | -4.537040  |
| O | 6.319640  | 0.664560  | -5.693750 | H | -4.882860 | 2.335810  | -9.395750  | O | -0.342280 | -8.613240  | -4.869170  |
| C | 5.931370  | 0.237090  | -6.998390 | N | -2.775430 | 2.047730  | -9.561460  | C | 0.076080  | -9.565980  | -3.908160  |
| H | 5.589090  | -0.799920 | -6.976000 | C | -2.082640 | 0.865580  | -9.747500  | H | 0.058760  | -9.157310  | -2.891310  |
| N | 4.778050  | 1.035200  | -7.391230 | C | -0.686640 | 0.621870  | -9.877880  | H | -0.563240 | -10.457060 | -3.938980  |
| C | 3.488860  | 0.512250  | -7.174910 | O | 0.230070  | 1.459500  | -9.863650  | H | 1.099750  | -9.846480  | -4.158590  |
| O | 3.360930  | -0.681790 | -6.855830 | N | -0.408230 | -0.730330 | -10.032450 | O | -2.023330 | -6.029830  | -5.613000  |
| N | 2.421460  | 1.332030  | -7.318740 | C | -1.340270 | -1.736470 | -10.014460 | H | -1.381860 | -7.639250  | -6.756200  |
| C | 2.579850  | 2.606890  | -7.693380 | N | -2.643580 | -1.527280 | -9.914980  | H | -3.521700 | -8.734050  | -6.875870  |
| N | 1.499960  | 3.383400  | -7.732120 | N | -0.862570 | -2.990430 | -10.138880 | H | -3.771560 | -7.008450  | -7.225830  |
| H | 0.587300  | 2.998760  | -7.481400 | H | -1.518420 | -3.728810 | -9.929270  | O | -6.431440 | -7.109580  | -6.855590  |
| H | 1.574580  | 4.344880  | -8.026420 | H | 0.126250  | -3.172110 | -9.954390  | H | -7.056070 | -4.522850  | -5.961170  |
| C | 3.871290  | 3.135550  | -8.021590 | H | 0.598110  | -0.983800 | -10.072800 | O | -4.743970 | -2.975660  | -7.629510  |
| H | 3.998930  | 4.153770  | -8.361990 | C | -2.947590 | -0.219680 | -9.782640  | H | -5.095110 | -4.998500  | -7.942320  |
| C | 4.931910  | 2.325770  | -7.809210 | H | -5.210820 | -1.424430 | -9.967970  | H | -7.352150 | -4.823150  | -8.611810  |
| H | 5.947390  | 2.673480  | -7.945800 | H | -8.612750 | 0.398400  | -9.049630  | H | -6.514880 | -3.477910  | -9.434630  |
| C | 7.195330  | 0.360830  | -7.840420 | O | -8.249260 | -1.491120 | -9.823870  | O | -9.660150 | -3.499300  | -9.364770  |
| H | 7.408220  | 1.395900  | -8.112130 | P | -8.978950 | -2.370180 | -8.651990  | O | -6.021020 | 0.140210   | -11.052440 |
| H | 7.184700  | -0.255890 | -8.736110 | O | -9.712390 | -1.467960 | -7.706580  | H | -7.968370 | -0.017970  | -11.692970 |
| C | 8.251970  | -0.105260 | -6.846270 | O | -7.698710 | -2.943270 | -7.810010  | H | -8.712780 | 2.151710   | -11.072210 |
| O | 8.285670  | -1.531950 | -6.749260 | C | -6.831830 | -3.871320 | -8.461520  | H | -7.135600 | 2.337130   | -11.877990 |
| P | 9.066230  | -2.431890 | -7.878270 | C | -5.625590 | -4.110690 | -7.581490  |   |           |            |            |
| O | 10.209210 | -3.132000 | -7.201940 | C | -5.994180 | -4.301470 | -6.094250  |   |           |            |            |
| O | 7.884860  | -3.518320 | -8.203090 | C | -5.590120 | -2.972940 | -5.474020  |   |           |            |            |
| C | 7.473910  | -4.361300 | -7.124070 | H | -5.404000 | -3.037960 | -4.404450  |   |           |            |            |
| H | 7.315690  | -3.762340 | -6.220740 | H | -6.361010 | -2.228710 | -5.687790  |   |           |            |            |
| H | 8.240990  | -5.115560 | -6.920570 | C | -4.343780 | -2.676500 | -6.291580  |   |           |            |            |
| C | 6.174760  | -5.037290 | -7.497090 | H | -3.512270 | -3.330260 | -5.994020  |   |           |            |            |
| H | 5.881850  | -5.698990 | -6.674420 | N | -3.836280 | -1.328680 | -6.242160  |   |           |            |            |
| O | 5.170180  | -4.031140 | -7.680300 | C | -4.510510 | -0.141290 | -6.037960  |   |           |            |            |
| C | 4.525270  | -4.214500 | -8.932760 | H | -5.564020 | -0.124310 | -5.799790  |   |           |            |            |
| H | 3.604910  | -4.785460 | -8.811160 | N | -3.742800 | 0.910740  | -6.149740  |   |           |            |            |

**Table 8S. M06-2X/6-31G(d,p) optimized reference geometry for d(CpCp) duplex in Model 4.**

|    |           |           |            |    |           |           |            |    |           |            |            |
|----|-----------|-----------|------------|----|-----------|-----------|------------|----|-----------|------------|------------|
| O  | 4.194780  | 6.552070  | -2.612220  | C  | 4.706740  | -0.311730 | -10.233370 | N  | -3.969830 | -1.612180  | -6.512110  |
| C  | 4.993930  | 5.939940  | -1.620560  | H  | 5.437490  | 0.484520  | -10.186900 | C  | -4.627560 | -0.432920  | -6.199100  |
| H  | 4.389570  | 5.691420  | -0.736690  | C  | 3.309820  | -0.039160 | -10.409500 | H  | -5.671260 | -0.433360  | -5.919970  |
| H  | 5.796610  | 6.622900  | -1.306370  | N  | 2.401270  | -1.018040 | -10.442650 | N  | -3.857250 | 0.613570   | -6.273820  |
| C  | 5.612720  | 4.669190  | -2.168500  | N  | 2.880740  | 1.217510  | -10.550290 | C  | -2.624410 | 0.111380   | -6.649440  |
| H  | 6.379500  | 4.331420  | -1.464620  | H  | 3.528000  | 1.974590  | -10.385020 | C  | -1.378220 | 0.763860   | -6.884370  |
| O  | 4.626790  | 3.632880  | -2.289270  | H  | 1.882630  | 1.404650  | -10.437630 | O  | -1.154320 | 1.983450   | -6.856950  |
| C  | 4.430990  | 3.252490  | -3.646020  | C  | 2.771660  | -2.313220 | -10.294880 | N  | -0.366300 | -0.139020  | -7.188390  |
| H  | 4.853570  | 2.263790  | -3.833190  | O  | 1.951590  | -3.244110 | -10.342750 | H  | 0.586240  | 0.253150   | -7.334940  |
| N  | 2.987050  | 3.130830  | -3.870450  | C  | 5.685340  | -4.525790 | -10.549910 | C  | -0.533220 | -1.491670  | -7.339600  |
| C  | 2.202240  | 4.219500  | -3.609830  | H  | 6.433060  | -3.758450 | -10.764120 | N  | -1.688090 | -2.111860  | -7.154760  |
| H  | 2.733550  | 5.229130  | -3.346570  | H  | 5.347440  | -4.964000 | -11.489800 | N  | 0.546410  | -2.184660  | -7.751670  |
| C  | 0.855810  | 4.141030  | -3.641910  | C  | 6.267320  | -5.552710 | -9.580570  | H  | 1.480830  | -1.781350  | -7.645350  |
| H  | 0.233260  | 4.997870  | -3.425290  | O  | 5.556790  | -6.779000 | -9.614660  | H  | 0.471500  | -3.189610  | -7.681210  |
| C  | 0.287430  | 2.849210  | -3.896210  | C  | 5.918760  | -7.597000 | -10.713080 | C  | -2.675370 | -1.263850  | -6.801440  |
| N  | -1.033320 | 2.689120  | -3.838540  | H  | 5.351040  | -8.523870 | -10.624640 | O  | -5.238190 | -5.622350  | -5.873740  |
| H  | -1.618110 | 3.471660  | -3.588150  | H  | 6.991900  | -7.824300 | -10.690840 | P  | -5.848290 | -6.597840  | -4.691420  |
| H  | -1.458810 | 1.762580  | -3.881460  | H  | 5.680250  | -7.123640 | -11.672550 | O  | -6.188870 | -5.839320  | -3.430670  |
| N  | 1.051800  | 1.785640  | -4.174550  | H  | 7.335960  | -5.735920 | -9.752250  | O  | -4.532970 | -7.478110  | -4.384440  |
| C  | 2.407190  | 1.887150  | -4.154500  | O  | 9.424950  | -1.476650 | -9.040610  | C  | -3.792770 | -8.081180  | -5.458180  |
| O  | 3.139560  | 0.907870  | -4.377990  | H  | 9.076290  | 0.250660  | -6.743220  | C  | -2.329920 | -7.716060  | -5.305160  |
| C  | 5.118050  | 4.331790  | -4.481120  | O  | 7.863880  | 4.763540  | -6.027770  | C  | -1.705800 | -8.136600  | -3.962830  |
| H  | 4.433930  | 5.156570  | -4.691800  | H  | 6.519080  | 5.860600  | -3.775480  | C  | -1.681940 | -6.832470  | -3.172130  |
| H  | 5.502380  | 3.947900  | -5.421940  | C  | 3.531020  | 7.703540  | -2.123690  | H  | -0.901100 | -6.795990  | -2.411810  |
| C  | 6.224940  | 4.830750  | -3.562560  | H  | 2.867910  | 7.448200  | -1.287980  | H  | -2.652700 | -6.667700  | -2.698680  |
| O  | 7.393300  | 3.991650  | -3.593910  | H  | 4.253080  | 8.456420  | -1.784130  | C  | -1.458780 | -5.807560  | -4.277290  |
| P  | 8.236650  | 3.764920  | -4.963680  | H  | 2.939870  | 8.111690  | -2.944080  | N  | -1.924280 | -4.476380  | -3.960770  |
| O  | 9.695560  | 3.692600  | -4.586810  | O  | -7.323150 | 2.438830  | -9.565960  | C  | -3.189590 | -4.120400  | -3.541270  |
| Na | 10.152290 | 5.444090  | -6.132160  | C  | -7.485150 | 3.840510  | -9.451030  | N  | -3.328230 | -2.831540  | -3.373470  |
| O  | 7.705880  | 2.307540  | -5.456590  | H  | -7.045070 | 4.142940  | -8.500000  | C  | -2.089370 | -2.308490  | -3.694810  |
| C  | 7.937950  | 1.207190  | -4.564950  | H  | -8.547320 | 4.114970  | -9.465610  | C  | -1.631730 | -0.957850  | -3.723490  |
| H  | 7.355070  | 1.354940  | -3.649720  | H  | -6.974710 | 4.361960  | -10.270240 | O  | -2.281680 | 0.066240   | -3.464050  |
| H  | 9.000940  | 1.153890  | -4.309930  | C  | -7.857110 | 1.942040  | -10.775640 | N  | -0.129640 | -0.875310  | -4.101150  |
| C  | 7.517450  | -0.081550 | -5.230480  | H  | -8.945690 | 2.096270  | -10.803290 | H  | 0.277790  | 0.067190   | -4.147250  |
| H  | 7.777970  | -0.902850 | -4.554700  | C  | -7.563300 | 0.460120  | -10.904240 | C  | 0.506530  | -1.941690  | -4.426160  |
| O  | 6.102420  | -0.079720 | -5.440640  | C  | -7.888820 | -0.355890 | -9.651850  | N  | 0.085810  | -3.199030  | -4.435980  |
| C  | 5.784800  | -0.263480 | -6.816120  | H  | -6.560580 | -0.384840 | -8.906780  | N  | 1.772750  | -1.648680  | -4.746670  |
| H  | 5.440860  | -1.283190 | -6.998490  | H  | -6.450240 | -1.255260 | -8.258200  | H  | 2.156360  | -0.703710  | -4.690620  |
| N  | 4.658800  | 0.612540  | -7.127170  | H  | -6.454330 | 0.528200  | -8.317570  | H  | 2.369080  | -2.401260  | -5.053650  |
| C  | 4.836490  | 1.964350  | -7.069050  | C  | -5.543280 | -0.400020 | -10.046650 | H  | -3.964920 | -4.860280  | -3.385000  |
| H  | 5.848410  | 2.304400  | -6.877970  | N  | -4.309210 | 0.308530  | -9.760860  | C  | -1.205850 | -3.313110  | -4.066190  |
| C  | 3.804090  | 2.819740  | -7.219740  | C  | -4.192970 | 1.653950  | -9.466780  | H  | -0.398610 | -5.708700  | -4.530070  |
| H  | 3.942320  | 3.891450  | -7.179290  | H  | -5.074050 | 2.247470  | -9.257680  | H  | -2.290470 | -8.921220  | -3.465980  |
| C  | 2.499690  | 2.242370  | -7.353860  | N  | -2.959330 | 2.081490  | -9.501790  | O  | -0.399860 | -8.612930  | -4.243320  |
| N  | 2.321280  | 0.917240  | -7.409110  | C  | -2.220960 | 0.966960  | -9.857200  | C  | 0.198000  | -9.270090  | -3.139990  |
| N  | 1.433280  | 3.035290  | -7.414090  | O  | -0.815880 | 0.797590  | -10.015440 | H  | 0.347950  | -8.592480  | -2.291870  |
| H  | 1.551480  | 4.032100  | -7.312900  | C  | 0.067480  | 1.659540  | -9.880060  | H  | -0.418820 | -10.115390 | -2.810260  |
| H  | 0.489660  | 2.643410  | -7.375280  | N  | -0.484860 | -0.511340 | -10.346660 | H  | 1.168120  | -9.639550  | -3.473860  |
| C  | 3.377310  | 0.072600  | -7.303770  | H  | 0.530440  | -0.714400 | -10.423500 | O  | -2.192660 | -6.292360  | -5.395430  |
| O  | 3.242020  | -1.161260 | -7.362450  | C  | -1.379500 | -1.543560 | -10.479680 | H  | -1.769170 | -8.192720  | -5.117010  |
| C  | 7.067760  | 0.041710  | -7.586030  | N  | -2.687700 | -1.403880 | -10.335380 | H  | -3.916280 | -9.165680  | -5.404510  |
| H  | 7.157280  | 1.105630  | -7.813510  | N  | -0.860270 | -2.742270 | -10.809600 | H  | -4.161770 | -7.725340  | -6.423280  |
| H  | 7.131700  | -0.509460 | -8.522010  | H  | 0.135770  | -2.913410 | -10.656140 | O  | -6.979910 | -7.418710  | -5.266430  |
| C  | 8.165820  | -0.336080 | -6.599880  | H  | -1.487200 | -3.528590 | -10.721120 | Na | -8.381600 | -6.735660  | -3.489550  |
| O  | 8.502810  | -1.732650 | -6.626450  | C  | -3.041060 | -0.140290 | -10.021670 | H  | -7.137850 | -4.883910  | -6.270530  |
| P  | 9.057260  | -2.465560 | -7.965950  | H  | -5.248480 | -1.418400 | -10.317370 | O  | -4.834810 | -3.270810  | -7.905400  |
| O  | 10.136580 | -3.430020 | -7.540010  | H  | -8.706890 | 0.073560  | -9.069760  | H  | -5.150600 | -5.299850  | -8.210670  |
| Na | 11.634610 | -2.391510 | -9.069530  | O  | -8.258660 | -1.667350 | -10.109990 | H  | -7.377930 | -5.155320  | -8.971170  |
| O  | 7.740950  | -3.276510 | -8.472070  | P  | -9.018770 | -2.708440 | -9.124500  | H  | -6.562620 | -3.788630  | -9.739530  |
| C  | 7.213620  | -4.263400 | -7.570680  | O  | -9.889210 | -1.967570 | -8.138300  | O  | -9.562780 | -3.796520  | -9.993560  |
| H  | 6.918060  | -3.776130 | -6.635340  | Na | -9.160980 | -2.710690 | -6.146360  | O  | -6.170070 | 0.232900   | -11.155460 |
| H  | 7.976690  | -5.018730 | -7.359640  | O  | -7.808330 | -3.290650 | -8.180430  | H  | -8.130620 | 0.074110   | -11.756590 |
| C  | 6.008640  | -4.918150 | -8.203110  | C  | -6.880330 | -4.198980 | -8.787320  | H  | -7.415590 | 2.468010   | -11.634440 |
| H  | 5.647400  | -5.695890 | -7.520990  | C  | -5.699040 | -4.415660 | -7.867600  |    |           |            |            |
| O  | 4.988880  | -3.930830 | -8.387900  | C  | -6.087270 | -4.604800 | -6.388180  |    |           |            |            |
| C  | 4.530180  | -3.957190 | -9.734740  | C  | -5.716190 | -3.267020 | -5.764120  |    |           |            |            |
| H  | 3.639590  | -4.578610 | -9.821290  | H  | -5.556370 | -3.327400 | -4.689040  |    |           |            |            |
| N  | 4.124930  | -2.603120 | -10.085150 | H  | -6.477330 | -2.519300 | -5.999120  |    |           |            |            |
| C  | 5.051630  | -1.602210 | -10.038030 | C  | -4.459080 | -2.963170 | -6.563140  |    |           |            |            |
| H  | 6.068060  | -1.911650 | -9.818880  | H  | -3.628180 | -3.610450 | -6.251990  |    |           |            |            |



**Table 9S. M06-2X/6-31G(d,p) optimized reference geometry for trideoxyadenosine diphosphate d(A)<sub>3</sub> in Model 1.**

|   |            |           |           |
|---|------------|-----------|-----------|
| O | -7.501830  | -5.070790 | 4.327100  |
| C | -6.189240  | -5.137670 | 4.840600  |
| H | -6.198980  | -5.117500 | 5.941820  |
| H | -5.766150  | -6.089840 | 4.510260  |
| H | -5.563920  | -4.312660 | 4.485650  |
| C | -8.176270  | -3.870550 | 4.650130  |
| H | -7.884890  | -3.529580 | 5.656250  |
| H | -9.246860  | -4.106240 | 4.663390  |
| C | -7.944990  | -2.745120 | 3.654190  |
| H | -8.605700  | -1.906890 | 3.912210  |
| O | -6.582270  | -2.315840 | 3.720800  |
| C | -6.027410  | -2.349680 | 2.406040  |
| N | -4.599830  | -2.586160 | 2.528380  |
| C | -3.682250  | -1.675300 | 2.996960  |
| N | -3.893370  | -0.423660 | 3.412530  |
| C | -2.756000  | 0.186860  | 3.713580  |
| H | -2.844040  | 1.216350  | 4.053240  |
| N | -1.498330  | -0.285350 | 3.639250  |
| C | -1.327400  | -1.538260 | 3.217490  |
| N | -0.050740  | -2.034980 | 3.094280  |
| H | 0.614040   | -1.301800 | 2.883690  |
| H | -0.007080  | -2.807070 | 2.441520  |
| C | -2.449550  | -2.320520 | 2.906660  |
| N | -2.589180  | -3.593670 | 2.385060  |
| C | -3.877680  | -3.697870 | 2.174630  |
| H | -4.360070  | -4.551000 | 1.720180  |
| H | -6.167840  | -1.380960 | 1.910300  |
| C | -6.789490  | -3.458110 | 1.699710  |
| H | -6.498970  | -4.433630 | 2.102990  |
| H | -6.724850  | -3.431280 | 0.613040  |
| C | -8.200070  | -3.126390 | 2.184900  |
| H | -8.905810  | -3.959080 | 2.073460  |
| O | -8.680900  | -1.966560 | 1.550130  |
| P | -9.185810  | -2.097790 | -0.039070 |
| O | -10.447080 | -2.886710 | -0.065750 |
| O | -9.516750  | -0.506030 | -0.266280 |
| C | -9.105340  | 0.550870  | 0.573790  |
| H | -9.006410  | 0.217340  | 1.610440  |
| H | -9.894090  | 1.312860  | 0.523910  |
| C | -7.813760  | 1.221090  | 0.141430  |
| H | -7.725450  | 2.170380  | 0.688360  |
| O | -6.679020  | 0.401260  | 0.447330  |
| C | -5.820730  | 0.424180  | -0.687870 |
| N | -4.881990  | -0.673650 | -0.600720 |
| C | -3.562370  | -0.536320 | -0.249530 |
| N | -2.907280  | 0.577310  | 0.087540  |
| C | -1.616150  | 0.351750  | 0.290880  |
| H | -1.012480  | 1.217310  | 0.552080  |
| N | -0.950730  | -0.815800 | 0.221810  |
| C | -1.639400  | -1.910820 | -0.105950 |
| N | -0.954640  | -3.112890 | -0.207120 |
| H | -0.000100  | -3.011840 | 0.113630  |
| H | -1.455200  | -3.877190 | 0.234710  |
| C | -3.010480  | -1.814600 | -0.380580 |
| N | -3.962560  | -2.718880 | -0.814670 |
| C | -5.054430  | -1.994640 | -0.940760 |
| H | -6.036320  | -2.350910 | -1.243360 |
| H | -5.204930  | 1.333450  | -0.689640 |
| C | -6.790260  | 0.429490  | -1.861260 |
| H | -7.329970  | -0.523640 | -1.892780 |
| H | -6.341070  | 0.672900  | -2.822330 |
| C | -7.721790  | 1.535250  | -1.366030 |
| O | -7.098730  | 2.810180  | -1.464070 |
| P | -7.024900  | 3.587670  | -2.921710 |
| O | -6.485100  | 5.026760  | -2.308770 |
| C | -5.391530  | 5.079430  | -1.422410 |
| H | -5.508360  | 4.349840  | -0.612330 |
| H | -5.412250  | 6.087320  | -0.992000 |

|   |           |           |           |
|---|-----------|-----------|-----------|
| C | -4.004950 | 4.868230  | -2.042920 |
| H | -3.287970 | 5.519730  | -1.514800 |
| O | -3.590600 | 3.520200  | -1.883670 |
| C | -2.639600 | 3.239480  | -2.882620 |
| H | -1.629290 | 3.538920  | -2.567650 |
| N | -2.593540 | 1.809870  | -3.074880 |
| C | -1.523260 | 0.960470  | -2.958000 |
| N | -0.241660 | 1.239730  | -2.680340 |
| C | 0.493010  | 0.132280  | -2.630500 |
| H | 1.549550  | 0.278980  | -2.410220 |
| N | 0.121330  | -1.144930 | -2.800910 |
| C | -1.170910 | -1.389030 | -3.062470 |
| N | -1.600170 | -2.680410 | -3.197370 |
| H | -1.046630 | -3.317180 | -2.636180 |
| H | -2.597010 | -2.783950 | -3.030640 |
| C | -2.057260 | -0.308760 | -3.185130 |
| N | -3.415130 | -0.253270 | -3.418980 |
| C | -3.694080 | 1.024520  | -3.348900 |
| H | -4.658370 | 1.511020  | -3.492270 |
| C | -3.110760 | 4.013050  | -4.123690 |
| H | -2.270260 | 4.325840  | -4.749450 |
| H | -3.800320 | 3.387030  | -4.691140 |
| C | -3.877690 | 5.205890  | -3.539310 |
| O | -3.175520 | 6.440610  | -3.642120 |
| C | -3.303660 | 7.013840  | -4.913010 |
| H | -2.756680 | 7.960760  | -4.950680 |
| H | -4.356930 | 7.208420  | -5.162730 |
| H | -2.882200 | 6.372550  | -5.702490 |
| H | -4.868520 | 5.292850  | -3.996160 |
| O | -8.390630 | 3.802910  | -3.464450 |
| O | -5.918950 | 2.991320  | -3.752170 |
| H | -8.697410 | 1.545960  | -1.862150 |
| O | -8.008280 | -2.484280 | -0.888190 |

**Table 10S. M06-2X/6-31G(d,p) optimized reference geometry for trideoxythymidine diphosphate d(T)<sub>3</sub> in Model 1.**

|   |          |           |           |
|---|----------|-----------|-----------|
| O | 6.889590 | -5.596850 | -4.165620 |
| C | 7.698850 | -4.519240 | -4.605950 |
| C | 7.498420 | -3.259130 | -3.773820 |
| C | 8.030710 | -3.331530 | -2.326240 |
| C | 6.760250 | -3.531400 | -1.516950 |
| H | 6.875260 | -3.128640 | -0.517680 |
| H | 6.545820 | -4.600840 | -1.442000 |
| C | 5.706160 | -2.812410 | -2.340880 |
| N | 4.362250 | -3.364710 | -2.173930 |
| C | 3.310360 | -2.505360 | -1.877060 |
| N | 2.095860 | -3.151880 | -1.705960 |
| C | 1.808530 | -4.508800 | -1.823560 |
| C | 2.969380 | -5.328580 | -2.161590 |
| C | 2.754030 | -6.802440 | -2.306900 |
| H | 2.336750 | -7.215910 | -1.384260 |
| H | 3.693950 | -7.314760 | -2.527770 |
| H | 2.034850 | -7.015730 | -3.104280 |
| O | 0.673430 | -4.928860 | -1.679780 |
| H | 1.333140 | -2.542760 | -1.438460 |
| O | 3.418090 | -1.302450 | -1.775730 |
| C | 4.160130 | -4.718100 | -2.319510 |
| H | 5.054650 | -5.271180 | -2.587230 |
| H | 5.633140 | -1.750320 | -2.084850 |
| H | 8.727260 | -4.167510 | -2.184890 |
| O | 8.673240 | -2.107230 | -2.067460 |
| P | 9.213480 | -1.749200 | -0.513990 |
| O | 8.906220 | -2.910810 | 0.373640  |
| O | 8.076530 | -0.594020 | -0.150820 |
| C | 8.057950 | 0.536660  | -1.003580 |
| C | 6.954100 | 1.484120  | -0.579120 |
| C | 7.081500 | 2.067760  | 0.835480  |
| C | 6.186240 | 1.148930  | 1.655230  |
| H | 5.813820 | 1.658750  | 2.543920  |
| H | 6.737670 | 0.248090  | 1.934820  |
| C | 5.078850 | 0.831190  | 0.649190  |

|   |           |           |           |
|---|-----------|-----------|-----------|
| N | 4.424700  | -0.454330 | 0.891150  |
| C | 5.196710  | -1.592800 | 0.996220  |
| C | 4.693610  | -2.822440 | 1.249380  |
| C | 5.532120  | -4.046340 | 1.465760  |
| H | 5.293250  | -4.486070 | 2.439440  |
| H | 6.599500  | -3.810930 | 1.426920  |
| H | 5.304940  | -4.810910 | 0.714040  |
| C | 3.246600  | -2.969760 | 1.358920  |
| O | 2.654890  | -4.019370 | 1.559650  |
| N | 2.544200  | -1.776820 | 1.200050  |
| H | 1.556020  | -1.801270 | 1.419040  |
| H | 6.265520  | -1.431180 | 0.858620  |
| C | 3.041900  | -0.510700 | 0.940020  |
| O | 2.299770  | 0.446050  | 0.811980  |
| H | 4.287260  | 1.585780  | 0.665600  |
| H | 8.116590  | 2.103370  | 1.191550  |
| O | 6.530000  | 3.375740  | 0.800680  |
| P | 6.766800  | 4.342870  | 2.125320  |
| O | 5.703690  | 4.056000  | 3.155150  |
| O | 8.207880  | 4.375450  | 2.484360  |
| O | 6.394610  | 5.760900  | 1.363730  |
| C | 5.275030  | 5.869650  | 0.517330  |
| C | 3.915780  | 5.835580  | 1.210070  |
| C | 3.885420  | 6.429200  | 2.631520  |
| C | 3.007870  | 5.445600  | 3.417670  |
| H | 3.634200  | 4.860850  | 4.092100  |
| H | 2.215140  | 5.953200  | 3.974780  |
| C | 2.431980  | 4.545110  | 2.315080  |
| N | 2.128980  | 3.190340  | 2.738410  |
| C | 3.140230  | 2.410220  | 3.275130  |
| C | 2.939180  | 1.145300  | 3.701800  |
| C | 4.012960  | 0.271090  | 4.276170  |
| H | 3.668090  | -0.187840 | 5.207630  |
| H | 4.917670  | 0.848940  | 4.474690  |
| H | 4.265370  | -0.549330 | 3.593680  |
| C | 1.614670  | 0.558610  | 3.536060  |
| O | 1.308880  | -0.597930 | 3.788550  |
| N | 0.647180  | 1.448760  | 3.073330  |
| H | -0.262720 | 1.053280  | 2.880490  |
| H | 4.116020  | 2.908200  | 3.302290  |
| C | 0.835490  | 2.722960  | 2.580970  |
| O | -0.082270 | 3.371170  | 2.106570  |
| H | 1.494840  | 4.953090  | 1.921660  |
| H | 4.897010  | 6.469520  | 3.048080  |
| O | 3.335130  | 7.737780  | 2.537330  |
| C | 3.573250  | 8.493970  | 3.691500  |
| H | 3.107830  | 8.046970  | 4.583510  |
| H | 4.650120  | 8.599020  | 3.889080  |
| H | 3.140070  | 9.485360  | 3.533160  |
| O | 3.418020  | 4.511730  | 1.309280  |
| H | 3.209030  | 6.433560  | 0.607950  |
| H | 5.367480  | 6.847500  | 0.030370  |
| H | 5.287630  | 5.089460  | -0.252530 |
| O | 5.705010  | 0.790010  | -0.619430 |
| H | 6.920810  | 2.321250  | -1.288220 |
| H | 9.028730  | 1.047650  | -0.976620 |
| H | 7.864540  | 0.211650  | -2.034710 |
| O | 10.542480 | -1.107350 | -0.675380 |
| O | 6.098570  | -2.983970 | -3.701590 |
| H | 8.015140  | -2.426690 | -4.268260 |
| H | 8.748190  | -4.830730 | -4.538810 |
| H | 7.479730  | -4.300550 | -5.660900 |
| C | 5.756150  | -5.782040 | -4.983780 |
| H | 5.172670  | -6.602300 | -4.556000 |
| H | 5.137180  | -4.878170 | -5.018850 |
| H | 6.051060  | -6.058650 | -6.007540 |

**Table 11S. M06-2X/6-31G(d,p) optimized reference geometry for trioxoadenosine diphosphate d(A)<sub>3</sub> in Model 2.**

|   |           |           |           |
|---|-----------|-----------|-----------|
| O | -7.177616 | 0.098901  | -0.285579 |
| C | -6.941537 | -0.697253 | -1.422647 |
| H | -7.219259 | -0.157296 | -2.340159 |
| H | -7.537825 | -1.623555 | -1.372758 |
| C | -5.467012 | -1.043213 | -1.488584 |
| H | -5.315812 | -1.840235 | -2.227460 |
| O | -4.731613 | 0.115993  | -1.860641 |
| C | -3.651169 | 0.277806  | -0.943168 |
| N | -3.212901 | 1.645719  | -0.946781 |
| C | -2.299582 | 2.152553  | -1.844711 |
| N | -1.630683 | 1.489441  | -2.790721 |
| C | -0.814203 | 2.297546  | -3.455867 |
| H | -0.225744 | 1.837263  | -4.245876 |
| N | -0.606735 | 3.612318  | -3.280706 |
| C | -1.289844 | 4.240990  | -2.319572 |
| N | -1.086564 | 5.573974  | -2.129133 |
| H | -0.231861 | 5.920332  | -2.541092 |
| H | -1.277167 | 5.902044  | -1.193201 |
| C | -2.208463 | 3.507576  | -1.544758 |
| N | -3.040913 | 3.843637  | -0.491331 |
| C | -3.620443 | 2.714753  | -0.180488 |
| H | -4.343587 | 2.587910  | 0.613075  |
| H | -2.789391 | -0.319711 | -1.260187 |
| C | -4.223300 | -0.230296 | 0.371431  |
| H | -5.001197 | 0.449522  | 0.728633  |
| H | -3.480699 | -0.421840 | 1.139693  |
| C | -4.892183 | -1.500473 | -0.133031 |
| H | -5.658762 | -1.909521 | 0.533225  |
| O | -3.905328 | -2.498661 | -0.422242 |
| P | -3.233466 | -3.363162 | 0.764351  |
| O | -2.028818 | -4.062665 | -0.037006 |
| C | -1.581013 | -3.723387 | -1.348896 |
| H | -2.392427 | -3.279872 | -1.929563 |
| H | -1.272202 | -4.662907 | -1.816633 |
| C | -0.400185 | -2.775655 | -1.313093 |
| H | 0.038809  | -2.730488 | -2.319113 |
| O | -0.832258 | -1.480285 | -0.912490 |
| C | 0.161430  | -0.956175 | -0.030398 |
| H | 1.029989  | -0.597262 | -0.599333 |
| N | -0.352715 | 0.186861  | 0.664599  |
| C | -0.006001 | 1.490700  | 0.386287  |
| N | 0.843194  | 1.936771  | -0.541079 |
| C | 0.972264  | 3.258387  | -0.486411 |
| H | 1.652145  | 3.702504  | -1.209014 |
| N | 0.362360  | 4.124959  | 0.341916  |
| C | -0.475498 | 3.640533  | 1.260480  |
| N | -1.066676 | 4.503524  | 2.145451  |
| H | -1.013331 | 5.470612  | 1.857308  |
| H | -1.978899 | 4.207699  | 2.465132  |
| C | -0.687840 | 2.253592  | 1.329630  |
| N | -1.420464 | 1.452004  | 2.187526  |
| C | -1.179678 | 0.236485  | 1.762485  |
| H | -1.590065 | -0.677179 | 2.174784  |
| C | 0.514261  | -2.177529 | 0.812770  |
| H | -0.358903 | -2.461785 | 1.409999  |
| H | 1.398357  | -2.062552 | 1.435758  |
| C | 0.708683  | -3.183251 | -0.316044 |
| O | 1.952550  | -2.941727 | -0.986771 |
| P | 3.348812  | -3.460548 | -0.365224 |
| O | 4.362280  | -2.961351 | -1.505836 |
| C | 4.102782  | -1.964992 | -2.494565 |
| H | 3.038103  | -1.932798 | -2.736100 |
| H | 4.665814  | -2.271088 | -3.380739 |
| C | 4.575084  | -0.592153 | -2.064346 |
| H | 4.618969  | 0.054813  | -2.952051 |
| O | 3.666535  | -0.045497 | -1.116462 |
| C | 4.431609  | 0.756593  | -0.228578 |
| H | 4.690626  | 1.721254  | -0.684746 |

|    |           |           |           |
|----|-----------|-----------|-----------|
| N  | 3.638878  | 1.048748  | 0.932331  |
| C  | 3.327642  | 2.285396  | 1.447965  |
| N  | 3.771098  | 3.485776  | 1.062365  |
| C  | 3.238837  | 4.455894  | 1.802380  |
| H  | 3.558470  | 5.466738  | 1.559805  |
| N  | 2.345651  | 4.362682  | 2.796855  |
| C  | 1.900155  | 3.147317  | 3.135152  |
| N  | 0.941720  | 3.031538  | 4.096414  |
| H  | 0.386248  | 3.871546  | 4.196507  |
| H  | 0.400875  | 2.176416  | 4.047292  |
| C  | 2.429460  | 2.021388  | 2.480055  |
| N  | 2.179342  | 0.666956  | 2.598793  |
| C  | 2.924510  | 0.130467  | 1.666645  |
| H  | 3.040390  | -0.925694 | 1.451711  |
| C  | 5.670767  | -0.102020 | 0.014948  |
| H  | 5.379788  | -0.955662 | 0.637270  |
| H  | 6.492458  | 0.445821  | 0.480194  |
| C  | 5.977022  | -0.573410 | -1.407961 |
| O  | 6.758727  | 0.357046  | -2.130630 |
| C  | 8.129011  | 0.289303  | -1.822356 |
| H  | 8.639011  | 1.013111  | -2.459635 |
| H  | 8.531933  | -0.714066 | -2.022952 |
| H  | 8.333013  | 0.539842  | -0.772607 |
| H  | 6.449238  | -1.565191 | -1.431159 |
| O  | 3.383394  | -4.968000 | -0.246667 |
| Na | 3.980129  | -4.787773 | 1.857535  |
| O  | 3.663710  | -2.802186 | 0.973629  |
| H  | 0.646304  | -4.233706 | -0.015129 |
| O  | -4.189395 | -4.404216 | 1.303775  |
| Na | -3.874211 | -3.664243 | 3.334780  |
| O  | -2.695412 | -2.486129 | 1.889783  |
| C  | -8.506467 | 0.552480  | -0.220205 |
| H  | -8.760248 | 1.169818  | -1.092825 |
| H  | -9.215525 | -0.286839 | -0.169719 |
| H  | -8.603712 | 1.155988  | 0.683613  |

**Table 12S. M06-2X/6-31G(d,p) optimized reference geometry for trioxothymidine diphosphate d(T)<sub>3</sub> in Model 2.**

|    |           |           |           |
|----|-----------|-----------|-----------|
| O  | -6.921104 | -1.982261 | -0.694664 |
| C  | -8.313169 | -2.195815 | -0.715295 |
| H  | -8.741176 | -1.650563 | 0.127520  |
| H  | -8.553732 | -3.263121 | -0.612661 |
| H  | -8.757839 | -1.824704 | -1.648741 |
| C  | -6.260009 | -2.644264 | -1.750708 |
| C  | -4.791643 | -2.265466 | -1.723953 |
| C  | -4.154866 | -2.405914 | -0.331823 |
| C  | -4.195563 | -0.983168 | 0.200447  |
| H  | -3.413740 | -0.796372 | 0.936535  |
| H  | -5.180610 | -0.780471 | 0.629057  |
| C  | -4.000559 | -0.164058 | -1.076647 |
| H  | -2.943696 | -0.022785 | -1.318319 |
| N  | -4.594437 | 1.157653  | -0.994806 |
| C  | -3.772389 | 2.272456  | -1.106805 |
| O  | -2.600792 | 2.211856  | -1.427954 |
| N  | -4.399467 | 3.458797  | -0.792718 |
| H  | -3.774343 | 4.251276  | -0.681880 |
| C  | -5.745913 | 3.664994  | -0.486384 |
| O  | -6.168741 | 4.772756  | -0.222489 |
| C  | -6.564320 | 2.448223  | -0.524497 |
| C  | -8.032819 | 2.603412  | -0.280827 |
| H  | -8.211139 | 3.057687  | 0.697833  |
| H  | -8.541612 | 1.637582  | -0.325267 |
| H  | -8.477082 | 3.272529  | -1.023080 |
| C  | -5.953359 | 1.273804  | -0.760051 |
| H  | -6.489128 | 0.328182  | -0.800531 |
| O  | -2.798716 | -2.822986 | -0.517563 |
| P  | -2.004363 | -3.384663 | 0.774595  |
| O  | -1.718060 | -2.292564 | 1.801208  |
| O  | -2.756667 | -4.534364 | 1.409971  |
| Na | -2.676243 | -3.538084 | 3.351795  |
| O  | -0.651279 | -3.896411 | 0.086031  |

|    |           |           |           |
|----|-----------|-----------|-----------|
| C  | -0.206530 | -3.577643 | -1.233161 |
| C  | 0.721969  | -2.383722 | -1.233817 |
| C  | 1.799981  | -2.428670 | -0.122026 |
| C  | 1.395545  | -1.270148 | 0.783548  |
| H  | 2.249068  | -0.866156 | 1.325639  |
| H  | 0.598121  | -1.586841 | 1.463917  |
| C  | 0.837949  | -0.323552 | -0.276475 |
| N  | 0.095873  | 0.825736  | 0.171596  |
| C  | -0.965744 | 0.686713  | 1.047516  |
| C  | -1.728142 | 1.722690  | 1.447749  |
| C  | -2.912297 | 1.595296  | 2.355915  |
| H  | -2.852481 | 2.326914  | 3.165890  |
| H  | -2.966822 | 0.589345  | 2.781466  |
| H  | -3.845045 | 1.798602  | 1.814040  |
| C  | -1.454407 | 3.048527  | 0.891802  |
| O  | -2.143304 | 4.037320  | 1.075147  |
| N  | -0.317522 | 3.110083  | 0.094474  |
| H  | -0.140184 | 3.995894  | -0.361901 |
| H  | -1.156471 | -0.335080 | 1.372741  |
| C  | 0.431376  | 2.060246  | -0.385632 |
| O  | 1.328127  | 2.215988  | -1.191343 |
| H  | 1.651039  | 0.061080  | -0.902326 |
| O  | 3.050455  | -2.142813 | -0.755751 |
| P  | 4.437644  | -2.402326 | 0.025637  |
| O  | 4.733460  | -1.342911 | 1.084214  |
| O  | 4.488608  | -3.792914 | 0.619333  |
| Na | 5.104833  | -2.952028 | 2.542419  |
| O  | 5.456437  | -2.293488 | -1.210859 |
| C  | 5.248821  | -1.437543 | -2.333135 |
| C  | 5.474031  | 0.029786  | -2.037589 |
| C  | 6.745224  | 0.344229  | -1.219991 |
| C  | 6.272471  | 1.438403  | -0.248969 |
| H  | 6.949260  | 2.295369  | -0.221202 |
| H  | 6.154223  | 1.029416  | 0.757706  |
| C  | 4.893394  | 1.811807  | -0.806013 |
| N  | 3.971842  | 2.351222  | 0.167551  |
| C  | 3.524460  | 1.541606  | 1.188421  |
| C  | 2.624046  | 1.942271  | 2.109702  |
| C  | 2.120924  | 1.082667  | 3.228459  |
| H  | 2.182980  | 1.622511  | 4.177163  |
| H  | 2.703365  | 0.160302  | 3.301330  |
| H  | 1.065899  | 0.824215  | 3.077201  |
| C  | 2.087313  | 3.298685  | 2.022929  |
| O  | 1.269991  | 3.777503  | 2.787527  |
| N  | 2.605308  | 4.046874  | 0.964143  |
| H  | 2.266620  | 4.996416  | 0.873991  |
| H  | 3.955517  | 0.540221  | 1.181909  |
| C  | 3.507504  | 3.652116  | -0.006990 |
| O  | 3.886751  | 4.394569  | -0.887061 |
| H  | 4.970510  | 2.557463  | -1.603410 |
| H  | 7.085601  | -0.547963 | -0.676884 |
| O  | 7.734379  | 0.761897  | -2.134310 |
| C  | 9.022124  | 0.793071  | -1.571577 |
| H  | 9.087622  | 1.501896  | -0.734106 |
| H  | 9.322384  | -0.200533 | -1.208354 |
| H  | 9.711836  | 1.111343  | -2.354762 |
| O  | 4.388337  | 0.586857  | -1.317022 |
| H  | 5.582684  | 0.552350  | -3.002055 |
| H  | 5.988314  | -1.751625 | -3.074071 |
| H  | 4.243573  | -1.586494 | -2.736482 |
| H  | 1.855510  | -3.400491 | 0.376734  |
| O  | -0.016897 | -1.187819 | -1.028400 |
| H  | 1.239278  | -2.343341 | -2.203220 |
| H  | 0.339840  | -4.456999 | -1.585148 |
| H  | -1.058103 | -3.389806 | -1.890219 |
| H  | -4.681161 | -3.137018 | 0.290865  |
| O  | -4.660657 | -0.899944 | -2.096436 |
| H  | -4.244082 | -2.895440 | -2.435149 |
| H  | -6.368339 | -3.735631 | -1.645347 |
| H  | -6.686417 | -2.344035 | -2.719301 |

**Table 13S. M06-2X/6-31G(d,p) optimized reference geometry for trideoxyadenosine diphosphate d(A)<sub>3</sub> in Model 3.**

|   |           |           |           |
|---|-----------|-----------|-----------|
| O | 0.350450  | 7.939437  | 0.948869  |
| C | -0.298351 | 8.849009  | 1.816725  |
| H | -0.376747 | 8.436310  | 2.830564  |
| H | 0.244442  | 9.801459  | 1.866785  |
| H | -1.298777 | 9.023901  | 1.419476  |
| C | 1.667649  | 7.657665  | 1.372074  |
| H | 1.662036  | 7.231091  | 2.385739  |
| H | 2.273337  | 8.575369  | 1.390443  |
| C | 2.292134  | 6.669578  | 0.411397  |
| H | 3.350406  | 6.542015  | 0.664625  |
| O | 1.611708  | 5.410291  | 0.528030  |
| C | 1.284170  | 4.951799  | -0.778589 |
| N | 0.187040  | 4.019818  | -0.673426 |
| C | 0.322534  | 2.739992  | -0.192695 |
| N | 1.448195  | 2.129359  | 0.204262  |
| C | 1.209209  | 0.877750  | 0.585850  |
| H | 2.073574  | 0.307077  | 0.198074  |
| N | 0.042216  | 0.217554  | 0.609825  |
| C | -1.070030 | 0.856571  | 0.203458  |
| N | -2.246903 | 0.204410  | 0.236407  |
| H | -2.236687 | -0.793962 | 0.383394  |
| H | -3.047679 | 0.604857  | -0.227786 |
| C | -0.956979 | 2.199763  | -0.214414 |
| N | -1.870571 | 3.119721  | -0.694888 |
| C | -1.149896 | 4.183783  | -0.949023 |
| H | -1.534420 | 5.111288  | -1.348734 |
| H | 2.133696  | 4.394876  | -1.195847 |
| C | 1.017283  | 6.222094  | -1.570427 |
| H | 0.073263  | 6.671317  | -1.254924 |
| H | 1.039174  | 6.075459  | -2.649567 |
| C | 2.174336  | 7.077391  | -1.069821 |
| H | 2.013068  | 8.152748  | -1.185649 |
| O | 3.374495  | 6.671604  | -1.735103 |
| P | 3.940584  | 7.613280  | -2.952206 |
| O | 4.287444  | 8.964781  | -2.396867 |
| O | 5.278737  | 6.741165  | -3.273815 |
| C | 6.211116  | 6.507197  | -2.214411 |
| H | 5.785288  | 6.811028  | -1.253971 |
| C | 6.551124  | 5.030074  | -2.165428 |
| H | 7.237221  | 4.863597  | -1.327787 |
| O | 5.351178  | 4.276072  | -1.953376 |
| C | 5.175627  | 3.313415  | -2.984776 |
| H | 5.479343  | 2.321399  | -2.634473 |
| N | 3.761690  | 3.209564  | -3.289343 |
| C | 2.940571  | 2.141777  | -3.007279 |
| N | 3.271092  | 0.947331  | -2.492727 |
| C | 2.209717  | 0.157652  | -2.368627 |
| H | 2.395441  | -0.834686 | -1.963147 |
| N | 0.926963  | 0.421597  | -2.667259 |
| C | 0.621383  | 1.628762  | -3.170929 |
| N | -0.661894 | 1.906109  | -3.484490 |
| H | -1.373678 | 1.302085  | -3.097202 |
| H | -0.917601 | 2.871638  | -3.633473 |
| C | 1.666203  | 2.552111  | -3.385212 |
| N | 1.690433  | 3.834143  | -3.895283 |
| C | 2.951737  | 4.186391  | -3.816204 |
| H | 3.342773  | 5.150006  | -4.118172 |
| C | 6.033524  | 3.787883  | -4.152391 |
| H | 5.485089  | 4.513133  | -4.757930 |
| H | 6.360833  | 2.956369  | -4.775519 |
| C | 7.192248  | 4.481682  | -3.448832 |
| O | 8.206434  | 3.553521  | -3.046068 |
| P | 9.163052  | 2.861294  | -4.183717 |
| O | 10.401715 | 2.427696  | -3.459462 |
| O | 8.286292  | 1.541242  | -4.602255 |
| C | 8.085468  | 0.551666  | -3.593704 |
| H | 7.694730  | 1.017159  | -2.681244 |
| H | 9.033096  | 0.054970  | -3.360819 |

|   |           |           |           |
|---|-----------|-----------|-----------|
| C | 7.101367  | -0.472247 | -4.102923 |
| H | 7.049780  | -1.300183 | -3.384964 |
| O | 5.811024  | 0.137578  | -4.225929 |
| C | 5.180027  | -0.455329 | -5.351955 |
| H | 4.773262  | -1.439426 | -5.091067 |
| N | 4.051934  | 0.351961  | -5.746253 |
| C | 2.734683  | -0.044897 | -5.743019 |
| N | 2.222755  | -1.233988 | -5.392930 |
| C | 0.899357  | -1.253114 | -5.525258 |
| H | 0.406614  | -2.185166 | -5.258507 |
| N | 0.083330  | -0.271655 | -5.939730 |
| C | 0.624234  | 0.908549  | -6.287473 |
| N | -0.177645 | 1.901087  | -6.730046 |
| H | -1.165625 | 1.812035  | -6.538522 |
| H | 0.197329  | 2.839070  | -6.737899 |
| C | 2.022660  | 1.055271  | -6.207302 |
| N | 2.867049  | 2.113105  | -6.482836 |
| C | 4.058066  | 1.650722  | -6.196317 |
| H | 4.978469  | 2.207593  | -6.299756 |
| C | 6.301437  | -0.578022 | -6.374858 |
| H | 6.533966  | 0.407985  | -6.786488 |
| H | 6.063026  | -1.264815 | -7.187841 |
| C | 7.451716  | -1.061281 | -5.489202 |
| O | 7.473457  | -2.471979 | -5.353912 |
| C | 8.073123  | -3.122304 | -6.460195 |
| H | 8.060232  | -4.192333 | -6.250105 |
| H | 9.110462  | -2.789703 | -6.591624 |
| H | 7.524925  | -2.934984 | -7.390772 |
| H | 8.426759  | -0.707911 | -5.845893 |
| O | 9.213988  | 3.721476  | -5.409097 |
| H | 7.643359  | 5.269689  | -4.056339 |
| H | 7.119705  | 7.089049  | -2.396003 |
| O | 3.061226  | 7.498113  | -4.164645 |

**Table 14S. M06-2X/6-31G(d,p) optimized reference geometry for trideoxythymidine diphosphate d(T)<sub>3</sub> in Model 3.**

|   |           |           |           |
|---|-----------|-----------|-----------|
| O | -7.725433 | -2.115478 | -6.666543 |
| C | -8.720397 | -1.111060 | -6.738147 |
| H | -8.678317 | -0.543792 | -5.807588 |
| H | -9.717332 | -1.554844 | -6.849766 |
| H | -8.536642 | -0.437015 | -7.584265 |
| C | -7.699660 | -2.925746 | -7.824163 |
| C | -6.553830 | -3.912246 | -7.727187 |
| C | -6.479528 | -4.648451 | -6.684381 |
| C | -5.450559 | -3.835878 | -5.610098 |
| H | -4.935136 | -4.420410 | -4.850195 |
| H | -5.946929 | -2.985964 | -5.136788 |
| C | -4.505341 | -3.357672 | -6.708784 |
| N | -3.888055 | -2.058717 | -6.439121 |
| C | -2.515528 | -1.955539 | -6.376212 |
| N | -2.053342 | -0.678367 | -6.155103 |
| H | -1.044858 | -0.590893 | -6.084011 |
| C | -2.800264 | 0.471155  | -5.947034 |
| O | -2.240663 | 1.538830  | -5.712789 |
| C | -4.239688 | 0.288272  | -6.047446 |
| C | -5.119141 | 1.487531  | -5.870925 |
| H | -4.971300 | 1.930203  | -4.881186 |
| H | -6.170574 | 1.214386  | -5.976885 |
| H | -4.880591 | 2.257794  | -6.610330 |
| O | -1.746941 | -2.903419 | -6.498681 |
| C | -4.703414 | -0.952849 | -6.298894 |
| H | -5.763815 | -1.163991 | -6.414593 |
| H | -3.684200 | -4.058698 | -6.871105 |
| H | -7.447985 | -4.688600 | -5.880727 |
| O | -6.026425 | -5.978862 | -6.657272 |
| P | -5.840191 | -7.036996 | -5.417270 |
| O | -6.576430 | -6.549064 | -4.207074 |
| O | -4.245503 | -6.862368 | -5.075602 |
| C | -3.318032 | -7.296377 | -6.072012 |
| C | -1.914356 | -7.129877 | -5.535939 |
| C | -1.698424 | -7.792765 | -4.162961 |

|   |           |            |           |
|---|-----------|------------|-----------|
| C | -1.691268 | -6.611030  | -3.201932 |
| H | -1.097086 | -6.804581  | -2.313166 |
| H | -2.719250 | -6.390822  | -2.909568 |
| C | -1.097951 | -5.510976  | -4.070420 |
| N | -1.398867 | -4.142092  | -3.675130 |
| C | -0.424419 | -3.177568  | -3.876795 |
| N | -0.824872 | -1.893887  | -3.588823 |
| H | -0.103239 | -1.185922  | -3.675927 |
| C | -2.084334 | -1.462766  | -3.208443 |
| O | -2.289678 | -0.273144  | -2.977798 |
| C | -3.087031 | -2.513091  | -3.117695 |
| C | -4.477180 | -2.123183  | -2.722501 |
| H | -4.466141 | -1.624434  | -1.748507 |
| H | -5.123644 | -3.000389  | -2.661027 |
| H | -4.901793 | -1.420683  | -3.448379 |
| O | 0.713106  | -3.421122  | -4.257211 |
| C | -2.693219 | -3.780874  | -3.356340 |
| H | -3.395489 | -4.603229  | -3.291220 |
| H | -0.009051 | -5.587973  | -4.095324 |
| H | -2.486633 | -8.511508  | -3.929253 |
| O | -0.437140 | -8.471716  | -4.193152 |
| P | 0.065167  | -9.266678  | -2.846850 |
| O | -1.090864 | -9.495180  | -1.920695 |
| O | 0.999539  | -8.129386  | -2.122181 |
| C | 2.229077  | -7.804621  | -2.770251 |
| C | 2.797044  | -6.543426  | -2.166974 |
| C | 3.032531  | -6.562927  | -0.658712 |
| C | 2.950395  | -5.072534  | -0.301537 |
| H | 3.951540  | -4.641898  | -0.392594 |
| H | 2.565472  | -4.872028  | 0.698765  |
| C | 2.037378  | -4.479096  | -1.387781 |
| N | 0.694308  | -4.120018  | -0.914517 |
| C | 0.342150  | -2.788366  | -0.862803 |
| N | -0.957324 | -2.560219  | -0.470836 |
| H | -1.241534 | -1.585616  | -0.543193 |
| C | -1.923855 | -3.501384  | -0.146287 |
| O | -3.058879 | -3.144416  | 0.160705  |
| C | -1.472061 | -4.882167  | -0.201042 |
| C | -2.452340 | -5.964244  | 0.130787  |
| H | -2.792991 | -5.879776  | 1.167107  |
| H | -2.004646 | -6.949787  | -0.013445 |
| H | -3.336637 | -5.886513  | -0.510213 |
| O | 1.104843  | -1.869823  | -1.141641 |
| C | -0.197945 | -5.114808  | -0.578535 |
| H | 0.189303  | -6.124942  | -0.669152 |
| H | 2.446696  | -3.567506  | -1.821301 |
| H | 2.237073  | -7.133410  | -0.157387 |
| O | 4.281710  | -7.161138  | -0.408668 |
| C | 4.524694  | -7.358760  | 0.973818  |
| H | 4.584707  | -6.403607  | 1.508996  |
| H | 5.479053  | -7.878661  | 1.062890  |
| H | 3.733635  | -7.969320  | 1.426570  |
| O | 1.881158  | -5.473908  | -2.384445 |
| H | 3.756673  | -6.329740  | -2.659729 |
| H | 2.952596  | -8.616505  | -2.643020 |
| H | 2.057762  | -7.647037  | -3.841430 |
| O | 0.936425  | -10.387315 | -3.328586 |
| O | -1.648073 | -5.731865  | -5.365130 |
| H | -1.208368 | -7.554081  | -6.258037 |
| H | -3.492534 | -8.349429  | -6.314460 |
| H | -3.441903 | -6.696610  | -6.981395 |
| O | -6.078059 | -8.398248  | -5.998227 |
| O | -5.298964 | -3.229568  | -7.877874 |
| H | -6.652330 | -4.637607  | -8.540353 |
| H | -8.645080 | -3.478287  | -7.922994 |
| H | -7.568086 | -2.306958  | -8.723351 |

**Table 15S. M06-2X/6-31G(d,p) optimized reference geometry for trideoxyadenosine diphosphate d(A)<sub>3</sub> in Model 4.**

|    |           |           |           |
|----|-----------|-----------|-----------|
| O  | -0.299050 | 7.775606  | -1.285674 |
| C  | 0.188682  | 8.384375  | -0.108220 |
| H  | -0.512695 | 8.224368  | 0.722878  |
| H  | 0.306139  | 9.468069  | -0.255240 |
| C  | 1.531837  | 7.781336  | 0.251092  |
| H  | 1.951068  | 8.340096  | 1.093591  |
| O  | 1.367209  | 6.412769  | 0.647971  |
| C  | 2.009251  | 5.537289  | -0.268050 |
| N  | 1.127651  | 4.416271  | -0.539193 |
| C  | 1.283190  | 3.135627  | -0.064485 |
| N  | 2.344181  | 2.606419  | 0.562278  |
| C  | 2.134755  | 1.333777  | 0.886281  |
| H  | 2.950995  | 0.831476  | 1.399836  |
| N  | 1.047447  | 0.581130  | 0.664112  |
| C  | -0.000211 | 1.134790  | 0.027863  |
| N  | -1.112689 | 0.393155  | -0.163980 |
| H  | -1.022500 | -0.606642 | -0.049169 |
| H  | -1.780613 | 0.708863  | -0.852378 |
| C  | 0.093064  | 2.483163  | -0.372819 |
| N  | -0.791176 | 3.340720  | -1.002586 |
| C  | -0.139622 | 4.474912  | -1.073109 |
| H  | -0.523881 | 5.402841  | -1.479048 |
| H  | 2.902385  | 5.102357  | 0.189883  |
| C  | 2.353060  | 6.373718  | -1.495689 |
| H  | 1.521960  | 6.376346  | -2.202951 |
| H  | 3.252041  | 6.001854  | -1.984020 |
| C  | 2.528073  | 7.766667  | -0.911467 |
| O  | 3.842180  | 7.940380  | -0.348246 |
| P  | 5.122538  | 8.121290  | -1.332685 |
| O  | 6.212047  | 8.757953  | -0.507515 |
| Na | 6.357640  | 10.509497 | -2.112572 |
| O  | 5.524738  | 6.596802  | -1.730860 |
| C  | 5.953332  | 5.731095  | -0.672775 |
| H  | 5.277508  | 5.824288  | 0.184484  |
| H  | 6.966280  | 6.004029  | -0.361539 |
| C  | 5.947816  | 4.300909  | -1.159099 |
| H  | 6.397095  | 3.679634  | -0.376586 |
| O  | 4.598597  | 3.874791  | -1.389832 |
| C  | 4.538922  | 3.180418  | -2.631721 |
| H  | 4.765986  | 2.115767  | -2.488474 |
| N  | 3.190151  | 3.234434  | -3.138503 |
| C  | 2.271125  | 2.216856  | -3.032359 |
| N  | 2.451350  | 0.997792  | -2.505844 |
| C  | 1.364664  | 0.243666  | -2.644221 |
| H  | 1.434996  | -0.770397 | -2.255198 |
| N  | 0.184502  | 0.567260  | -3.195024 |
| C  | 0.027502  | 1.803214  | -3.701949 |
| N  | -1.147680 | 2.132928  | -4.270081 |
| H  | -1.932429 | 1.512046  | -4.137172 |
| H  | -1.343316 | 3.101446  | -4.473481 |
| C  | 1.122991  | 2.690343  | -3.653808 |
| N  | 1.325781  | 3.962248  | -4.158141 |
| C  | 2.566274  | 4.237590  | -3.839847 |
| H  | 3.079378  | 5.152960  | -4.097069 |
| C  | 5.591607  | 3.860401  | -3.488339 |
| H  | 5.240749  | 4.848760  | -3.796810 |
| H  | 5.880359  | 3.290979  | -4.369014 |
| C  | 6.714878  | 4.058276  | -2.477995 |
| O  | 7.513240  | 2.885889  | -2.249960 |
| P  | 8.187702  | 1.983250  | -3.416498 |
| O  | 9.526664  | 1.518008  | -2.899175 |
| Na | 10.579784 | 2.462360  | -4.804856 |
| O  | 7.154875  | 0.730407  | -3.515328 |
| C  | 6.982632  | -0.077025 | -2.340981 |
| H  | 6.417764  | 0.490386  | -1.593548 |
| H  | 7.959269  | -0.344969 | -1.925390 |
| C  | 6.227598  | -1.337699 | -2.700482 |
| H  | 6.165157  | -1.957959 | -1.800422 |

|   |           |           |           |
|---|-----------|-----------|-----------|
| O | 4.900118  | -1.007611 | -3.125906 |
| C | 4.687667  | -1.403041 | -4.473942 |
| H | 4.030076  | -2.276215 | -4.507011 |
| C | 6.067127  | -1.696462 | -5.060637 |
| H | 6.508679  | -0.783340 | -5.464611 |
| H | 6.020040  | -2.447204 | -5.850155 |
| N | 3.974736  | -0.341311 | -5.156735 |
| C | 4.415823  | 0.944440  | -5.355344 |
| H | 5.417032  | 1.235615  | -5.061063 |
| N | 3.521641  | 1.725800  | -5.910142 |
| C | 2.419947  | 0.907443  | -6.076262 |
| C | 1.119062  | 1.142842  | -6.562635 |
| N | 0.249906  | 0.118508  | -6.589928 |
| C | 0.648602  | -1.074846 | -6.123116 |
| N | 1.826560  | -1.413179 | -5.607911 |
| H | -0.098271 | -1.864086 | -6.167642 |
| N | 0.725249  | 2.356022  | -7.015357 |
| H | 1.252439  | 3.157807  | -6.694322 |
| H | -0.272793 | 2.495780  | -7.099625 |
| C | 2.678672  | -0.377473 | -5.607127 |
| C | 6.852736  | -2.156743 | -3.835937 |
| O | 6.617578  | -3.523710 | -3.540632 |
| C | 7.371083  | -4.404550 | -4.355002 |
| H | 7.132755  | -5.419813 | -4.036238 |
| H | 8.446300  | -4.226485 | -4.228017 |
| H | 7.120877  | -4.297851 | -5.416768 |
| H | 7.930606  | -1.971061 | -3.930214 |
| O | 8.191099  | 2.672722  | -4.755656 |
| H | 7.375219  | 4.888324  | -2.738889 |
| O | 4.738708  | 8.818317  | -2.611851 |
| H | 2.339273  | 8.563624  | -1.633600 |
| C | -1.585234 | 8.252292  | -1.635430 |
| H | -2.308226 | 8.052324  | -0.834809 |
| H | -1.564293 | 9.331910  | -1.829576 |
| H | -1.892620 | 7.726723  | -2.540230 |

**Table 16S. M06-2X/6-31G(d,p) optimized reference geometry for trioxethymidine diphosphate d(T)<sub>3</sub> in Model 4.**

|   |            |           |           |
|---|------------|-----------|-----------|
| O | -8.181508  | -2.380579 | -6.157725 |
| C | -9.230993  | -1.430080 | -6.163710 |
| H | -9.106504  | -0.801840 | -5.280719 |
| H | -10.208644 | -1.926166 | -6.123002 |
| H | -9.188624  | -0.805349 | -7.064574 |
| C | -8.246455  | -3.253881 | -7.266766 |
| C | -7.030550  | -4.158388 | -7.272988 |
| C | -6.727379  | -4.790160 | -5.910725 |
| C | -5.659220  | -3.868777 | -5.338359 |
| H | -5.002011  | -4.361623 | -4.623735 |
| H | -6.150594  | -3.027023 | -4.846239 |
| C | -4.909505  | -3.398881 | -6.581885 |
| N | -4.376230  | -2.040420 | -6.472282 |
| C | -3.025423  | -1.818965 | -6.637832 |
| N | -2.651239  | -0.499200 | -6.529538 |
| C | -3.455515  | 0.589478  | -6.226045 |
| C | -4.872853  | 0.284578  | -6.104852 |
| C | -5.817811  | 1.413673  | -5.831234 |
| H | -5.571493  | 1.899197  | -4.882025 |
| H | -6.846445  | 1.052425  | -5.781430 |
| H | -5.749969  | 2.175569  | -6.613188 |
| O | -2.962063  | 1.706110  | -6.096516 |
| H | -1.655201  | -0.325481 | -6.615681 |
| O | -2.204873  | -2.703293 | -6.859326 |
| C | -5.256994  | -1.000050 | -6.245553 |
| H | -6.300797  | -1.300218 | -6.196882 |
| H | -4.058814  | -4.042600 | -6.813508 |
| H | -7.614366  | -4.852405 | -5.276972 |
| O | -6.237711  | -6.118502 | -6.164141 |
| P | -5.728016  | -7.042814 | -4.927777 |
| O | -6.284587  | -6.565576 | -3.612299 |
| O | -4.127739  | -6.756069 | -4.901182 |
| C | -3.371512  | -7.180285 | -6.044129 |

|    |           |            |           |
|----|-----------|------------|-----------|
| C  | -1.910673 | -6.901997  | -5.783559 |
| C  | -1.391953 | -7.502743  | -4.464090 |
| C  | -1.210466 | -6.289979  | -3.561160 |
| H  | -0.402278 | -6.419563  | -2.844617 |
| H  | -2.139892 | -6.103646  | -3.018812 |
| C  | -0.912525 | -5.184239  | -4.566238 |
| N  | -1.233629 | -3.831131  | -4.135661 |
| C  | -2.494526 | -3.555384  | -3.641812 |
| C  | -2.939656 | -2.312445  | -3.367590 |
| C  | -4.280515 | -2.007775  | -2.776277 |
| H  | -4.159733 | -1.461626  | -1.836172 |
| H  | -4.835272 | -2.926476  | -2.577535 |
| H  | -4.868985 | -1.377633  | -3.451983 |
| C  | -2.041327 | -1.196853  | -3.627462 |
| O  | -2.302929 | -0.018194  | -3.398564 |
| N  | -0.817586 | -1.547492  | -4.174616 |
| H  | -0.160914 | -0.794991  | -4.353382 |
| H  | -3.118352 | -4.426395  | -3.474691 |
| C  | -0.353341 | -2.810913  | -4.457388 |
| O  | 0.756791  | -2.991868  | -4.940808 |
| H  | 0.143731  | -5.177031  | -4.839100 |
| H  | -2.087039 | -8.233744  | -4.407298 |
| O  | -0.145230 | -8.160958  | -4.748391 |
| P  | 0.619160  | -8.948553  | -3.545889 |
| O  | -0.346622 | -9.357255  | -2.464158 |
| O  | 1.586771  | -7.808870  | -2.909785 |
| C  | 2.669830  | -7.336528  | -3.721228 |
| C  | 3.201175  | -6.050329  | -3.139595 |
| C  | 3.627135  | -6.099117  | -1.673862 |
| C  | 3.492341  | -4.630011  | -1.250006 |
| H  | 4.455799  | -4.135941  | -1.401083 |
| H  | 3.183764  | -4.494847  | -0.212880 |
| C  | 2.454652  | -4.048389  | -2.228505 |
| N  | 1.177048  | -3.688306  | -1.609915 |
| C  | 0.368974  | -4.681720  | -1.099579 |
| C  | -0.863524 | -4.462459  | -0.598289 |
| C  | -1.761308 | -5.546879  | -0.088136 |
| H  | -1.968822 | -5.416584  | 0.978206  |
| H  | -1.307865 | -6.528281  | -0.241931 |
| H  | -2.722436 | -5.520448  | -0.612245 |
| C  | -1.352270 | -3.093062  | -0.569635 |
| O  | -2.448697 | -2.747383  | -0.136403 |
| N  | -0.470063 | -2.150995  | -1.076956 |
| H  | -0.779340 | -1.184033  | -1.077872 |
| H  | 0.788874  | -5.681171  | -1.150055 |
| C  | 0.778628  | -2.367549  | -1.613604 |
| O  | 1.460377  | -1.449211  | -2.053605 |
| H  | 2.809722  | -3.142308  | -2.718015 |
| H  | 2.944137  | -6.740542  | -1.099004 |
| O  | 4.935556  | -6.613205  | -1.604962 |
| C  | 5.367939  | -6.818221  | -0.270732 |
| H  | 5.424012  | -5.871149  | 0.279019  |
| H  | 4.688388  | -7.495999  | 0.260995  |
| H  | 6.361391  | -7.265155  | -0.318121 |
| O  | 2.183281  | -5.056703  | -3.191525 |
| H  | 4.070638  | -5.741068  | -3.737656 |
| H  | 3.470844  | -8.081479  | -3.739589 |
| H  | 2.320584  | -7.157730  | -4.744068 |
| O  | 1.437051  | -10.041586 | -4.184857 |
| Na | 0.331134  | -11.630636 | -2.795652 |
| O  | -1.722570 | -5.487204  | -5.696369 |
| H  | -1.324668 | -7.305503  | -6.616824 |
| H  | -3.516795 | -8.251745  | -6.210675 |
| H  | -3.704666 | -6.626202  | -6.928450 |
| O  | -6.000103 | -8.477779  | -5.302845 |
| Na | -7.173284 | -8.773254  | -3.260090 |
| O  | -5.856827 | -3.416639  | -7.638227 |
| H  | -7.188042 | -4.942788  | -8.018927 |
| H  | -9.155058 | -3.870502  | -7.213343 |
| H  | -8.272818 | -2.682210  | -8.205207 |



**Table 17S. M06-2X/6-31G(d,p) optimized reference geometry for trideoxyguanosine diphosphate d(G)<sub>3</sub> in Model 1.**

|   |           |           |           |
|---|-----------|-----------|-----------|
| O | -7.894865 | -0.175015 | -0.496409 |
| C | -7.451149 | -1.254807 | -1.293262 |
| C | -5.960154 | -1.523450 | -1.182129 |
| C | -5.437886 | -1.701772 | 0.260268  |
| C | -4.851336 | -0.321301 | 0.550933  |
| H | -4.160524 | -0.330105 | 1.390548  |
| H | -5.665915 | 0.387804  | 0.737030  |
| C | -4.218873 | -0.045427 | -0.798053 |
| H | -3.316699 | -0.654173 | -0.925668 |
| N | -3.813516 | 1.312213  | -1.076350 |
| C | -2.598725 | 1.636380  | -1.605078 |
| N | -1.619293 | 0.745639  | -1.858919 |
| C | -0.494894 | 1.315828  | -2.198267 |
| N | 0.631906  | 0.558864  | -2.380534 |
| H | 0.479586  | -0.344931 | -1.927318 |
| H | 1.477886  | 0.981895  | -2.001740 |
| N | -0.381236 | 2.671214  | -2.399717 |
| H | 0.544054  | 3.056699  | -2.557677 |
| C | -1.352680 | 3.652451  | -2.089164 |
| O | -1.031734 | 4.838174  | -2.140467 |
| C | -2.580097 | 3.026135  | -1.693574 |
| N | -3.765824 | 3.555222  | -1.222247 |
| C | -4.460463 | 2.512961  | -0.859927 |
| H | -5.446207 | 2.542957  | -0.417478 |
| O | -4.451068 | -2.708647 | 0.171606  |
| P | -3.559912 | -3.183854 | 1.505641  |
| O | -3.900187 | -2.284316 | 2.647622  |
| O | -2.068495 | -2.672733 | 0.991048  |
| C | -1.447923 | -3.341901 | -0.086159 |
| C | -0.001285 | -2.887422 | -0.215877 |
| C | 0.930413  | -3.195520 | 0.961195  |
| C | 0.624480  | -2.046648 | 1.915699  |
| H | 1.435886  | -1.886444 | 2.627776  |
| H | -0.327591 | -2.206311 | 2.421836  |
| C | 0.527036  | -0.896009 | 0.914306  |
| H | 1.509224  | -0.443838 | 0.729525  |
| N | -0.334909 | 0.199677  | 1.328052  |
| C | -1.594051 | 0.171891  | 1.903830  |
| H | -2.064558 | -0.755750 | 2.215922  |
| N | -2.129415 | 1.362851  | 2.008405  |
| C | -1.196310 | 2.215936  | 1.465760  |
| C | -1.247401 | 3.636411  | 1.239698  |
| N | -0.067480 | 4.063047  | 0.525100  |
| C | 0.934504  | 3.234080  | 0.094342  |
| N | 1.019135  | 1.971274  | 0.382021  |
| N | 1.888943  | 3.774947  | -0.757833 |
| H | 2.777990  | 3.291035  | -0.651414 |
| H | 1.947450  | 4.782914  | -0.779515 |
| H | -0.228343 | 4.928239  | 0.014307  |
| O | -2.078361 | 4.466814  | 1.536701  |
| C | -0.086256 | 1.507104  | 1.033027  |
| H | 0.771733  | -4.194544 | 1.378531  |
| O | 2.283250  | -2.980764 | 0.588311  |
| P | 3.181479  | -3.976235 | -0.379458 |
| O | 4.344797  | -4.480482 | 0.396979  |
| O | 3.838360  | -2.742367 | -1.302720 |
| C | 2.981574  | -2.058174 | -2.180911 |
| H | 2.004366  | -1.871112 | -1.716203 |
| C | 3.610554  | -0.716050 | -2.518125 |
| O | 3.426241  | 0.221367  | -1.446264 |
| C | 4.618295  | 0.402435  | -0.708249 |
| N | 4.374396  | 0.201352  | 0.706333  |
| C | 4.254497  | -0.987515 | 1.416863  |
| N | 3.827169  | -0.801291 | 2.635564  |
| C | 3.617024  | 0.553101  | 2.733362  |
| C | 3.104685  | 1.331142  | 3.830801  |
| O | 2.795257  | 1.022160  | 4.961786  |
| N | 2.984067  | 2.694594  | 3.422814  |

|   |           |           |           |
|---|-----------|-----------|-----------|
| H | 2.642086  | 3.311410  | 4.148063  |
| C | 3.353936  | 3.217351  | 2.219534  |
| N | 3.176135  | 4.592319  | 2.093440  |
| H | 2.249929  | 4.893681  | 2.379818  |
| H | 3.355895  | 4.869550  | 1.137487  |
| N | 3.875981  | 2.523856  | 1.250065  |
| H | 4.475854  | -1.953960 | 0.978700  |
| C | 3.949535  | 1.192408  | 1.550668  |
| C | 5.663635  | -0.547074 | -1.303576 |
| H | 5.690955  | -1.492048 | -0.760824 |
| H | 6.656860  | -0.091159 | -1.302875 |
| H | 4.923492  | 1.450492  | -0.801790 |
| C | 5.125251  | -0.795021 | -2.714081 |
| H | 5.430430  | -1.773663 | -3.107939 |
| O | 5.498925  | 0.242053  | -3.611856 |
| C | 6.808964  | 0.103542  | -4.088849 |
| H | 7.558946  | 0.163679  | -3.286597 |
| H | 6.946900  | -0.856431 | -4.608922 |
| H | 6.988771  | 0.917968  | -4.794401 |
| H | 3.132817  | -0.287203 | -3.405610 |
| H | 2.824507  | -2.639138 | -3.100762 |
| O | 2.262294  | -4.790724 | -1.225594 |
| O | 0.057637  | -1.450995 | -0.310071 |
| H | 0.424263  | -3.316721 | -1.128169 |
| H | -1.490578 | -4.428657 | 0.059049  |
| H | -1.972963 | -3.095241 | -1.019951 |
| O | -3.582188 | -4.669628 | 1.534966  |
| H | -6.227179 | -1.976561 | 0.969192  |
| H | -5.223179 | -0.430541 | -1.742295 |
| H | -5.731510 | -2.442349 | -1.737885 |
| H | -7.986495 | -2.147806 | -0.948856 |
| H | -7.716064 | -1.084110 | -2.348780 |
| C | -7.871933 | 1.059237  | -1.176681 |
| H | -6.904550 | 1.240163  | -1.654906 |
| H | -8.069879 | 1.839965  | -0.437078 |
| H | -8.658036 | 1.098046  | -1.948200 |

**Table 18S. M06-2X/6-31G(d,p) optimized reference geometry for trideoxycytidine diphosphate d(C)<sub>3</sub> in Model 1.**

|   |           |           |           |
|---|-----------|-----------|-----------|
| O | -7.323244 | -2.582948 | -0.199419 |
| C | -8.150875 | -1.501097 | -0.559271 |
| H | -8.668162 | -1.700188 | -1.510777 |
| H | -8.899794 | -1.398302 | 0.230699  |
| H | -7.590363 | -0.566779 | -0.665178 |
| C | -6.361984 | -2.926771 | -1.179549 |
| H | -6.777090 | -2.779371 | -2.188484 |
| H | -6.144231 | -3.992013 | -1.044433 |
| C | -5.067512 | -2.147846 | -1.404243 |
| O | -5.333624 | -0.772912 | -1.344070 |
| C | -4.639204 | 0.000570  | -0.381799 |
| N | -5.180249 | 1.362439  | -0.379203 |
| C | -4.923912 | 2.160184  | -1.547610 |
| N | -5.380251 | 3.464588  | -1.526099 |
| C | -5.959157 | 3.946431  | -0.458775 |
| N | -6.412915 | 5.242239  | -0.520721 |
| H | -6.037855 | 5.761971  | -1.301323 |
| H | -6.483390 | 5.746921  | 0.348663  |
| C | -6.163175 | 3.199227  | 0.745632  |
| H | -6.627557 | 3.625861  | 1.623899  |
| O | -4.320512 | 1.671505  | -2.472134 |
| C | -5.754157 | 1.902556  | 0.717006  |
| H | -5.854859 | 1.251497  | 1.576544  |
| H | -3.581814 | 0.077854  | -0.656439 |
| C | -4.820732 | -0.784585 | 0.907361  |
| H | -5.876191 | -0.770629 | 1.205702  |
| H | -4.156384 | -0.514544 | 1.731320  |
| H | -4.315406 | -2.546018 | -1.734040 |
| C | -4.480243 | -2.183378 | 0.388854  |
| H | -4.923632 | -2.979544 | 0.998716  |
| O | -3.082921 | -2.340374 | 0.310850  |
| P | -2.355469 | -2.712363 | 1.783049  |

|   |           |           |           |
|---|-----------|-----------|-----------|
| O | -2.893953 | -4.030295 | 2.219560  |
| O | -0.825090 | -2.813127 | 1.206357  |
| C | -0.507719 | -3.672081 | 0.127278  |
| H | -1.394222 | -3.840648 | -0.493835 |
| C | 0.572223  | -3.030166 | -0.733312 |
| H | 0.787920  | -3.701323 | -1.574549 |
| O | 0.090283  | -1.787509 | -1.245558 |
| C | 0.902082  | -0.719466 | -0.773303 |
| H | 1.594419  | -0.385695 | -1.547115 |
| N | 0.028092  | 0.421128  | -0.491504 |
| C | 0.164571  | 1.616505  | -1.250324 |
| O | 1.087508  | 1.737431  | -2.041301 |
| N | -0.766423 | 2.603373  | -1.030101 |
| C | -1.664293 | 2.467367  | -0.082823 |
| N | -2.557397 | 3.500820  | 0.080028  |
| H | -2.663079 | 4.072955  | -0.746919 |
| H | -3.417706 | 3.283664  | 0.562198  |
| C | -1.739240 | 1.335088  | 0.783689  |
| H | -2.467236 | 1.225657  | 1.578548  |
| C | -0.891495 | 0.310197  | 0.491320  |
| H | -0.928536 | -0.625441 | 1.039148  |
| C | 1.651182  | -1.267972 | 0.435951  |
| H | 2.568952  | -0.727518 | 0.658149  |
| H | 1.008730  | -1.291399 | 1.319001  |
| C | 1.898223  | -2.696840 | -0.032777 |
| O | 2.890165  | -2.758542 | -1.052146 |
| P | 4.399828  | -2.162643 | -0.743091 |
| O | 5.296959  | -2.645368 | -1.834283 |
| O | 4.115196  | -0.529651 | -0.999720 |
| C | 4.567398  | 0.093376  | -2.182042 |
| H | 4.842077  | -0.657905 | -2.931085 |
| H | 3.757952  | 0.726752  | -2.569077 |
| C | 5.782344  | 0.957857  | -1.877127 |
| H | 6.213192  | 1.341791  | -2.808580 |
| O | 5.433752  | 2.100128  | -1.081395 |
| C | 5.718036  | 1.872509  | 0.271310  |
| H | 6.316845  | 2.704311  | 0.655734  |
| C | 6.463849  | 0.533541  | 0.382119  |
| H | 7.333965  | 0.632665  | 1.032657  |
| H | 5.810663  | -0.244929 | 0.785301  |
| N | 4.462430  | 1.890415  | 1.058554  |
| C | 4.626722  | 1.850945  | 2.465254  |
| O | 5.766589  | 1.859880  | 2.914901  |
| N | 3.495544  | 1.792472  | 3.234491  |
| C | 2.318795  | 1.905345  | 2.657761  |
| C | 2.133818  | 2.122064  | 1.262424  |
| H | 1.153975  | 2.300013  | 0.844845  |
| N | 1.206975  | 1.833739  | 3.461140  |
| H | 1.390639  | 1.409721  | 4.359095  |
| H | 0.355101  | 1.527079  | 3.009737  |
| C | 3.249153  | 2.054578  | 0.486776  |
| H | 3.221207  | 2.130257  | -0.594439 |
| C | 6.846220  | 0.219455  | -1.067773 |
| O | 8.111550  | 0.782156  | -1.419526 |
| C | 9.180200  | 0.006760  | -0.952842 |
| H | 10.105564 | 0.493417  | -1.274785 |
| H | 9.147447  | -1.012536 | -1.365996 |
| H | 9.191819  | -0.075329 | 0.143518  |
| H | 6.834293  | -0.856814 | -1.289551 |
| O | 4.680948  | -2.292765 | 0.716066  |
| H | 2.149069  | -3.376152 | 0.788350  |
| H | -0.155602 | -4.639560 | 0.509115  |
| O | -2.376540 | -1.476266 | 2.630722  |



**Table 19S. M06-2X/6-31G(d,p) optimized reference geometry for trideoxyguanosine diphosphate d(G)<sub>3</sub> in Model 2.**

|    |           |           |           |
|----|-----------|-----------|-----------|
| O  | 6.647381  | -1.180255 | -0.861175 |
| C  | 7.733873  | -2.073906 | -0.830506 |
| H  | 7.396148  | -2.981818 | -0.329170 |
| H  | 8.583645  | -1.650416 | -0.275898 |
| H  | 8.070388  | -2.325163 | -1.846065 |
| C  | 6.968828  | 0.034028  | -1.493679 |
| C  | 5.731783  | 0.908895  | -1.579403 |
| C  | 5.001834  | 1.126968  | -0.245090 |
| H  | 5.676067  | 1.118594  | 0.617348  |
| C  | 3.978618  | 0.004341  | -0.252135 |
| H  | 3.142726  | 0.193866  | 0.418683  |
| H  | 4.471957  | -0.939099 | -0.006829 |
| C  | 3.584691  | 0.014606  | -1.726138 |
| H  | 2.823171  | 0.774597  | -1.918371 |
| N  | 3.027257  | -1.221631 | -2.218445 |
| C  | 3.660924  | -2.433677 | -2.398343 |
| H  | 4.720972  | -2.527389 | -2.202891 |
| N  | 2.858395  | -3.372482 | -2.820195 |
| C  | 1.628535  | -2.756515 | -2.912950 |
| C  | 0.341749  | -3.271255 | -3.303490 |
| N  | -0.650412 | -2.252473 | -3.134446 |
| C  | -0.434370 | -0.957180 | -2.731088 |
| N  | 0.743556  | -0.477770 | -2.467778 |
| N  | -1.552760 | -0.159706 | -2.637257 |
| H  | -1.336033 | 0.704605  | -2.148896 |
| H  | -2.350680 | -0.608274 | -2.193954 |
| H  | -1.566572 | -2.507453 | -3.482509 |
| O  | -0.004106 | -4.363463 | -3.704895 |
| C  | 1.718524  | -1.419605 | -2.548471 |
| O  | 4.359964  | 2.406237  | -0.374184 |
| P  | 3.638356  | 3.152939  | 0.867702  |
| O  | 3.181160  | 2.152705  | 1.913754  |
| Na | 4.333585  | 3.238757  | 3.434452  |
| O  | 4.516023  | 4.226032  | 1.471517  |
| O  | 2.403836  | 3.872842  | 0.106451  |
| C  | 1.854556  | 3.428206  | -1.128171 |
| C  | 0.725838  | 2.434050  | -0.930713 |
| C  | -0.443006 | 2.958004  | -0.060903 |
| C  | -0.277234 | 2.165302  | 1.233420  |
| H  | -1.188615 | 2.097258  | 1.825507  |
| H  | 0.545404  | 2.603789  | 1.809431  |
| C  | 0.209733  | 0.850840  | 0.637091  |
| N  | 0.736492  | -0.137772 | 1.529456  |
| C  | 1.442739  | 0.019405  | 2.711414  |
| H  | 1.657553  | 1.003635  | 3.090841  |
| N  | 1.817917  | -1.107212 | 3.239997  |
| C  | 1.341429  | -2.068956 | 2.374497  |
| C  | 1.309270  | -3.499146 | 2.503973  |
| O  | 1.674591  | -4.232502 | 3.405451  |
| N  | 0.677504  | -4.070076 | 1.366064  |
| H  | 0.676585  | -5.081741 | 1.356553  |
| C  | 0.024376  | -3.392584 | 0.371271  |
| N  | -0.020468 | -2.086525 | 0.299163  |
| N  | -0.574308 | -4.161432 | -0.578753 |
| H  | -0.938051 | -5.054628 | -0.284154 |
| H  | -1.153350 | -3.643177 | -1.222407 |
| C  | 0.666416  | -1.490046 | 1.308478  |
| H  | -0.591298 | 0.349523  | 0.073880  |
| H  | -0.413856 | 4.037706  | 0.066231  |
| O  | -1.669428 | 2.562707  | -0.721612 |
| P  | -3.004116 | 3.433779  | -0.416400 |
| O  | -3.142546 | 3.738167  | 1.057918  |
| Na | -3.331941 | 5.877704  | 0.552230  |
| O  | -4.146445 | 2.355545  | -0.802579 |
| C  | -4.233867 | 1.842273  | -2.128894 |
| C  | -4.864260 | 0.462402  | -2.056284 |
| C  | -6.257259 | 0.416262  | -1.417253 |
| C  | -5.949045 | 0.108991  | 0.046154  |

|   |           |           |           |
|---|-----------|-----------|-----------|
| H | -6.764214 | -0.405960 | 0.557306  |
| H | -5.724234 | 1.034528  | 0.577791  |
| C | -4.698718 | -0.770361 | -0.048403 |
| N | -3.806397 | -0.619496 | 1.075921  |
| C | -3.442503 | 0.547179  | 1.730245  |
| N | -2.612611 | 0.338856  | 2.713832  |
| C | -2.406237 | -1.019230 | 2.714557  |
| C | -1.603473 | -1.823523 | 3.601868  |
| O | -0.938494 | -1.511449 | 4.560598  |
| N | -1.680330 | -3.195365 | 3.195523  |
| H | -1.034776 | -3.802371 | 3.693887  |
| C | -2.432375 | -3.684643 | 2.166669  |
| N | -2.328273 | -5.045626 | 1.922671  |
| H | -2.192968 | -5.619874 | 2.744749  |
| H | -3.097291 | -5.366607 | 1.348233  |
| N | -3.194370 | -2.958064 | 1.395662  |
| C | -3.808385 | 1.520280  | 1.433106  |
| H | -3.124544 | -1.633510 | 1.704761  |
| H | -4.941795 | -1.835725 | -0.099841 |
| H | -6.799816 | 1.364833  | -1.544793 |
| O | -6.952791 | -0.640820 | -2.044152 |
| C | -8.330196 | -0.658545 | -1.753649 |
| H | -8.530449 | -0.810645 | -0.684699 |
| H | -8.812849 | 0.277882  | -2.067271 |
| H | -8.765057 | -1.488437 | -2.311820 |
| O | -4.049465 | -0.602294 | -1.259104 |
| H | -4.927885 | 0.048116  | -3.068867 |
| H | -3.239974 | 1.761185  | -2.580133 |
| H | -4.844097 | 2.511275  | -2.746103 |
| O | -3.068674 | 4.665006  | -1.291720 |
| O | 1.224708  | 1.290519  | -0.261873 |
| H | 0.342954  | 2.150604  | -1.922824 |
| H | 1.464208  | 4.316868  | -1.634774 |
| H | 2.636248  | 2.987581  | -1.751835 |
| O | 4.778934  | 0.296447  | -2.442999 |
| H | 6.020532  | 1.881921  | -1.994177 |
| H | 7.760546  | 0.563577  | -0.937244 |
| H | 7.336149  | -0.150481 | -2.515143 |

**Table 20S. M06-2X/6-31G(d,p) optimized reference geometry for trideoxycytidine diphosphate d(C)<sub>3</sub> in Model 2.**

|    |          |           |           |
|----|----------|-----------|-----------|
| O  | 3.327917 | -1.379700 | 1.062081  |
| C  | 3.761543 | -0.498575 | 2.068508  |
| C  | 4.098380 | 0.837227  | 1.428910  |
| O  | 5.285330 | 0.730939  | 0.644637  |
| C  | 4.985631 | 0.697546  | -0.731903 |
| H  | 5.510775 | 1.509255  | -1.239519 |
| N  | 5.504483 | -0.552757 | -1.319272 |
| C  | 5.515749 | -0.595368 | -2.741127 |
| N  | 5.951064 | -1.750507 | -3.330162 |
| C  | 6.311948 | -2.770206 | -2.585957 |
| N  | 6.759900 | -3.883204 | -3.238705 |
| H  | 6.571701 | -3.897582 | -4.229765 |
| H  | 6.743146 | -4.766302 | -2.756311 |
| C  | 6.301299 | -2.759751 | -1.154714 |
| H  | 6.626469 | -3.607472 | -0.567161 |
| O  | 5.133215 | 0.393280  | -3.344661 |
| C  | 5.882978 | -1.606914 | -0.570269 |
| H  | 5.845344 | -1.456563 | 0.501203  |
| C  | 3.461763 | 0.811974  | -0.880227 |
| H  | 3.179856 | 1.481358  | -1.690596 |
| H  | 3.017896 | -0.168279 | -1.067114 |
| H  | 4.284115 | 1.578695  | 2.214470  |
| C  | 3.004548 | 1.321019  | 0.476962  |
| O  | 2.977791 | 2.760467  | 0.460802  |
| P  | 1.870238 | 3.563291  | 1.307142  |
| O  | 2.497304 | 4.735396  | 2.025445  |
| Na | 1.714265 | 3.995564  | 3.914626  |
| O  | 0.838200 | 4.122517  | 0.191696  |
| C  | 0.905097 | 3.835741  | -1.200011 |
| H  | 1.928857 | 3.592859  | -1.496156 |

|    |           |           |           |
|----|-----------|-----------|-----------|
| H  | 0.583542  | 4.740223  | -1.725166 |
| C  | -0.014507 | 2.683627  | -1.546899 |
| H  | -0.082001 | 2.580594  | -2.638034 |
| O  | 0.524845  | 1.499139  | -0.970601 |
| C  | -0.560147 | 0.745821  | -0.441336 |
| H  | -1.069829 | 0.220542  | -1.255034 |
| N  | -0.102680 | -0.294433 | 0.454079  |
| C  | 0.288978  | -1.534658 | -0.153023 |
| O  | 0.511525  | -1.557211 | -1.344136 |
| N  | 0.312901  | -2.639373 | 0.665245  |
| C  | 0.228762  | -2.494559 | 1.965767  |
| N  | 0.252052  | -3.622302 | 2.742947  |
| H  | 0.009995  | -4.451462 | 2.212347  |
| H  | -0.298327 | -3.548498 | 3.591487  |
| C  | 0.133410  | -1.217031 | 2.612717  |
| H  | 0.126535  | -1.122374 | 3.690707  |
| C  | -0.800167 | -0.148681 | 1.806973  |
| H  | -0.212597 | 0.855910  | 2.189400  |
| C  | -1.443905 | 1.828451  | 0.165952  |
| H  | -0.927807 | 2.294321  | 1.011577  |
| H  | -2.441947 | 1.507421  | 0.459350  |
| C  | -1.444324 | 2.836779  | -0.974081 |
| H  | -1.659386 | 3.853774  | -0.636753 |
| O  | -2.354408 | 2.493767  | -2.031716 |
| P  | -3.922804 | 2.235113  | -1.730262 |
| O  | -4.718276 | 2.589973  | -2.962502 |
| Na | -5.925459 | 3.942690  | -1.709775 |
| O  | -3.974678 | 0.629389  | -1.462238 |
| C  | -3.636980 | -0.205909 | -2.573726 |
| H  | -2.688943 | 0.128924  | -3.010945 |
| C  | -3.498800 | -1.632163 | -2.100617 |
| H  | -3.187161 | -2.242593 | -2.961503 |
| O  | -2.525331 | -1.698971 | -1.066878 |
| C  | -2.802563 | -2.770319 | -0.194335 |
| H  | -1.955271 | -3.456571 | -0.149444 |
| C  | -4.102244 | -3.417184 | -0.687763 |
| H  | -3.874826 | -4.240743 | -1.372377 |
| H  | -4.694817 | -3.802272 | 0.143054  |
| N  | -2.944042 | -2.221417 | 1.171150  |
| C  | -2.711750 | -3.124750 | 2.236659  |
| O  | -2.523121 | -4.302212 | 1.971124  |
| N  | -2.684046 | -2.607108 | 3.504983  |
| C  | -3.008829 | -1.346700 | 3.008455  |
| C  | -3.394196 | -0.451943 | 2.655317  |
| H  | -3.675017 | 0.576243  | 2.841773  |
| N  | -2.912943 | -0.878202 | 4.980064  |
| H  | -2.845261 | -1.589530 | 5.692602  |
| H  | -3.413629 | -0.038993 | 5.222809  |
| C  | -3.316568 | -0.941981 | 1.389305  |
| H  | -3.524507 | -0.350084 | 0.502351  |
| C  | -4.740667 | -2.282191 | -1.498409 |
| O  | -5.586771 | -2.684219 | -2.540754 |
| C  | -6.798732 | -3.238240 | -2.086257 |
| H  | -7.402086 | -3.461694 | -2.966945 |
| H  | -6.634660 | -4.166249 | -1.522443 |
| H  | -7.344659 | -2.531196 | -1.445171 |
| H  | -5.255554 | -1.563235 | -0.838265 |
| H  | -4.422321 | -0.149997 | -3.334973 |
| O  | -4.379766 | 2.931088  | -0.467907 |
| O  | 1.133302  | 2.633030  | 2.268125  |
| H  | 2.028895  | 0.938910  | 0.762280  |
| H  | 4.664582  | -0.889145 | 2.566971  |
| H  | 2.973995  | -0.365040 | 2.828538  |
| C  | 3.373517  | -2.734437 | 1.454844  |
| H  | 4.414705  | -3.058517 | 1.608532  |
| H  | 2.914873  | -3.315199 | 0.654052  |
| H  | 2.808192  | -2.904329 | 2.380880  |

**Table 21S. M06-2X/6-31G(d,p) optimized reference geometry for trideoxyguanosine diphosphate d(G)<sub>3</sub> in Model 3.**

|   |           |           |            |
|---|-----------|-----------|------------|
| O | -6.783944 | 2.677053  | -9.534764  |
| C | -6.860626 | 4.088015  | -9.453973  |
| H | -6.304902 | 4.395026  | -8.567416  |
| H | -7.902829 | 4.419357  | -9.364442  |
| H | -6.417534 | 4.557065  | -10.341625 |
| C | -7.454389 | 2.177295  | -10.673003 |
| C | -7.328924 | 0.668016  | -10.725218 |
| C | -7.748216 | -0.049193 | -9.439757  |
| C | -6.432230 | -0.179374 | -8.685269  |
| H | -6.426020 | -1.002070 | -7.971348  |
| H | -6.204816 | 0.758925  | -8.175459  |
| C | -5.450470 | -0.418900 | -9.825236  |
| N | -4.097618 | 0.238400  | -9.576924  |
| C | -3.695773 | 1.339054  | -9.350979  |
| H | -4.426403 | 2.119037  | -9.178037  |
| N | -2.397777 | 1.489800  | -9.404154  |
| C | -1.917813 | 0.225776  | -9.696050  |
| C | -0.582399 | -0.238061 | -9.901234  |
| O | 0.475809  | 0.387542  | -9.822820  |
| N | -0.571243 | -1.601588 | -10.228286 |
| C | -1.664193 | -2.424283 | -10.291211 |
| N | -2.896704 | -2.002371 | -10.099176 |
| N | -1.439990 | -3.718085 | -10.627988 |
| H | -2.213099 | -4.343573 | -10.448557 |
| H | -0.522915 | -4.108951 | -10.463401 |
| H | 0.350339  | -2.002042 | -10.365303 |
| C | -2.958983 | -0.681934 | -9.819045  |
| H | -5.361400 | -1.482880 | -10.064959 |
| H | -8.518172 | 0.492903  | -8.886492  |
| O | -8.245761 | -1.335568 | -9.832910  |
| P | -9.009499 | -2.281791 | -8.736393  |
| O | -9.737095 | -1.430329 | -7.740617  |
| O | -7.761295 | -2.947505 | -7.913877  |
| C | -6.908080 | -3.864443 | -8.597417  |
| C | -5.697879 | -4.152351 | -7.734842  |
| C | -6.050948 | -4.409588 | -6.255635  |
| C | -5.699971 | -3.086369 | -5.593841  |
| H | -5.533797 | -3.174818 | -4.522551  |
| H | -6.483693 | -2.355512 | -5.804521  |
| C | -4.444521 | -2.745802 | -6.379874  |
| H | -3.605418 | -3.388389 | -6.081182  |
| N | -3.966293 | -1.389595 | -6.281877  |
| C | -4.645008 | -0.236877 | -5.947107  |
| H | -5.695206 | -0.252020 | -5.694628  |
| N | -3.885832 | 0.827335  | -5.962363  |
| C | -2.638215 | 0.353707  | -6.319061  |
| C | -1.390865 | 1.039335  | -6.461536  |
| O | -1.149108 | 2.236571  | -6.318972  |
| N | -0.364401 | 0.143755  | -6.796644  |
| C | -0.502010 | -1.209153 | -6.976972  |
| N | -1.650575 | -1.843061 | -6.851244  |
| N | 0.607406  | -1.893455 | -7.344934  |
| H | 0.547047  | -2.896751 | -7.238223  |
| H | 1.513505  | -1.487503 | -7.159958  |
| H | 0.546071  | 0.565451  | -6.948663  |
| C | -2.668370 | -1.015086 | -6.521188  |
| O | -5.177534 | -5.399670 | -5.702342  |
| P | -5.662399 | -6.966067 | -5.758107  |
| O | -6.480723 | -7.290170 | -4.543797  |
| O | -4.204181 | -7.651340 | -5.522100  |
| C | -3.231092 | -7.586628 | -6.567850  |
| C | -1.897567 | -7.167396 | -5.988170  |
| C | -1.497756 | -7.935226 | -4.712331  |
| C | -1.748285 | -6.913385 | -3.602399  |
| H | -1.133633 | -7.072980 | -2.716209  |
| H | -2.804010 | -6.931325 | -3.322283  |
| N | -1.415760 | -5.616909 | -4.325276  |
| N | -1.972780 | -4.414721 | -3.755777  |

|   |           |            |            |
|---|-----------|------------|------------|
| C | -3.268640 | -4.215861  | -3.329211  |
| N | -3.534068 | -2.963903  | -3.065959  |
| C | -2.358950 | -2.297100  | -3.348404  |
| C | -2.057635 | -0.900410  | -3.308464  |
| O | -2.796849 | 0.037531   | -3.013797  |
| N | -0.725252 | -0.668126  | -3.679082  |
| H | -0.436564 | 0.305162   | -3.661537  |
| C | 0.187956  | -1.624977  | -4.042540  |
| N | -0.099069 | -2.908527  | -4.120046  |
| N | 1.453974  | -1.202412  | -4.284722  |
| H | 1.595870  | -0.245332  | -4.578897  |
| H | 2.044420  | -1.882528  | -4.743131  |
| H | -3.966822 | -5.036040  | -3.240018  |
| C | -1.378196 | -3.178101  | -3.773809  |
| H | -0.333677 | -5.459931  | -4.383807  |
| H | -2.092274 | -8.848202  | -4.583118  |
| O | -0.124090 | -8.266357  | -4.830986  |
| C | 0.304325  | -9.205702  | -3.861033  |
| H | 0.225261  | -8.808482  | -2.842659  |
| H | -0.286459 | -10.127992 | -3.924920  |
| O | 1.350104  | -9.431304  | -4.072470  |
| O | -1.964247 | -5.781256  | -5.737576  |
| H | -1.119758 | -7.313303  | -6.746410  |
| H | -3.138531 | -8.575436  | -7.026324  |
| H | -3.533831 | -6.869585  | -7.338091  |
| O | -6.189370 | -7.263379  | -7.133597  |
| H | -7.098730 | -4.692302  | -6.122040  |
| O | -4.806923 | -3.022310  | -7.732341  |
| H | -5.176217 | -5.023273  | -8.145015  |
| H | -7.441664 | -4.803622  | -8.779580  |
| H | -6.586864 | -3.444941  | -9.558155  |
| O | -9.704532 | -3.340147  | -9.538782  |
| O | -5.961440 | 0.291757   | -10.946603 |
| H | -7.930683 | 0.303143   | -11.563581 |
| H | -8.519673 | 2.449211   | -10.641564 |
| H | -7.020840 | 2.605567   | -11.588639 |

**Table 22S. M06-2X/6-31G(d,p) optimized reference geometry for trideoxycytidine diphosphate d(C)<sub>3</sub> in Model 3.**

|   |           |          |           |
|---|-----------|----------|-----------|
| O | 4.505057  | 5.683259 | -1.878107 |
| C | 4.511890  | 6.590782 | -0.793057 |
| H | 4.185530  | 6.100383 | 0.132971  |
| H | 5.514438  | 7.007914 | -0.634319 |
| H | 3.819831  | 7.397876 | -1.036179 |
| C | 5.367405  | 4.587519 | -1.654378 |
| H | 5.039148  | 4.012300 | -0.776459 |
| H | 6.394744  | 4.934835 | -1.470681 |
| C | 5.360853  | 3.698169 | -2.877788 |
| H | 6.116734  | 2.913983 | -2.755061 |
| O | 4.062387  | 3.105440 | -3.021498 |
| C | 3.684952  | 3.208681 | -4.392719 |
| N | 2.254375  | 2.994832 | -4.505585 |
| C | 1.808398  | 1.661092 | -4.366253 |
| N | 0.490950  | 1.391538 | -4.537973 |
| C | -0.364649 | 2.378594 | -4.789106 |
| N | -1.654539 | 2.058946 | -4.948669 |
| H | -1.936559 | 1.091839 | -4.895869 |
| H | -2.346155 | 2.759447 | -5.162242 |
| C | 0.044825  | 3.749025 | -4.892742 |
| H | -0.661969 | 4.542415 | -5.090606 |
| O | 2.636181  | 0.784754 | -4.093977 |
| C | 1.366269  | 3.999263 | -4.750167 |
| H | 1.773636  | 4.997113 | -4.838054 |
| C | 4.241709  | 4.560163 | -4.815007 |
| H | 3.706982  | 5.375874 | -4.323930 |
| H | 4.275054  | 4.710745 | -5.893565 |
| H | 4.161969  | 2.404766 | -4.965512 |
| C | 5.631040  | 4.450835 | -4.196572 |
| H | 6.113754  | 5.416622 | -4.024966 |
| O | 6.453002  | 3.618010 | -5.019191 |
| P | 7.551089  | 4.319777 | -6.013063 |

|   |           |           |            |
|---|-----------|-----------|------------|
| O | 8.504534  | 5.133074  | -5.185911  |
| O | 8.249411  | 2.940341  | -6.536379  |
| C | 8.833386  | 2.068537  | -5.563667  |
| H | 8.585310  | 2.405242  | -4.553251  |
| H | 9.921477  | 2.080854  | -5.676195  |
| C | 8.318027  | 0.651681  | -5.747582  |
| H | 8.735741  | 0.040683  | -4.939835  |
| O | 6.887029  | 0.639113  | -5.653810  |
| C | 6.305796  | 0.134429  | -6.855304  |
| H | 5.980482  | -0.898146 | -6.712721  |
| N | 5.097078  | 0.896132  | -7.151593  |
| C | 3.830187  | 0.299166  | -6.976897  |
| O | 3.749872  | -0.873172 | -6.594949  |
| N | 2.722607  | 1.041789  | -7.240088  |
| C | 2.834184  | 2.291224  | -7.673661  |
| N | 1.699591  | 2.964194  | -7.930743  |
| H | 0.825203  | 2.558654  | -7.626884  |
| H | 1.724901  | 3.959077  | -8.094323  |
| C | 4.103186  | 2.917665  | -7.893274  |
| H | 4.193574  | 3.935668  | -8.246903  |
| C | 5.196665  | 2.180833  | -7.594168  |
| H | 6.195572  | 2.587619  | -7.682593  |
| C | 7.403196  | 0.224390  | -7.910680  |
| H | 7.459562  | 1.223049  | -8.346892  |
| H | 7.284539  | -0.501232 | -8.712187  |
| C | 8.662612  | -0.006759 | -7.090447  |
| O | 8.898116  | -1.391536 | -6.807298  |
| P | 9.147377  | -2.475468 | -8.010733  |
| O | 10.129382 | -3.476132 | -7.478301  |
| O | 7.663774  | -3.173317 | -8.108753  |
| C | 7.229281  | -3.896958 | -6.953758  |
| H | 7.104801  | -3.204134 | -6.113458  |
| H | 7.973575  | -4.652681 | -6.683052  |
| C | 5.912007  | -4.575513 | -7.248100  |
| H | 5.634737  | -5.176476 | -6.375078  |
| O | 4.911796  | -3.577184 | -7.473828  |
| C | 4.245664  | -3.818345 | -8.708089  |
| H | 3.314862  | -4.359803 | -8.541592  |
| N | 3.879109  | -2.530061 | -9.277673  |
| C | 4.869623  | -1.628649 | -9.528388  |
| H | 5.875293  | -1.971338 | -9.305281  |
| C | 4.595882  | -0.392246 | -9.999602  |
| H | 5.378763  | 0.329372  | -10.192530 |
| C | 3.208510  | -0.073217 | -10.172099 |
| N | 2.234460  | -0.933023 | -9.895101  |
| N | 2.860432  | 1.133830  | -10.649772 |
| H | 1.887079  | 1.400539  | -10.610377 |
| H | 3.545717  | 1.873097  | -10.695666 |
| C | 2.525974  | -2.178663 | -9.433661  |
| O | 1.644710  | -3.001738 | -9.162875  |
| C | 5.229203  | -4.628141 | -9.547821  |
| H | 5.961799  | -3.970940 | -10.022784 |
| H | 4.726743  | -5.214030 | -10.318435 |
| C | 5.920528  | -5.483663 | -8.489473  |
| O | 5.167650  | -6.641849 | -8.166253  |
| C | 5.308513  | -7.677664 | -9.121924  |
| H | 4.740262  | -8.533271 | -8.755230  |
| H | 6.362400  | -7.962297 | -9.234060  |
| H | 4.917439  | -7.386259 | -10.103513 |
| H | 6.940056  | -5.778525 | -8.778507  |
| O | 9.371475  | -1.775071 | -9.315951  |
| H | 9.552938  | 0.425756  | -7.554421  |
| O | 6.875207  | 4.930658  | -7.207434  |

**Table 23S. M06-2X/6-31G(d,p) optimized reference geometry for trideoxyguanosine diphosphate d(G)<sub>3</sub> in Model 4.**

|    |            |           |             |
|----|------------|-----------|-------------|
| O  | -7.476082  | 2.573318  | -10.149864  |
| C  | -7.472081  | 3.982839  | -10.284184  |
| H  | -6.998455  | 4.394227  | -9.392055   |
| H  | -8.494204  | 4.372580  | -10.3366991 |
| H  | -6.904789  | 4.288686  | -11.171975  |
| C  | -8.073025  | 1.937400  | -11.261381  |
| H  | -9.138997  | 2.199685  | -11.325404  |
| C  | -7.935040  | 0.434693  | -11.122518  |
| C  | -8.356040  | -0.099614 | -9.750351   |
| C  | -7.037361  | -0.187410 | -8.996189   |
| H  | -7.040205  | -0.959844 | -8.228090   |
| H  | -6.810126  | 0.780748  | -8.545200   |
| C  | -6.030438  | -0.502291 | -10.103010  |
| N  | -4.717154  | 0.074674  | -9.872317   |
| C  | -4.437894  | 1.412385  | -9.697692   |
| H  | -5.232572  | 2.147176  | -9.726023   |
| N  | -3.162043  | 1.652746  | -9.535516   |
| C  | -2.569366  | 0.409164  | -9.613656   |
| C  | -1.199757  | 0.028822  | -9.461478   |
| O  | -0.223360  | 0.742996  | -9.232494   |
| N  | -1.045469  | -1.358094 | -9.593409   |
| H  | -0.094241  | -1.698896 | -9.494518   |
| C  | -2.054125  | -2.261284 | -9.811798   |
| N  | -3.316995  | -1.917152 | -9.941143   |
| N  | -1.689027  | -3.564213 | -9.948042   |
| H  | -0.843084  | -3.864310 | -9.480252   |
| H  | -2.458185  | -4.216883 | -9.873583   |
| C  | -3.516378  | -0.582603 | -9.824590   |
| H  | -5.871210  | -1.578278 | -10.218140  |
| H  | -9.086668  | 0.547304  | -9.260954   |
| O  | -8.936468  | -1.398422 | -9.959818   |
| P  | -9.661695  | -2.177581 | -8.728870   |
| O  | -10.145388 | -1.189642 | -7.696058   |
| Na | -8.854026  | -1.640448 | -5.913577   |
| O  | -8.408273  | -2.923891 | -7.968500   |
| C  | -7.719875  | -3.936418 | -8.710582   |
| C  | -6.403494  | -4.260202 | -8.050543   |
| C  | -6.468911  | -4.722668 | -6.567433   |
| C  | -5.648640  | -3.655244 | -5.847280   |
| H  | -5.141703  | -4.002625 | -4.951209   |
| H  | -6.303830  | -2.823870 | -5.576022   |
| C  | -4.709281  | -3.200967 | -6.952033   |
| H  | -3.918872  | -3.939523 | -7.124407   |
| N  | -4.040846  | -1.945729 | -6.732840   |
| C  | -4.587844  | -0.696728 | -6.535382   |
| H  | -5.657435  | -0.543755 | -6.523663   |
| N  | -3.685096  | 0.235453  | -6.366997   |
| C  | -2.480740  | -0.435463 | -6.452671   |
| C  | -1.139253  | 0.045627  | -6.345811   |
| O  | -0.745378  | 1.190272  | -6.127776   |
| N  | -0.219736  | -1.001448 | -6.514708   |
| H  | 0.756115   | -0.727295 | -6.450249   |
| C  | -0.526989  | -2.322255 | -6.710949   |
| N  | -1.763199  | -2.770458 | -6.792815   |
| N  | 0.509374   | -3.185573 | -6.892897   |
| H  | 1.404507   | -2.896770 | -6.518067   |
| H  | 0.261570   | -4.141821 | -6.645966   |
| C  | -2.682274  | -1.787740 | -6.676197   |
| O  | -5.916926  | -6.053979 | -6.529804   |
| P  | -4.925063  | -6.634022 | -5.386926   |
| O  | -5.331028  | -6.195621 | -3.999290   |
| O  | -3.512819  | -5.899247 | -5.698498   |
| C  | -2.578836  | -6.434088 | -6.642729   |
| C  | -1.261604  | -6.715229 | -5.945804   |
| C  | -1.361429  | -7.610538 | -4.708770   |
| C  | -1.545498  | -6.607166 | -3.567689   |
| H  | -1.142664  | -6.968104 | -2.621000   |
| H  | -2.607357  | -6.397830 | -3.436972   |

|    |            |            |            |
|----|------------|------------|------------|
| C  | -0.784567  | -5.374116  | -4.060433  |
| N  | -1.419075  | -4.110525  | -3.722359  |
| C  | -2.764172  | -3.821466  | -3.614766  |
| N  | -3.005632  | -2.546622  | -3.449078  |
| C  | -1.756168  | -1.958110  | -3.456559  |
| C  | -1.383051  | -0.582459  | -3.349344  |
| O  | -2.107048  | 0.403792   | -3.218645  |
| N  | 0.009714   | -0.434763  | -3.433315  |
| H  | 0.341877   | 0.523979   | -3.425788  |
| C  | 0.911718   | -1.446305  | -3.641841  |
| N  | 0.572370   | -2.715401  | -3.729378  |
| N  | 2.206603   | -1.082508  | -3.827825  |
| H  | 2.518455   | -0.204235  | -3.436617  |
| H  | 2.871390   | -1.840327  | -3.752722  |
| H  | -3.514834  | -4.598169  | -3.656389  |
| C  | -0.763811  | -2.908275  | -3.636445  |
| H  | 0.225822   | -5.320329  | -3.649786  |
| H  | -2.198388  | -8.317713  | -4.780011  |
| O  | -0.133267  | -8.310305  | -4.608195  |
| C  | -0.160682  | -9.348163  | -3.644727  |
| H  | -0.307188  | -8.962093  | -2.629519  |
| H  | -0.960608  | -10.065417 | -3.867922  |
| H  | 0.803065   | -9.856165  | -3.693336  |
| O  | -0.679371  | -5.492277  | -5.475869  |
| H  | -0.573441  | -7.159078  | -6.671539  |
| H  | -2.963641  | -7.351899  | -7.094504  |
| H  | -2.421394  | -5.682650  | -7.422350  |
| O  | -4.832258  | -8.120829  | -5.618618  |
| Na | -5.450495  | -8.476489  | -3.329849  |
| H  | -7.492134  | -4.786612  | -6.192229  |
| O  | -5.560473  | -3.105010  | -8.082942  |
| H  | -5.933995  | -5.070687  | -8.621853  |
| H  | -8.331132  | -4.842226  | -8.757752  |
| H  | -7.531330  | -3.578782  | -9.728874  |
| O  | -10.568548 | -3.197132  | -9.338162  |
| O  | -6.564369  | 0.046650   | -11.297382 |
| H  | -8.531318  | -0.041363  | -11.906833 |
| H  | -7.584034  | 2.256041   | -12.192980 |

**Table 24S. M06-2X/6-31G(d,p) optimized reference geometry for trideoxycytidine diphosphate d(C)<sub>3</sub> in Model 4.**

|    |           |          |           |
|----|-----------|----------|-----------|
| O  | 4.190069  | 6.613881 | -2.773145 |
| C  | 5.055234  | 6.145123 | -1.758935 |
| H  | 4.497247  | 5.968382 | -0.828318 |
| H  | 5.839319  | 6.888348 | -1.553818 |
| C  | 5.703704  | 4.849582 | -2.203228 |
| H  | 6.479655  | 4.586061 | -1.477758 |
| O  | 4.732933  | 3.793911 | -2.238938 |
| C  | 4.579605  | 3.283855 | -3.559006 |
| H  | 5.072702  | 2.315026 | -3.658841 |
| N  | 3.160335  | 3.044207 | -3.796866 |
| C  | 2.297991  | 4.100423 | -3.736443 |
| H  | 2.742342  | 5.055956 | -3.471282 |
| C  | 0.976959  | 3.942825 | -3.973403 |
| H  | 0.287755  | 4.774468 | -3.928641 |
| C  | 0.537113  | 2.609257 | -4.267459 |
| N  | -0.749763 | 2.383561 | -4.563050 |
| H  | -1.433577 | 3.122929 | -4.528752 |
| H  | -1.060184 | 1.437763 | -4.727795 |
| N  | 1.361268  | 1.566630 | -4.265760 |
| C  | 2.686643  | 1.738221 | -4.024098 |
| O  | 3.477686  | 0.786466 | -4.006343 |
| C  | 5.204028  | 4.332163 | -4.477408 |
| H  | 4.486975  | 5.123496 | -4.704980 |
| H  | 5.573929  | 3.913515 | -5.410781 |
| C  | 6.309465  | 4.913406 | -3.608958 |
| O  | 7.485859  | 4.084947 | -3.583398 |
| P  | 8.314122  | 3.759204 | -4.942831 |
| O  | 9.771956  | 3.669776 | -4.566790 |
| Na | 10.270951 | 5.319702 | -6.209386 |
| O  | 7.745837  | 2.291742 | -5.360104 |

|    |           |           |            |
|----|-----------|-----------|------------|
| C  | 8.023137  | 1.212584  | -4.454110  |
| H  | 7.467061  | 1.368565  | -3.523476  |
| H  | 9.094236  | 1.182155  | -4.232667  |
| C  | 7.604969  | -0.096720 | -5.081816  |
| H  | 7.919598  | -0.903395 | -4.411357  |
| O  | 6.181402  | -0.130957 | -5.224357  |
| C  | 5.813252  | -0.384921 | -6.577066  |
| H  | 5.551482  | -1.435553 | -6.718286  |
| N  | 4.609486  | 0.381081  | -6.863482  |
| C  | 4.673348  | 1.740898  | -6.826017  |
| H  | 5.649716  | 2.159283  | -6.604226  |
| C  | 3.580642  | 2.508061  | -7.039903  |
| H  | 3.629811  | 3.588414  | -7.012555  |
| C  | 2.348775  | 1.808064  | -7.261533  |
| N  | 2.266761  | 0.482938  | -7.250625  |
| N  | 1.225012  | 2.500872  | -7.506701  |
| H  | 1.200734  | 3.499904  | -7.370315  |
| H  | 0.346207  | 2.003401  | -7.517885  |
| C  | 3.376371  | -0.274859 | -7.046817  |
| O  | 3.330496  | -1.510169 | -7.027634  |
| C  | 7.034926  | 0.001238  | -7.406036  |
| H  | 7.056871  | 1.075774  | -7.600647  |
| H  | 7.082150  | -0.520626 | -8.359272  |
| C  | 8.191837  | -0.345724 | -6.479532  |
| O  | 8.556470  | -1.736284 | -6.524958  |
| P  | 9.017081  | -2.450258 | -7.910312  |
| O  | 10.053317 | -3.487162 | -7.555747  |
| Na | 11.537620 | -2.502933 | -9.138500  |
| O  | 7.643411  | -3.169072 | -8.406965  |
| C  | 7.107112  | -4.188936 | -7.548897  |
| H  | 6.813922  | -3.738389 | -6.594260  |
| H  | 7.865508  | -4.956625 | -7.367969  |
| C  | 5.899948  | -4.813269 | -8.208825  |
| H  | 5.544970  | -5.624780 | -7.563069  |
| O  | 4.876720  | -3.822966 | -8.340399  |
| C  | 4.401924  | -3.783043 | -9.682081  |
| H  | 3.501857  | -4.388441 | -9.786927  |
| N  | 4.013507  | -2.411572 | -9.973485  |
| C  | 4.957094  | -1.434139 | -9.862779  |
| H  | 5.958585  | -1.778065 | -9.625660  |
| C  | 4.644521  | -0.129625 | -10.018809 |
| H  | 5.388211  | 0.650171  | -9.923663  |
| C  | 3.261450  | 0.166325  | -10.258385 |
| N  | 2.329180  | -0.776912 | -10.334613 |
| N  | 2.877741  | 1.441287  | -10.425814 |
| H  | 3.517856  | 2.196129  | -10.231257 |
| H  | 1.890448  | 1.651237  | -10.452475 |
| C  | 2.660366  | -2.086661 | -10.184889 |
| O  | 1.816968  | -2.987995 | -10.239205 |
| C  | 5.546663  | -4.322873 | -10.533788 |
| H  | 6.284998  | -3.542682 | -10.734955 |
| H  | 5.195046  | -4.728329 | -11.483317 |
| C  | 6.154401  | -5.381100 | -9.615998  |
| O  | 5.466468  | -6.618011 | -9.699879  |
| C  | 5.840111  | -7.379784 | -10.834053 |
| H  | 5.286240  | -8.317989 | -10.788310 |
| H  | 6.916606  | -7.591809 | -10.822072 |
| H  | 5.594675  | -6.866717 | -11.771116 |
| H  | 7.224645  | -5.536624 | -9.804637  |
| O  | 9.402246  | -1.442501 | -8.961479  |
| H  | 9.081261  | 0.258968  | -6.671427  |
| O  | 7.959627  | 4.711189  | -6.054838  |
| C  | 3.530580  | 7.810311  | -2.400879  |
| H  | 2.921943  | 7.659649  | -1.500693  |
| H  | 4.254233  | 8.611962  | -2.208124  |
| H  | 2.884579  | 8.097700  | -3.230971  |

**Table 25S. Base-pair step and helical parameters (for two steps RR/YY) for duplex structures obtained from M06-2X/6-31G(d,p) and 3DNA (ideal structure) and MD averaged parameters along with their standard deviations (within parenthesis).**

| Parameter                                 | Gas models |         |         |         | PCM models |        |        |        | Ideal structure |       | MD           |
|-------------------------------------------|------------|---------|---------|---------|------------|--------|--------|--------|-----------------|-------|--------------|
|                                           | Model 1    | Model 2 | Model 3 | Model 4 | A-DNA      | B-DNA  |        |        |                 |       |              |
| <b>Local base-pair step parameters</b>    |            |         |         |         |            |        |        |        |                 |       |              |
|                                           | 1GG/CC     | 2GG/CC  | 1GG/CC  | 2GG/CC  | 1GG/CC     | 2GG/CC | 1GG/CC | 2GG/CC | <b>Average</b>  |       |              |
| Shift (Å)                                 | -0.54      | -       | 0.02    | 0.05    | 0.7        | -0.93  | -0.29  | -0.85  | 0.0             | 0.0   | -0.05 (0.76) |
| Slide (Å)                                 | 0.56       | -       | 2.42    | 1.87    | 2.13       | 0.6    | 0.89   | 0.45   | -1.40           | 0.45  | -0.44 (0.68) |
| Rise (Å)                                  | 3.63       | -       | 3.44    | 4.01    | 3.15       | 3.38   | 3.2    | 3.05   | 3.3             | 3.36  | 3.32 (0.37)  |
| Tilt (deg.)                               | -7.17      | -       | 16.22   | -9.25   | 1.1        | -8.79  | -1.21  | -4.13  | -0.02           | 0.0   | -0.3 (4.6)   |
| Roll (deg.)                               | -2.67      | -       | -10.34  | -12.06  | -7.58      | 2.86   | -7.29  | 0.22   | 12.43           | 1.71  | 3.6 (7.2)    |
| Twist (deg.)                              | 44.58      | -       | 51.28   | 50.09   | 48.29      | 37.2   | 43.44  | 34.58  | 30.30           | 35.96 | 32.6 (7.3)   |
|                                           | 1AA/TT     | 2AA/TT  | 1AA/TT  | 2AA/TT  | 1AA/TT     | 2AA/TT | 1AA/TT | 2AA/TT | <b>Average</b>  |       |              |
| Shift (Å)                                 | 0.3        | 0.47    | 0.37    | 0.66    | -0.67      | 0.51   | 0.44   | -0.15  | 0.0             | 0.0   | -0.05 (0.76) |
| Slide (Å)                                 | 0.51       | -0.07   | 0.66    | 0.02    | 0.83       | -0.3   | -0.01  | 0.02   | -1.40           | 0.45  | -0.44 (0.68) |
| Rise (Å)                                  | 2.98       | 2.91    | 3.07    | 2.86    | 3.1        | 3.1    | 3.32   | 3.07   | 3.3             | 3.36  | 3.32 (0.37)  |
| Tilt (deg.)                               | -1.64      | -2.19   | 0.24    | -3.08   | -1.98      | -2.62  | 1.14   | -5.28  | -0.02           | 0.0   | -0.3 (4.6)   |
| Roll (deg.)                               | 0.2        | -0.54   | -2.22   | -6.5    | -2.83      | -2.8   | -2.19  | -6.49  | 12.43           | 1.71  | 3.6 (7.2)    |
| Twist (deg.)                              | 35.12      | 38.44   | 39.07   | 39.66   | 40.69      | 43.94  | 44.08  | 44.02  | 30.30           | 35.96 | 32.6 (7.3)   |
| <b>Local base-pair helical parameters</b> |            |         |         |         |            |        |        |        |                 |       |              |
|                                           | 1GG/CC     | 2GG/CC  | 1GG/CC  | 2GG/CC  | 1GG/CC     | 2GG/CC | 1GG/CC | 2GG/CC | <b>Average</b>  |       |              |
| X-disp. (Å)                               | 0.99       | -       | 3.26    | -0.77   | 3.1        | 0.53   | 1.84   | 0.72   | -4.48           | 0.49  | -1.44 (0.89) |
| Y-disp. (Å)                               | -0.01      | -       | 0.96    | 3.45    | -0.01      | 0.23   | 0.27   | 0.83   | 0.0             | 0.01  | 0.02 (0.55)  |
| Incl. (deg.)                              | -3.49      | -       | -11.49  | 10.64   | -9.19      | 4.4    | -9.77  | 0.37   | 22.63           | 2.76  | 6.8 (5.4)    |
| Tip (deg.)                                | 9.37       | -       | -18.03  | 52.2    | -1.33      | 13.52  | 1.61   | 6.92   | 0.03            | 0.0   | 0.3 (5)      |
|                                           | 1AA/TT     | 2AA/TT  | 1AA/TT  | 2AA/TT  | 1AA/TT     | 2AA/TT | 1AA/TT | 2AA/TT | <b>Average</b>  |       |              |
| X-disp. (Å)                               | 0.81       | -0.05   | 1.23    | 0.66    | 1.49       | -0.15  | 0.19   | 0.58   | -4.48           | 0.49  | -1.44 (0.89) |
| Y-disp. (Å)                               | -0.71      | -0.95   | -0.53   | -1.27   | 0.75       | -0.91  | -0.48  | -0.25  | 0.0             | 0.01  | 0.02 (0.55)  |
| Incl. (deg.)                              | 0.33       | -0.82   | -3.32   | -9.49   | -4.05      | -3.74  | -2.92  | -8.56  | 22.63           | 2.76  | 6.8 (5.4)    |
| Tip (deg.)                                | 2.72       | 3.33    | -0.37   | 4.49    | 2.84       | 3.49   | -1.52  | 6.97   | 0.03            | 0.0   | 0.3 (5)      |

**Table 26S. d(ApApA) duplex's backbone torsions in both strands (R/Y), and mean values for the torsion angles taken from MD sequence-averaged and experimental studies along with their standard deviations (within parenthesis).**

| Angle       | Gas models        |                   | PCM models        |                   | Ideal structure <sup>a</sup> |        | Molecular Dynamics <sup>b</sup> | Experiment <sup>c</sup> |           |
|-------------|-------------------|-------------------|-------------------|-------------------|------------------------------|--------|---------------------------------|-------------------------|-----------|
|             | Model 1           | Model 2           | Model 3           | Model 4           | A-DNA                        | B-DNA  |                                 | BI                      | BII       |
| $\alpha$    | 15.8/<br>-61.4    | 11.8/<br>19.7     | -56.3/<br>-64.5   | -65.5/<br>-61.5   | -51.7                        | -29.9  | -72.6 (15.7)                    | -62 (15)                | -         |
| $\beta$     | 92.1/<br>-176.9   | 92.3/<br>96.9     | 136.7/<br>-166.7  | -166.8/<br>-179.0 | 174.8                        | 136.3  | 169.6 (16.2)                    | 176 (9)                 | 146 (8)   |
| $\gamma$    | 43.8/<br>57.8     | 46.6/<br>42.4     | 55.4/<br>52.5     | 55.2/<br>58.5     | 41.7                         | 31.2   | 54.8 (14.1)                     | 48 (11)                 | -         |
| $\delta$    | 136.9/<br>146.7   | 136.4/<br>132     | 145.7/<br>139.7   | 147.6/<br>139.8   | 79.1                         | 143.3  | 125.4 (19.1)                    | 128 (13)                | 144 (7)   |
| $\epsilon$  | -167.7/<br>-173.1 | -168.3/<br>-166.3 | 172.9/<br>177.6   | 162.1/<br>171.3   | -147.8                       | -140.8 | -162.6 (33.3)                   | -176 (11)               | -114 (15) |
| $\zeta$     | 167.8/<br>178.6   | 170.2/<br>170.9   | -102.3/<br>-98.7  | -96.6/<br>-100.9  | -75.1                        | -160.5 | -102.8 (47.6)                   | -95 (10)                | 174 (14)  |
| $\chi$      | -102.5/<br>-109.3 | -104.2/<br>-112.4 | -109.3/<br>-108.8 | -105.6/<br>-107.0 | -157.2                       | -98.0  | -116 (19.5)                     | -102 (14) /<br>-119 (8) | -89 (8)   |
| Phase angle | 144.1/<br>159.8   | 140.0/<br>135.0   | 166.4/<br>159.0   | 177.2/<br>159.9   | 8.0                          | 153.9  | 136.7 (33.6)                    | 144 (30)                | -         |

<sup>a</sup> Obtained using comprehensive software package 3DNA.

<sup>b</sup> The conformational parameters averaged over the 39 oligomers and corresponds to a total of 19.5 million data points for each parameter. Simulations were run with 150 mM KCl using the AMBER suite of programs with the parmbsc0 modifications to the parm99 force field.

<sup>c</sup> The sample of 34 B-DNAs with reported resolutions between 0.7 and 3.3 Å taken from the Nucleic Acid Database was interrogated using the NDBQuery interface program. The mean values for the torsion angles were calculated in ranges determined from the scattergrams.

**Table 27S. d(GpGpG) duplex's backbone torsions in both strands (R/Y), and mean values for the torsion angles taken from MD sequence-averaged and experimental studies along with their standard deviations (within parenthesis).**

| Angle       | Gas models        |                   | PCM models       |                   | Ideal structure <sup>a</sup> |        | Molecular Dynamics <sup>b</sup> | Experiment <sup>c</sup> |           |
|-------------|-------------------|-------------------|------------------|-------------------|------------------------------|--------|---------------------------------|-------------------------|-----------|
|             | Model 1           | Model 2           | Model 3          | Model 4           | A-DNA                        | B-DNA  |                                 | BI                      | BII       |
| $\alpha$    | -58.5/<br>-63.3   | 22.3/<br>6.5      | -66.4/<br>-74.9  | -72.5/<br>-60.8   | -51.7                        | -29.9  | -72.6 (15.7)                    | -62 (15)                | -         |
| $\beta$     | -176.6/<br>127.1  | 93.3/<br>90.1     | 172.0/<br>134.0  | 169.0/<br>-174.2  | 174.8                        | 136.3  | 169.6 (16.2)                    | 176 (9)                 | 146 (8)   |
| $\gamma$    | 61.4/<br>59.6     | 46.2/<br>47.3     | 43.7/<br>52.0    | 43.0/<br>54.4     | 41.7                         | 31.2   | 54.8 (14.1)                     | 48 (11)                 | -         |
| $\delta$    | 159.3/<br>142.1   | 138.9/<br>137.4   | 140.5/<br>142.0  | 140.7/<br>138.8   | 79.1                         | 143.3  | 125.4 (19.1)                    | 128 (13)                | 144 (7)   |
| $\epsilon$  | -69.1/<br>166.3   | -137.6/<br>-167.8 | -93.1/<br>-168.2 | -146.7/<br>172.7  | -147.8                       | -140.8 | -162.6 (33.3)                   | -176 (11)               | -114 (15) |
| $\zeta$     | 132.1/<br>-96.8   | 174.8/<br>-164.3  | 158.8/<br>-130.5 | -177.9/<br>-103.3 | -75.1                        | -160.5 | -102.8 (47.6)                   | -95 (10)                | 174 (14)  |
| $\chi$      | -100.5/<br>-104.7 | -85.2/<br>-76.8   | -86.8/<br>-95.3  | -84.6/<br>-105.8  | -157.2                       | -98.0  | -116 (19.5)                     | -102 (14) /<br>-119 (8) | -89 (8)   |
| Phase angle | 182.9/<br>172.2   | 141.8/<br>139.4   | 145.3/<br>154.3  | 145.2/<br>164.9   | 8.0                          | 153.9  | 136.7 (33.6)                    | 144 (30)                | -         |

<sup>a</sup> Obtained using comprehensive software package 3DNA.

<sup>b</sup> The conformational parameters averaged over the 39 oligomers and corresponds to a total of 19.5 million data points for each parameter. Simulations were run with 150 mM KCl using the AMBER suite of programs with the parmbsc0 modifications to the parm99 force field.

<sup>c</sup> The sample of 34 B-DNAs with reported resolutions between 0.7 and 3.3 Å taken from the Nucleic Acid Database was interrogated using the NDBQuery interface program. The mean values for the torsion angles were calculated in ranges determined from the scattergrams.



**Table 28S. The angle of pseudorotation of sugar ring (P) and the main chain torsion angles (in the 5'→3' direction) obtained in different models for optimized reference structures of trioxynucleotide diphosphates <sup>a</sup>.**

| Angles | d(A) <sub>3</sub> |          |            |          | d(T) <sub>3</sub> |          |            |          |
|--------|-------------------|----------|------------|----------|-------------------|----------|------------|----------|
|        | Gas models        |          | PCM models |          | Gas models        |          | PCM models |          |
|        | Model 1           | Model 2  | Model 3    | Model 4  | Model 1           | Model 2  | Model 3    | Model 4  |
| α      | +sp               | +sp      | -sc        | -sc      | -sc               | +sp      | +sp        | +sc      |
| β      | +ac               | +ac      | +ac        | +ac      | +ap               | +ac      | +ac        | +sc      |
| γ      | +sc               | +sc      | +sc        | +sc      | +sc               | +sc      | +sc        | +sc      |
| δ      | +ac               | +ac      | +ac        | +ac      | +ac               | +ac      | +ac        | +ac      |
| ε      | -ap               | -ap      | +ap        | +ap      | -ap               | -ap      | -ap        | +ap      |
| ζ      | -sc               | +ap      | -sc        | -ac      | +ap               | +ap      | +ap        | -sc      |
| χ      | -ac               | -ac      | -ac        | -ac      | -ac               | -ac      | -ac        | -ac      |
| P      | C2'-endo          | C2'-endo | C2'-endo   | C2'-endo | C2'-endo          | C2'-endo | C2'-endo   | C2'-endo |
| form   | B-DNA             | B-DNA    | B-DNA      | B-DNA    | B-DNA             | B-DNA    | B-DNA      | B-DNA    |
|        | d(G) <sub>3</sub> |          |            |          | d(C) <sub>3</sub> |          |            |          |
| α      | -sc               | +sp      | -sc        | -sc      | -sc               | +sp      | -sc        | -sc      |
| β      | -ap               | +ac      | +ap        | -ap      | +ac               | +ac      | -ap        | +ac      |
| γ      | +sc               | +sc      | +sc        | -ap      | +sc               | +sc      | +sc        | +sc      |
| δ      | +ap               | +ac      | +ac        | +ap      | +ap               | +ac      | +ac        | +ac      |
| ε      | -sc               | -ap      | +ac        | -ap      | +ap               | +ap      | +ap        | +ap      |
| ζ      | +ac               | -ap      | -sc        | -sc      | -sc               | -ac      | -ac        | -ac      |
| χ      | -ac               | -ac      | -ac        | -ac      | -ac               | -sc      | -ac        | -ac      |
| P      | C2'-endo          | C2'-endo | C2'-endo   | C2'-endo | C2'-endo          | C2'-endo | C2'-endo   | C2'-endo |
| form   | B-DNA             | B-DNA    | B-DNA      | B-DNA    | B-DNA             | B-DNA    | B-DNA      | B-DNA    |

<sup>a</sup> For reference, in practice, torsion angles are often not known exactly, but can be assigned to particular conformational regions. The Klyne-Prelog notation of torsion angle ranges characterize the B-DNA conformational forms of polynucleotides obtained from fiber diffraction measurements are the followings: α (-sc), β (+ac to -ap), γ (+sc), δ (+sc to +ap), ε (+ap to -ac), ζ (-ac to -sc and +ap to -ap), χ (-ac to -sc). For the majority of angles, we can assume that the conformational ranges obtained for trioxynucleotide diphosphates fit B-DNA conformational form of polynucleotide.
